# Supplementary material for: Unusual Tetrahydropyridoindole-Containing Tetrapeptides with Human Nicotinic Acetylcholine Receptors Targeting Activity Discovered from Antarctica-Derived Psychrophilic Pseudogymnoascus sp. HDN17-933
Source: MDPI journal article supplement (doi:10.3390/md20100593), 2022-09-22
Supplement: s1 [file s1]

## SUPPLEMENTARY MATERIAL

### Unusual Tetrahydropyridoindole-Containing Tetrapeptides with Human Nicotinic Acetylcholine Receptors targeting Activity Discovered from Antarctica-Derived Psychrophilic *Pseudogymnoascus* sp. HDN17-933

Xuewen Hou <sup>1</sup>, Changlong Li <sup>1</sup>, Runfang Zhang <sup>1</sup>, Yinping Li <sup>1</sup>, Huadong Li <sup>1</sup>,  
Yundong Zhang <sup>1</sup>, HanShen Tae <sup>2</sup>, Rilei Yu <sup>1</sup>, Qian Che <sup>1</sup>, Tianjiao Zhu <sup>1</sup>, Dehai Li  
<sup>1,3,4,\*</sup>, and Guojian Zhang <sup>1,3,5,\*</sup>

<sup>1</sup> Key Laboratory of Marine Drugs, Chinese Ministry of Education, School of Medicine and  
Pharmacy, Ocean University of China, Qingdao 266003, China

<sup>2</sup> Illawarra Health and Medical Research Institute (IHMRI), University of Wollongong,  
Wollongong, New South Wales 2522, Australia

<sup>3</sup> Laboratory for Marine Drugs and Bioproducts, Pilot National Laboratory for Marine Science  
and Technology, Qingdao 266237, China

<sup>4</sup> Open Studio for Druggability Research of Marine Natural Products, Pilot National Laboratory  
for Marine Science and Technology, Qingdao 266237, China

<sup>5</sup> Marine Biomedical Research Institute of Qingdao, Qingdao 266101, China

\* Correspondence: zhangguojian@ouc.edu.cn (G.Z.); Tel: +86-532-82032971  
dehaili@ouc.edu.cn (D.L.); Tel.: +86-532-8203-1619

## ABSTRACT

Chemical investigation of the psychrophilic fungus *Pseudogymnoascus* sp. HDN17-933 derived from Antarctica led to the discovery of six new tetrapeptides psegynamides A-F (**1-6**), whose planar structures were elucidated by extensive NMR and MS spectrometric analyses. Structurally, psegynamides D-F (**4-6**) possess unique backbones bearing a tetrahydropyridoindoles unit, which make them the first examples discovered in naturally occurring peptides. The absolute configurations of structures were unambiguously determined using solid-phase total synthesis assisted by Marfey's method, and all compounds were evaluated for their inhibition of human (h) nicotinic acetylcholine receptor subtypes. Compound **2** showed significant inhibitory activity. Preliminary structure-activity relationship investigation revealed that the tryptophan residue and the C-terminal with methoxy group were important to the inhibitory activity. Further, the high binding affinity of compound **2** to  $\alpha 4\beta 2$  was explained by molecular docking studies.

## Table of Contents

- Figure S1.** 18S rRNA sequences data of *Pseudogymnoascus* sp. HDN17-933
- Figure S2.** HPLC analysis of the crude extract of HDN17-933.
- Figure S3.**  $^1\text{H}$ -NMR spectrum (600 MHz,  $\text{DMSO-}d_6$ ) of compound **1**
- Figure S4.**  $^{13}\text{C}$ -NMR spectrum (150 MHz,  $\text{DMSO-}d_6$ ) of compound **1**
- Figure S5.** DEPT (150 MHz,  $\text{DMSO-}d_6$ ) spectrum of compound **1**.
- Figure S6.** HSQC spectrum (600 MHz,  $\text{DMSO-}d_6$ ) of compound **1**
- Figure S7.**  $^1\text{H}$ - $^1\text{H}$  COSY spectrum (600 MHz,  $\text{DMSO-}d_6$ ) of compound **1**
- Figure S8.** HMBC spectrum (600 MHz,  $\text{DMSO-}d_6$ ) of compound **1**
- Figure S9.** NOESY spectrum (600 MHz,  $\text{DMSO-}d_6$ ) of compound **1**
- Figure S10.** TOCSY spectrum (600 MHz,  $\text{DMSO-}d_6$ ) of compound **1**
- Figure S11.** HRESIMS spectrum of compound **1**.
- Figure S12.** IR spectrum of compound **1**.
- Figure S13.**  $^1\text{H}$ -NMR spectrum (600 MHz,  $\text{DMSO-}d_6$ ) of compound **2**
- Figure S14.**  $^{13}\text{C}$ -NMR spectrum (150 MHz,  $\text{DMSO-}d_6$ ) of compound **2**
- Figure S15.** DEPT (150 MHz,  $\text{DMSO-}d_6$ ) spectrum of compound **2**
- Figure S16.** HSQC spectrum (600 MHz,  $\text{DMSO-}d_6$ ) of compound **2**
- Figure S17.**  $^1\text{H}$ - $^1\text{H}$  COSY spectrum (600 MHz,  $\text{DMSO-}d_6$ ) of compound **2**
- Figure S18.** HMBC spectrum (600 MHz,  $\text{DMSO-}d_6$ ) of compound **2**
- Figure S19.** TOCSY spectrum (600 MHz,  $\text{DMSO-}d_6$ ) of compound **2**
- Figure S20.** HRESIMS spectrum of compound **2**
- Figure S21.** IR spectrum of compound **2**

- Figure S22.**  $^1\text{H}$ -NMR spectrum (600 MHz,  $\text{DMSO-}d_6$ ) of compound **3**
- Figure S23.**  $^{13}\text{C}$ -NMR spectrum (150 MHz,  $\text{DMSO-}d_6$ ) of compound **3**
- Figure S24.** DEPT (150 MHz,  $\text{DMSO-}d_6$ ) spectrum of compound **3**
- Figure S25.** HSQC spectrum (600 MHz,  $\text{DMSO-}d_6$ ) of compound **3**
- Figure S26.**  $^1\text{H}$ - $^1\text{H}$  COSY spectrum (600 MHz,  $\text{DMSO-}d_6$ ) of compound **3**
- Figure S27.** HMBC spectrum (600 MHz,  $\text{DMSO-}d_6$ ) of compound **3**
- Figure S28.** TOCSY spectrum (600 MHz,  $\text{DMSO-}d_6$ ) of compound **3**
- Figure S29.** HRESIMS spectrum of compound **3**
- Figure S30.** IR spectrum of compound **3**
- Figure S31.**  $^1\text{H}$ -NMR spectrum (600 MHz,  $\text{DMSO-}d_6$ ) of compound **4**
- Figure S32.**  $^{13}\text{C}$ -NMR spectrum (150 MHz,  $\text{DMSO-}d_6$ ) of compound **4**
- Figure S33.** DEPT (150 MHz,  $\text{DMSO-}d_6$ ) spectrum of compound **4**
- Figure S34.** HSQC spectrum (600 MHz,  $\text{DMSO-}d_6$ ) of compound **4**
- Figure S35.** HMBC spectrum (600 MHz,  $\text{DMSO-}d_6$ ) of compound **4**
- Figure S36.** NOESY spectrum (600 MHz,  $\text{DMSO-}d_6$ ) of compound **4**
- Figure S37.** TOCSY spectrum (600 MHz,  $\text{DMSO-}d_6$ ) of compound **4**
- Figure S38.** HRESIMS spectrum of compound **4**
- Figure S39.** IR spectrum of compound **4**
- Figure S40.**  $^1\text{H}$ -NMR spectrum (600 MHz,  $\text{DMSO-}d_6$ ) of compound **5**
- Figure S41.**  $^{13}\text{C}$ -NMR spectrum (150 MHz,  $\text{DMSO-}d_6$ ) of compound **5**
- Figure S42.** DEPT (150 MHz,  $\text{DMSO-}d_6$ ) spectrum of compound **5**
- Figure S43.** HSQC spectrum (600 MHz,  $\text{DMSO-}d_6$ ) of compound **5**



- Figure S44.**  $^1\text{H}$ - $^1\text{H}$  COSY spectrum (600 MHz, DMSO- $d_6$ ) of compound **5**
- Figure S45.** HMBC spectrum (600 MHz, DMSO- $d_6$ ) of compound **5**
- Figure S46.** TOCSY spectrum (600 MHz, DMSO- $d_6$ ) of compound **5**
- Figure S47.** HRESIMS spectrum of compound **5**
- Figure S48.** IR spectrum of compound **5**
- Figure S49.**  $^1\text{H}$ -NMR spectrum (600 MHz, DMSO- $d_6$ ) of compound **6**
- Figure S50.**  $^{13}\text{C}$ -NMR spectrum (150 MHz, DMSO- $d_6$ ) of compound **6**
- Figure S51.** DEPT (150 MHz, DMSO- $d_6$ ) spectrum of compound **6**
- Figure S52.** HSQC spectrum (600 MHz, DMSO- $d_6$ ) of compound **6**
- Figure S53.**  $^1\text{H}$ - $^1\text{H}$  COSY spectrum (600 MHz, DMSO- $d_6$ ) of compound **6**
- Figure S54.** HMBC spectrum (600 MHz, DMSO- $d_6$ ) of compound **6**
- Figure S55.** TOCSY spectrum (600 MHz, DMSO- $d_6$ ) of compound **6**
- Figure S56.** HRESIMS spectrum of compound **6**
- Figure S57.** IR spectrum of compound **6**
- Figure S58.** Advanced Marfey's acid hydrolytic analysis of compound **1**
- Figure S59.** Advanced Marfey's alkaline hydrolytic analysis of compound **1**
- Figure S60.**  $^1\text{H}$ -NMR spectrum of **1a** (400 MHz, DMSO- $d_6$ )
- Figure S61.**  $^{13}\text{C}$ -NMR spectrum of **1a** (100 MHz, DMSO- $d_6$ )
- Figure S62.**  $^1\text{H}$ -NMR spectrum of **1b** (400 MHz, DMSO- $d_6$ )
- Figure S63.**  $^{13}\text{C}$ -NMR spectrum of **1b** (100 MHz, DMSO- $d_6$ )
- Figure S64.** Comparison of  $^1\text{H}$ -NMR spectra of authentic **1**, **1a**, and **1b**
- Figure S65.** Advanced Marfey's acid hydrolytic analysis of compound **2**

**Figure S66.** Advanced Marfey's alkaline hydrolytic analysis of compound **2**

**Figure S67.**  $^1\text{H}$ -NMR spectrum of **2a** (400 MHz,  $\text{DMSO-}d_6$ )

**Figure S68.**  $^{13}\text{C}$ -NMR spectrum of **2a** (100 MHz,  $\text{DMSO-}d_6$ )

**Figure S69.**  $^1\text{H}$ -NMR spectrum of **2b** (400 MHz,  $\text{DMSO-}d_6$ )

**Figure S70.**  $^{13}\text{C}$ -NMR spectrum of **2b** (100 MHz,  $\text{DMSO-}d_6$ )

**Figure S71.** Comparison of  $^1\text{H}$ -NMR spectra of authentic **2**, **2a**, and **2b**

**Figure S72.** Advanced Marfey's acid hydrolytic analysis of compound **3**

**Figure S73.** Advanced Marfey's alkaline hydrolytic analysis of compound **3**

**Figure S74.**  $^1\text{H}$ -NMR spectrum of synthetic **3** (400 MHz,  $\text{DMSO-}d_6$ )

**Figure S75.**  $^{13}\text{C}$ -NMR spectrum of synthetic **3** (100 MHz,  $\text{DMSO-}d_6$ )

**Figure S76.** Comparison of  $^1\text{H}$ -NMR spectra of **3** with synthetic **3**

**Figure S77.** Advanced Marfey's acid hydrolytic analysis of compound **4**

**Figure S78.**  $^1\text{H}$ -NMR spectrum of synthetic **4** (400 MHz,  $\text{DMSO-}d_6$ )

**Figure S79.**  $^{13}\text{C}$ -NMR spectrum of synthetic **4** (100 MHz,  $\text{DMSO-}d_6$ )

**Figure S80.** Comparison of  $^1\text{H}$ -NMR spectra of **4**, with synthetic **4**

**Figure S81.** Advanced Marfey's acid hydrolytic analysis of compound **5**

**Figure S82.**  $^1\text{H}$ -NMR spectrum of synthetic **5** (400 MHz,  $\text{DMSO-}d_6$ )

**Figure S83.**  $^{13}\text{C}$ -NMR spectrum of synthetic **5** (100 MHz,  $\text{DMSO-}d_6$ )

**Figure S84.** Comparison of  $^1\text{H}$ -NMR spectra of **5** with synthetic **5**

**Figure S85.** Advanced Marfey's acid hydrolytic analysis of compound **6**

**Figure S86.**  $^1\text{H}$ -NMR spectrum of synthetic **6** (400 MHz,  $\text{DMSO-}d_6$ )

**Figure S87.**  $^{13}\text{C}$ -NMR spectrum of synthetic **6** (100 MHz,  $\text{DMSO-}d_6$ )

**Figure S88.** Comparison of <sup>1</sup>H-NMR spectra of **6** with synthetic **6**

**Table S1.** Table of compounds (**1-6**) (100  $\mu$ M) inhibition of ACh-evoked peak current amplitude mediated by human (h)  $\alpha 1\beta 1\epsilon\delta$ ,  $\alpha 1\beta 1\gamma\delta$ ,  $\alpha 3\beta 2$ ,  $\alpha 3\beta 4$ ,  $\alpha 4\beta 2$ ,  $\alpha 7$  and  $\alpha 9\alpha 10$  nAChRs.

**Table S2.** Free binding energy estimation and molecular interactions of compounds **1-6**

GGGCAACGTGTCGACGGGTTGCCGCAGGCCTCCCGGGTAACCT  
ACCACCCTTTGTTTATTATACTTTGTTGCTTTGGCAGGCCTGCCC  
TCGGGCTGCTGGCTCCGGCCGGCGAGCGCTTGCCAGAGGACCT  
AAACTCTGTTTGTCTATACTGTCTGAGTACTATATAATAGTTAAA  
ACTTTCAACAACGGATCTCTTGGTTCTGGCATCGATGAAGAACG  
CAGCGAAATGCGATAAGTAATGTGAATTGCAGAATTCAGTGAAT  
CATCGAATCTTTGAACGCACATTGCGCCCCCTGGTATTCCGGGG  
GGCATGCCTGTCCGAGCGTCATTACAACCCTCAAGCTCAGCTTG  
GTATTGGGCCCCGCCGACCCGGCGGGGCCCTAAAGTCAGTGGCG  
GTGCCGTCCGGCTCCGAGCGTAGTAATTCTTCTCGCTCTGGAGG  
CCCGGTCGTGTGCTCGCCAGCAACCCCCAATTTTTTTCAGGTTG  
ACCTCGGATCAGGTAGGGATACCCGCTGAACTTAAGCATATCAA  
TAAGCGGAGGAAATTACAG

**Figure S1.** 18S rRNA sequences data of *Pseudogymnoascus* sp. HDN17-933

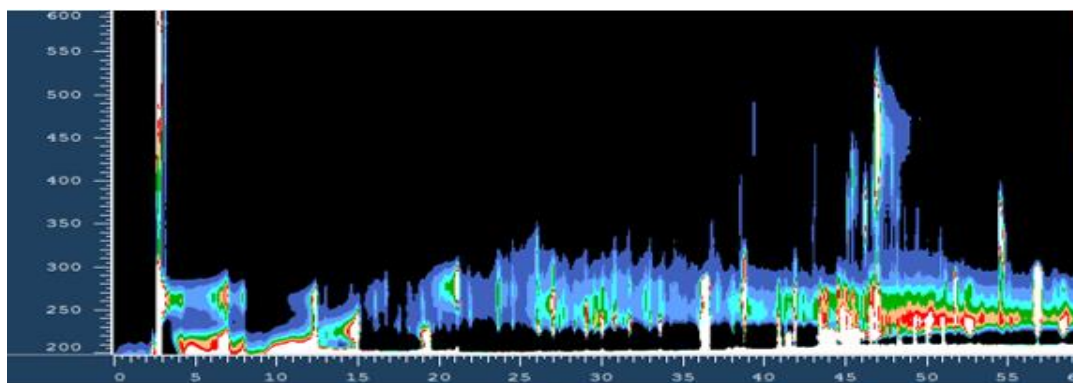

**Figure S2.** HPLC analysis of the crude extract of HDN17-933.

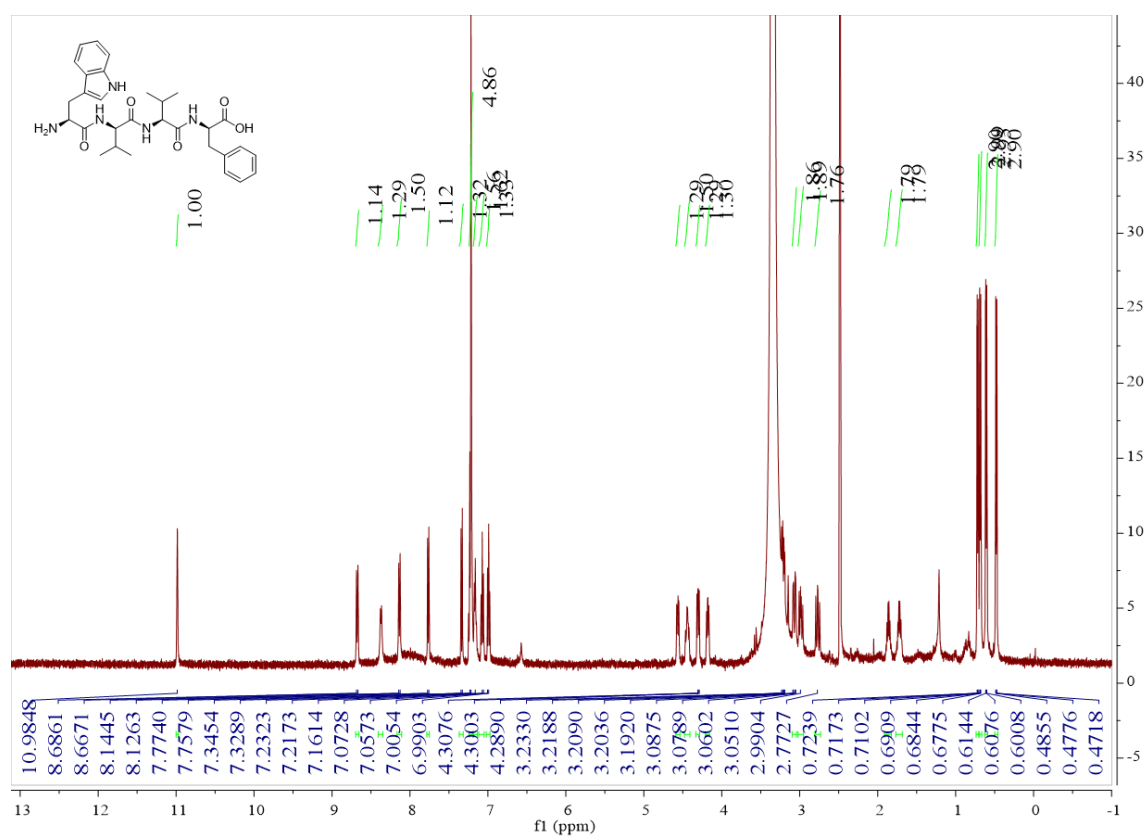

**Figure S3.** <sup>1</sup>H-NMR spectrum (600 MHz, DMSO-*d*<sub>6</sub>) of compound 1

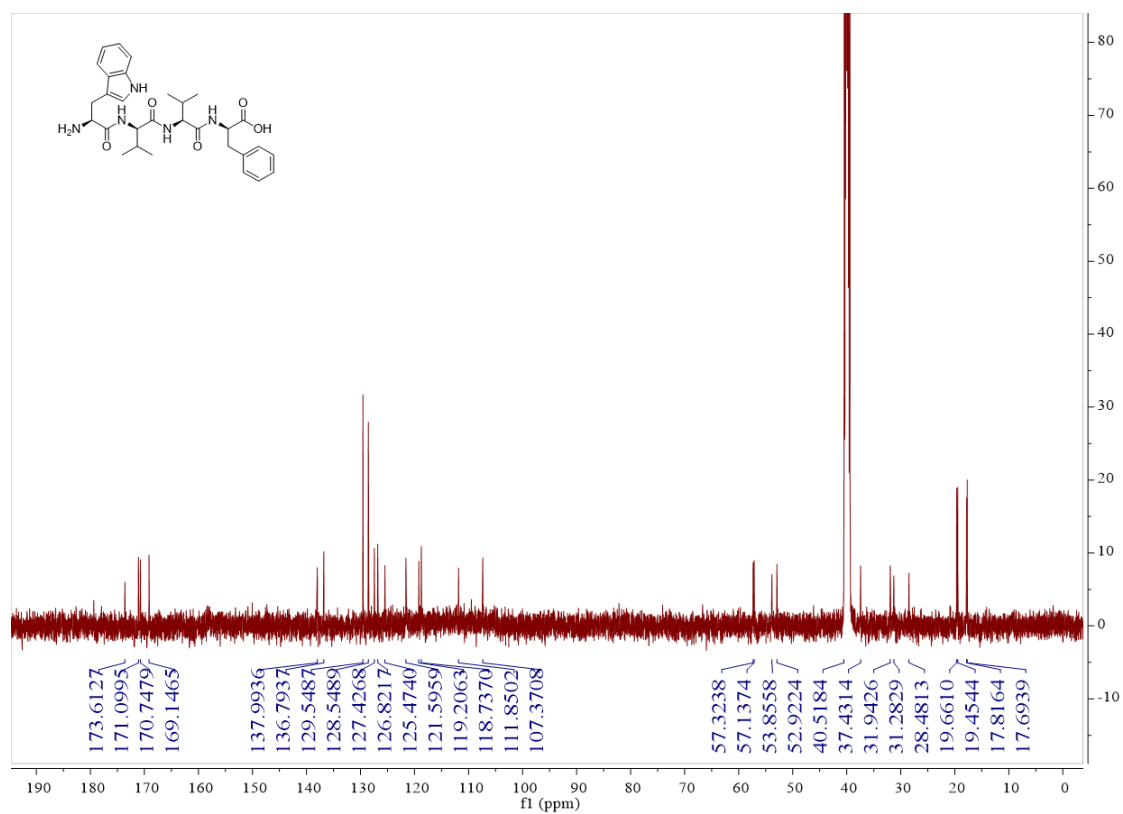

**Figure S4.** <sup>13</sup>C-NMR spectrum (150 MHz, DMSO-*d*<sub>6</sub>) of compound **1**

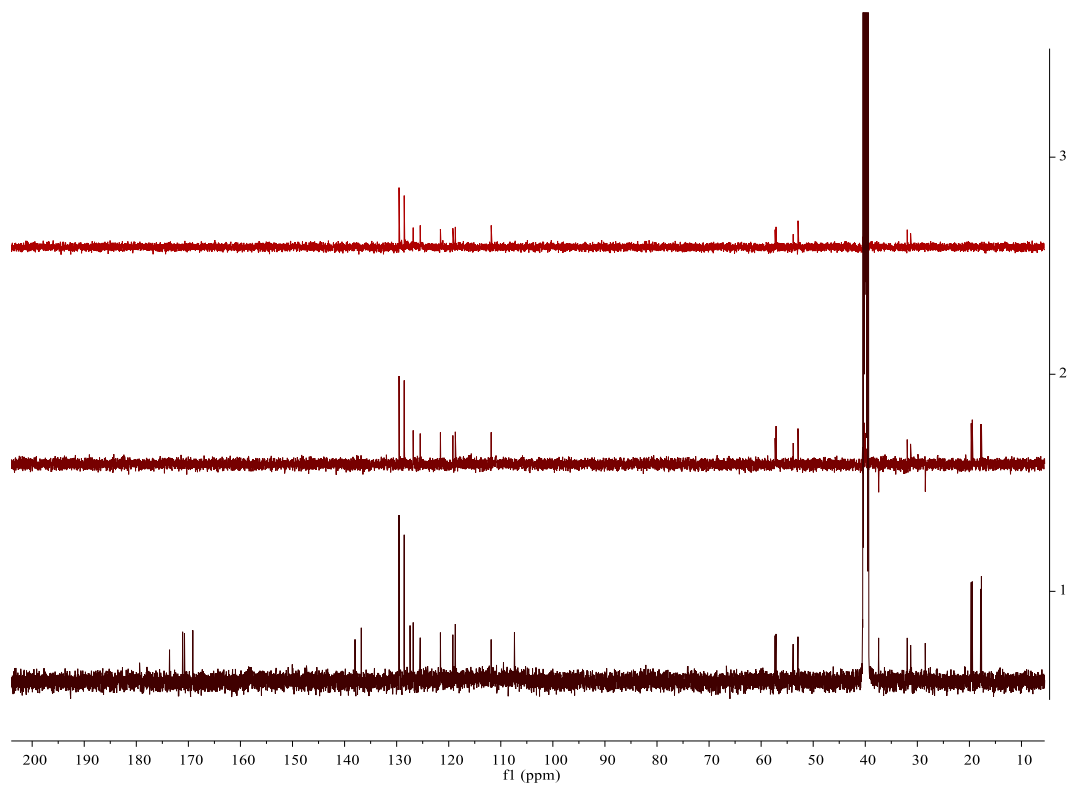

**Figure S5.** DEPT (150 MHz, DMSO-*d*<sub>6</sub>) spectrum of compound **1**.

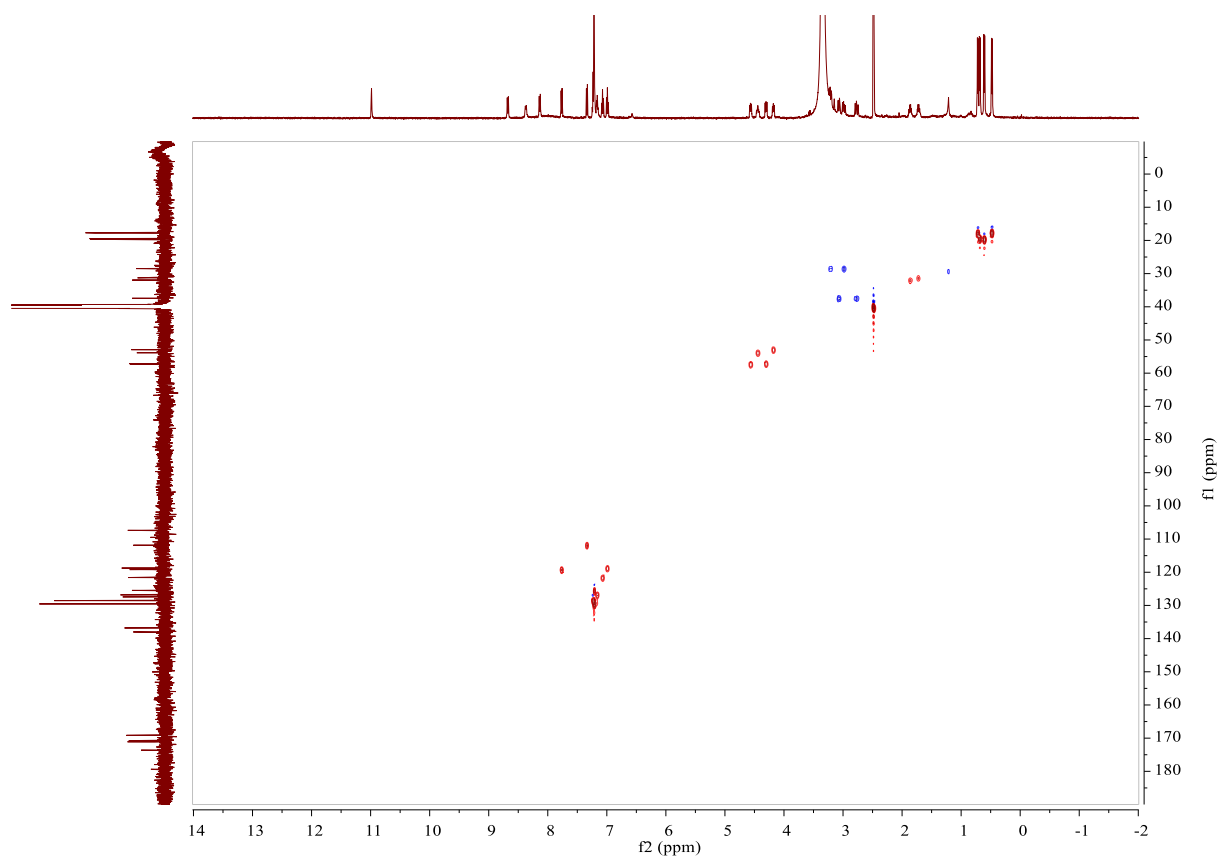

**Figure S6.** HSQC spectrum (600 MHz,  $\text{DMSO}-d_6$ ) of compound **1**.

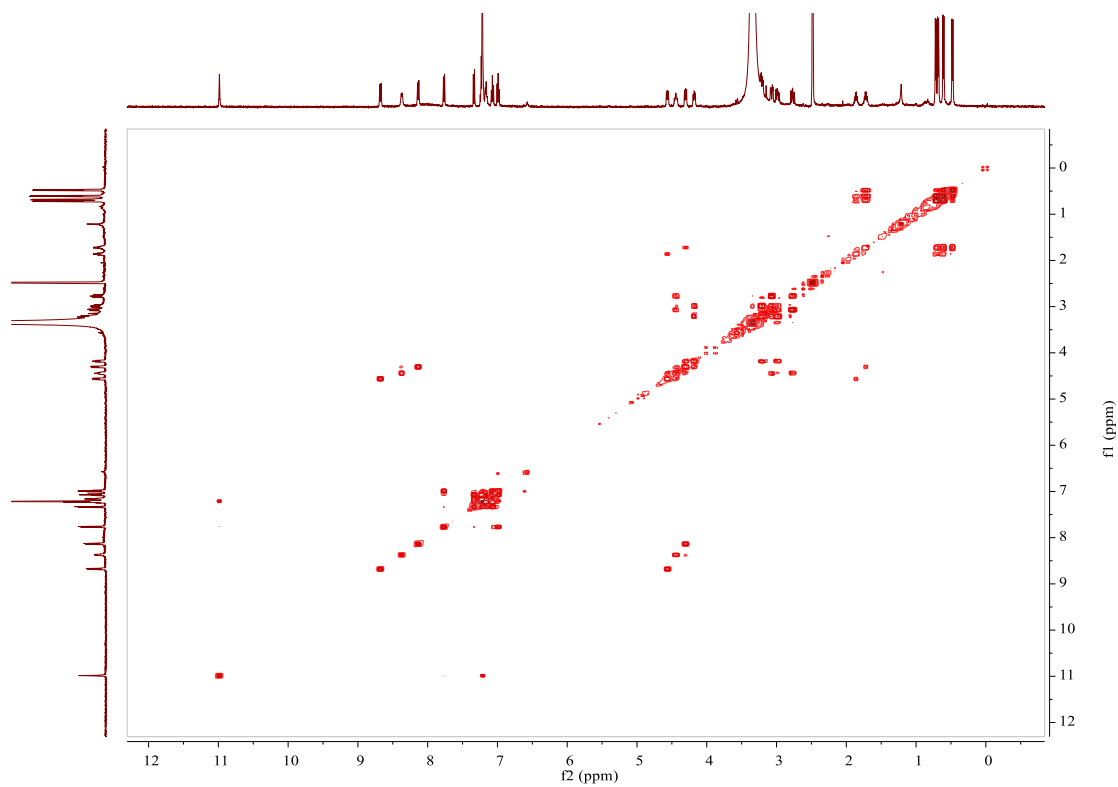

**Figure S7.**  $^1\text{H}$ - $^1\text{H}$  COSY spectrum (600 MHz,  $\text{DMSO}-d_6$ ) of compound **1**

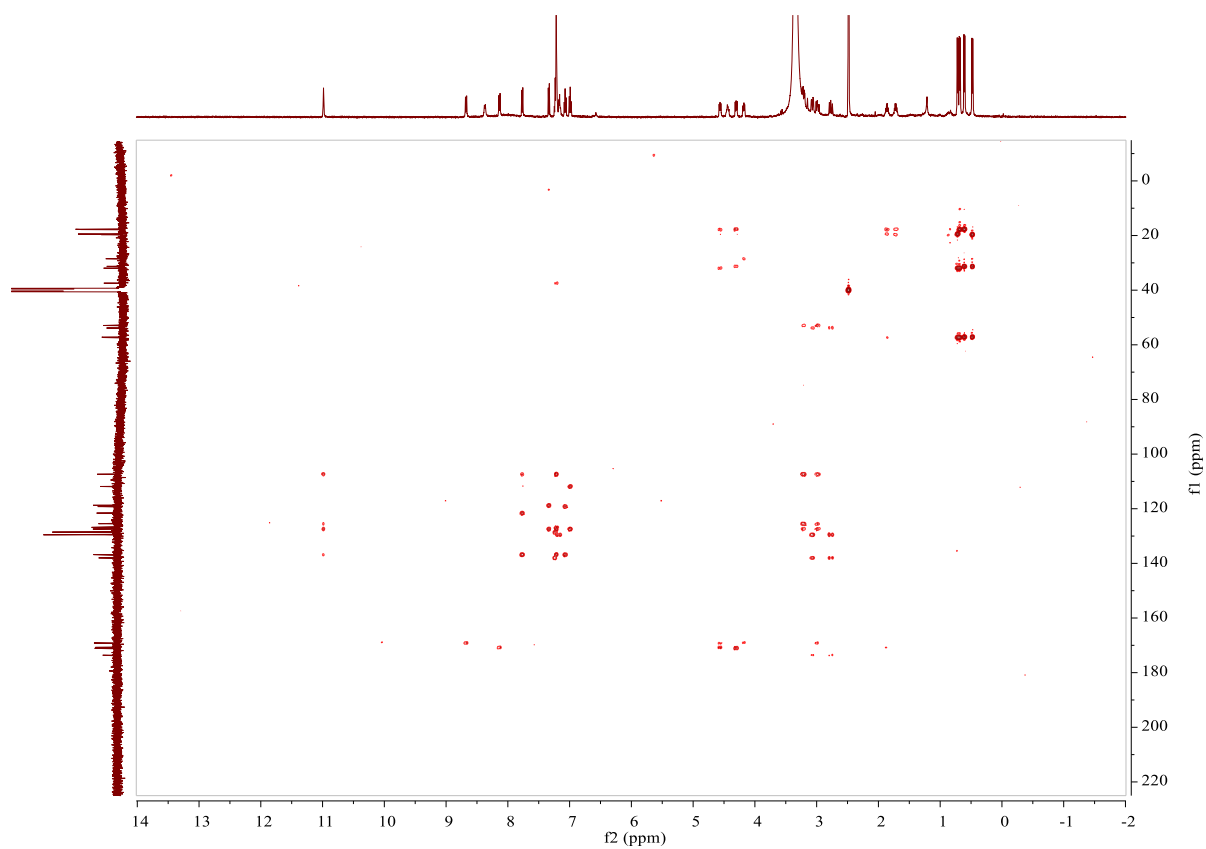

**Figure S8.** HMBC spectrum (600 MHz,  $\text{DMSO}-d_6$ ) of compound **1**

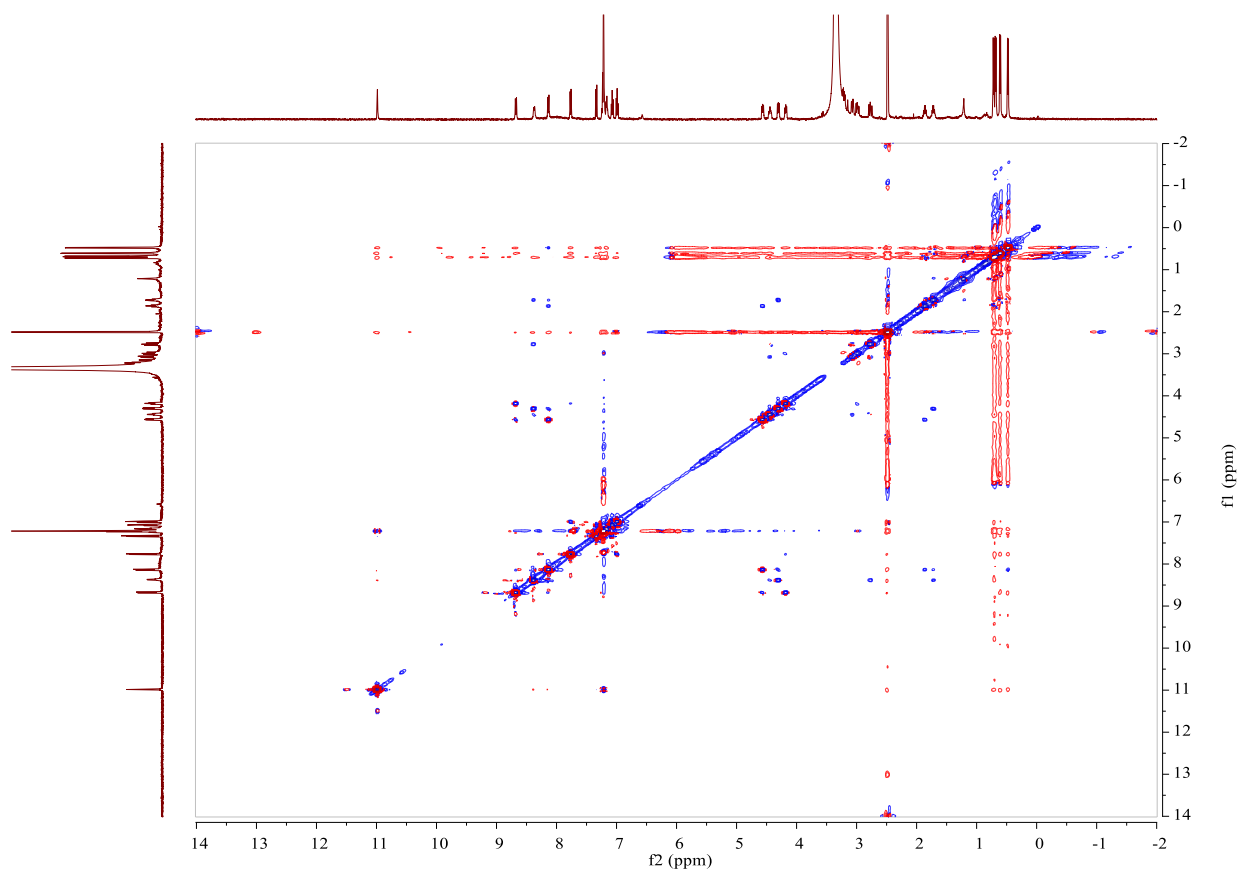

**Figure S9.** NOESY spectrum (600 MHz, DMSO-*d*<sub>6</sub>) of compound **1**

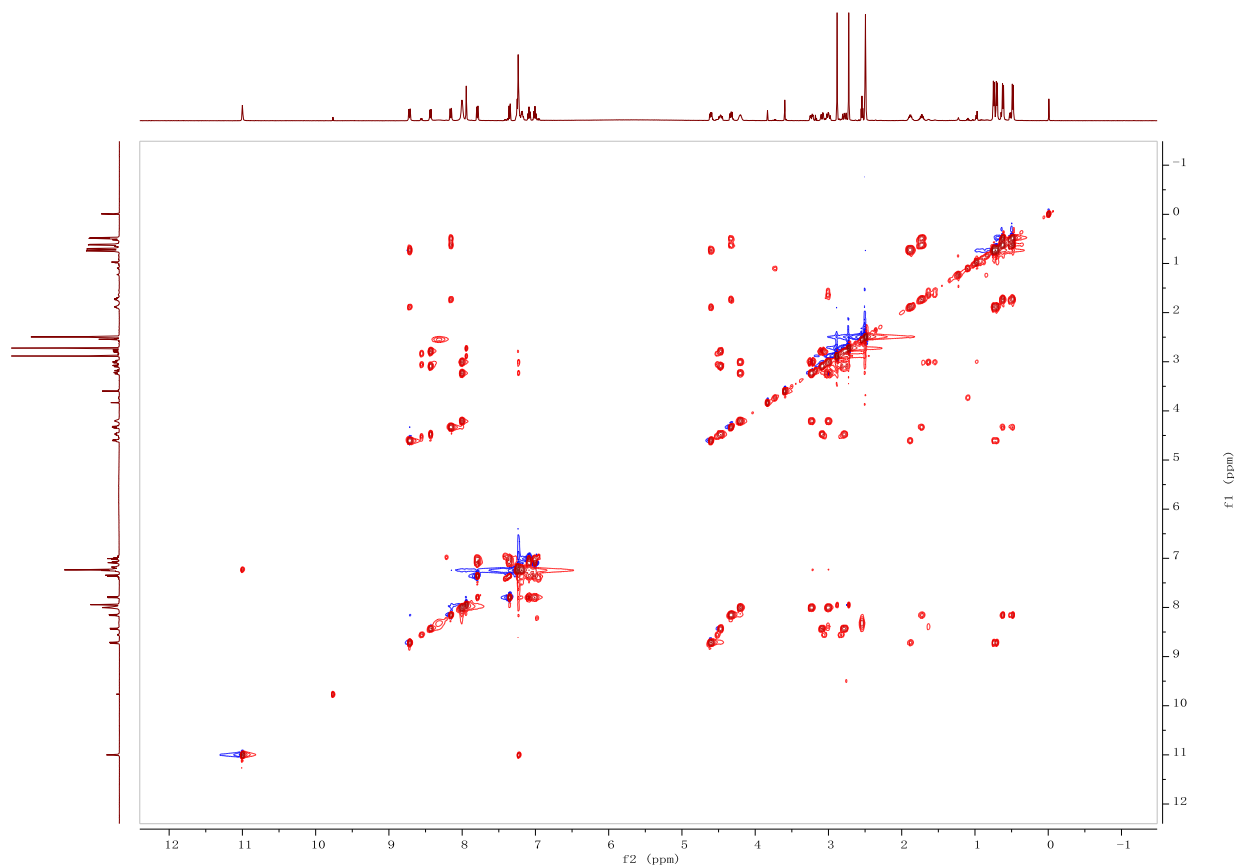

**Figure S10.** TOCSY spectrum (600 MHz, DMSO-*d*<sub>6</sub>) of compound **1**

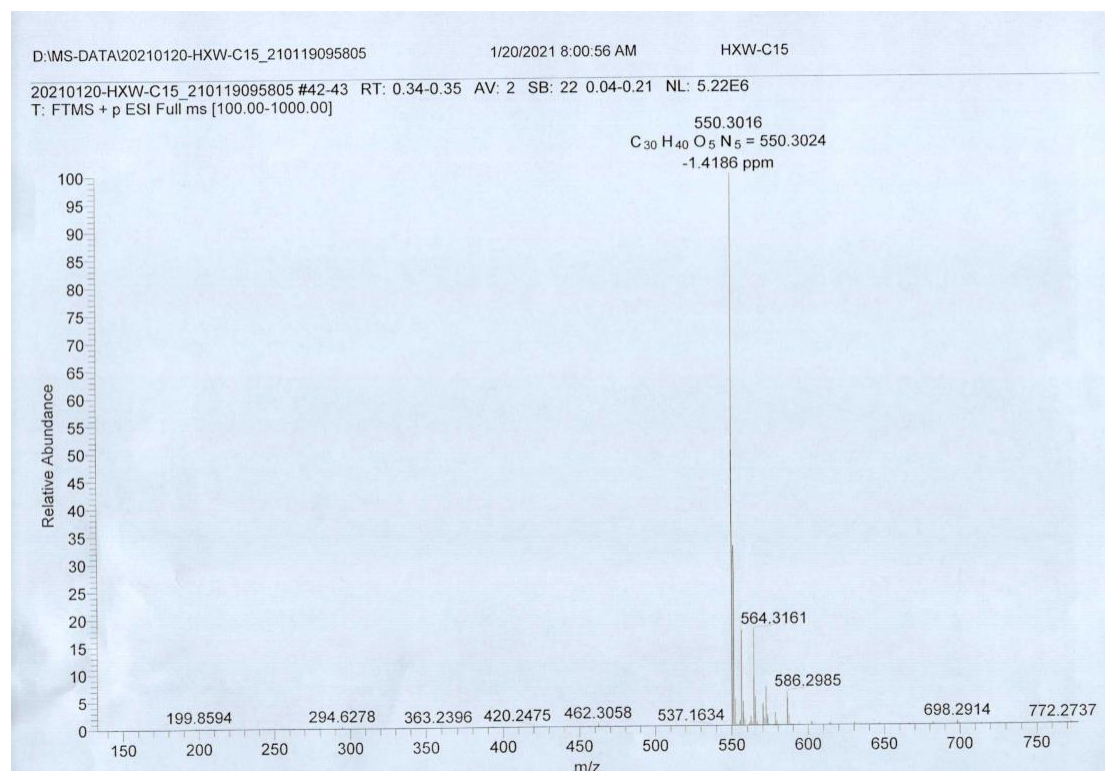



**Figure S11.** HRESIMS spectrum of compound **1**.

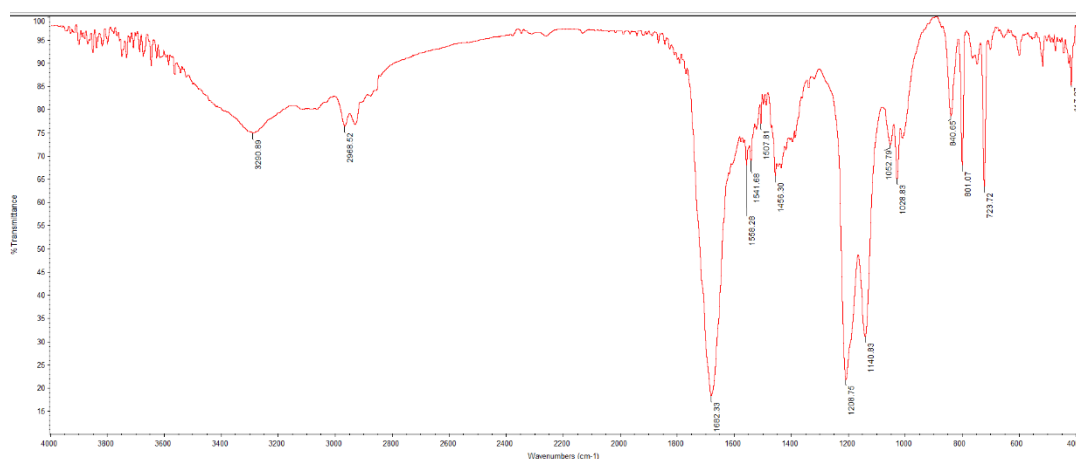

**Figure S12.** IR spectrum of compound **1**.

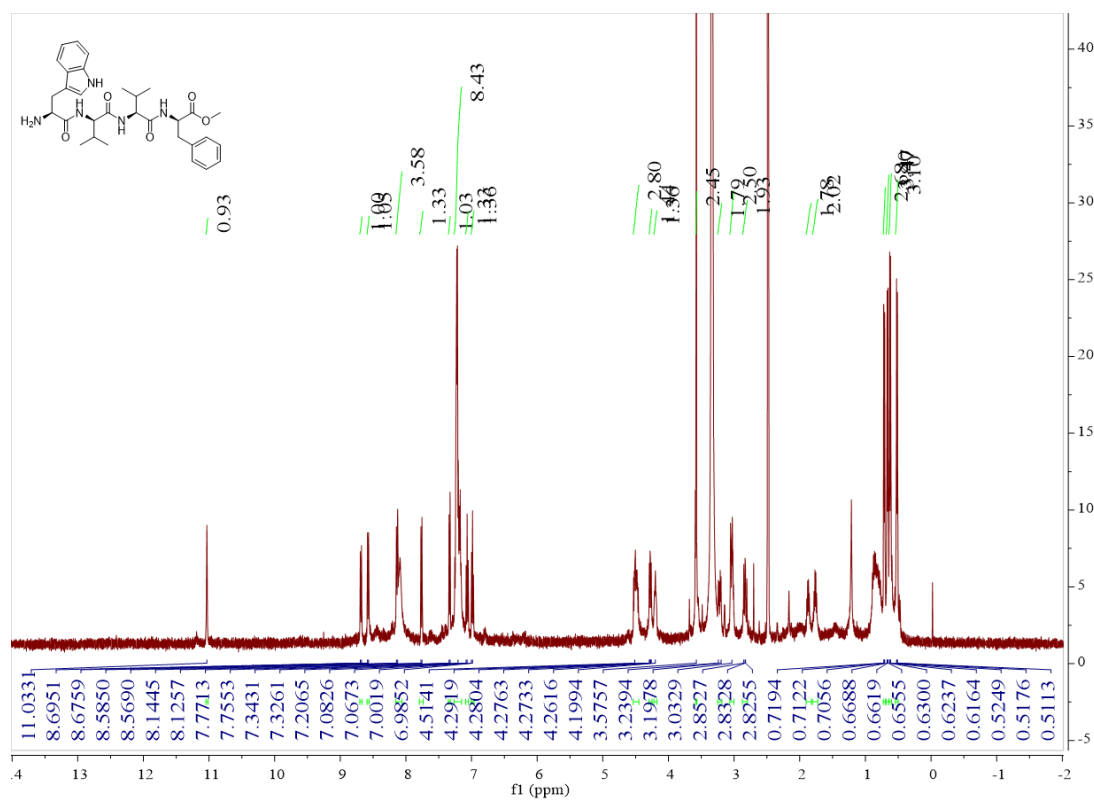

**Figure S13.** <sup>1</sup>H-NMR spectrum (600 MHz, DMSO-*d*<sub>6</sub>) of compound **2**

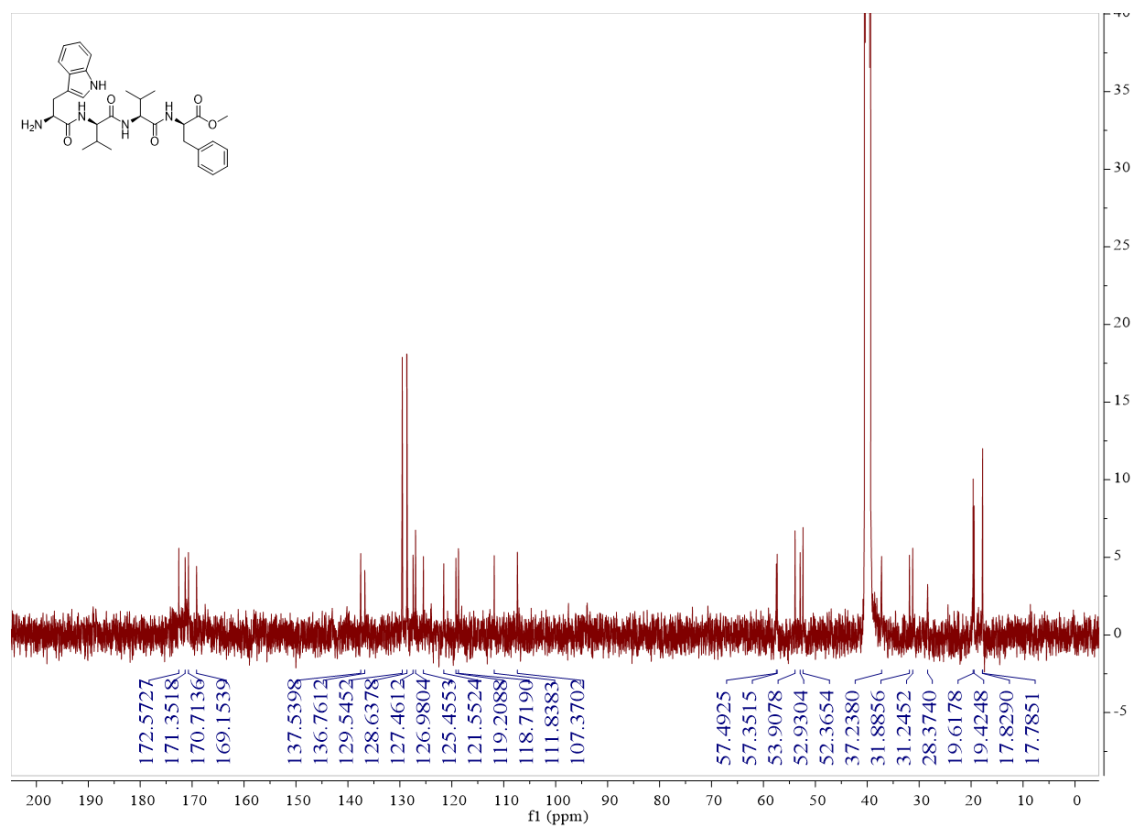

**Figure S14.** <sup>13</sup>C-NMR spectrum (150 MHz, DMSO-*d*<sub>6</sub>) of compound **2**

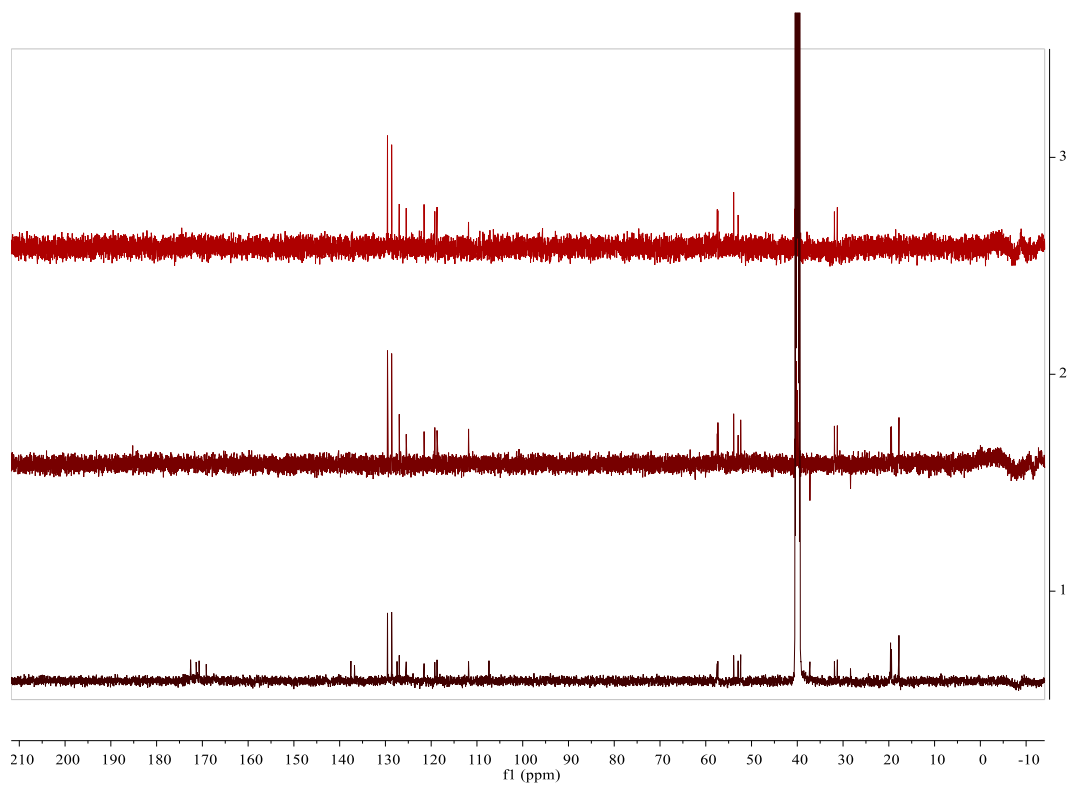

**Figure S15.** DEPT (150 MHz, DMSO-*d*<sub>6</sub>) spectrum of compound **2**

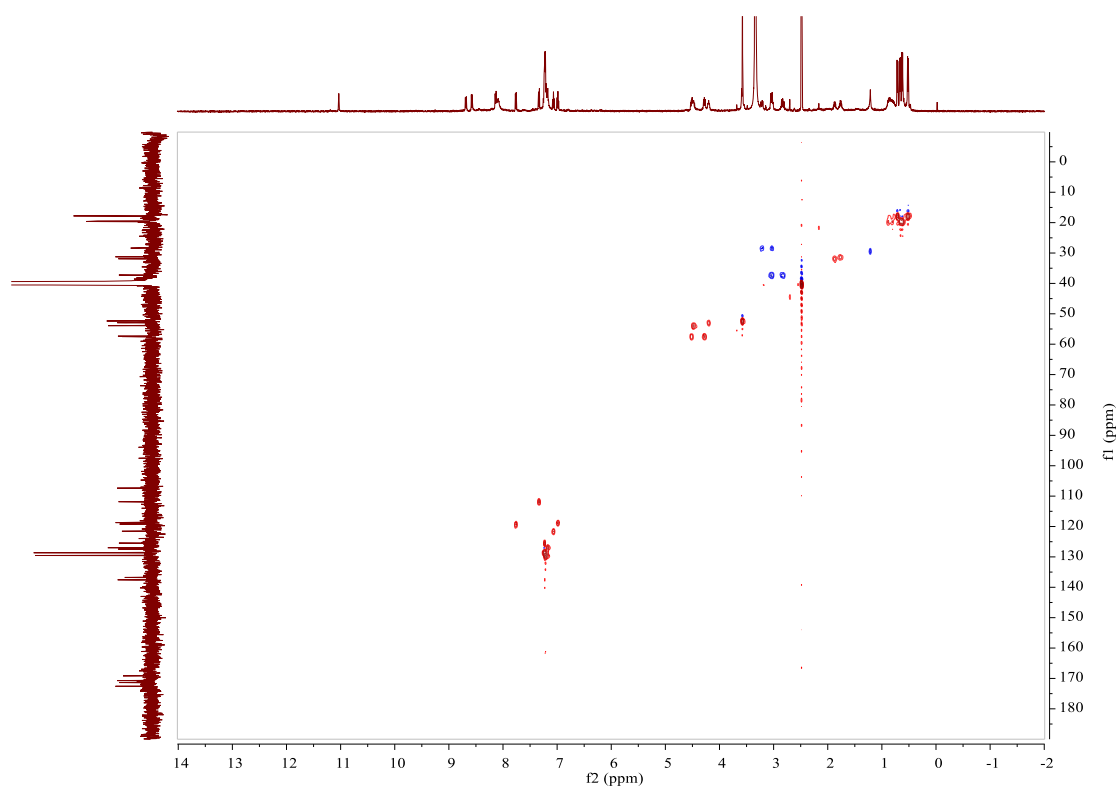

**Figure S16.** HSQC spectrum (600 MHz, DMSO- $d_6$ ) of compound **2**

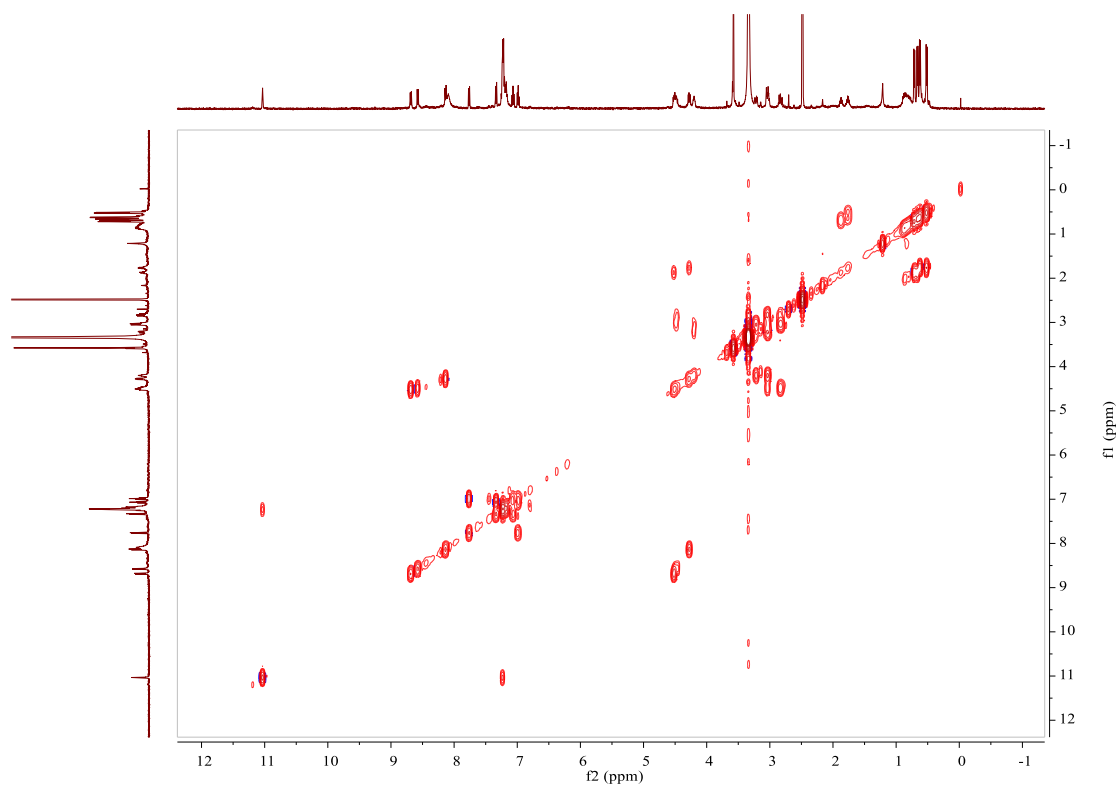

**Figure S17.**  $^1\text{H}$ - $^1\text{H}$  COSY spectrum (600 MHz, DMSO- $d_6$ ) of compound **2**

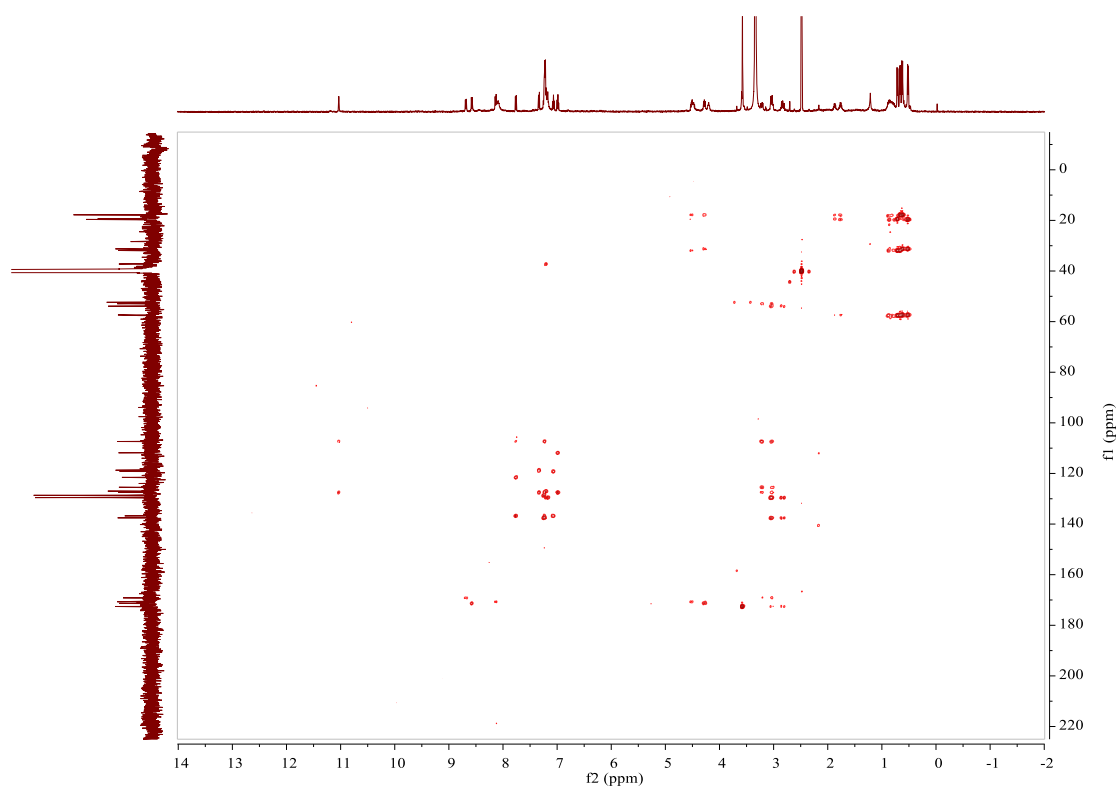

**Figure S18.** HMBC spectrum (600 MHz, DMSO-*d*<sub>6</sub>) of compound **2**

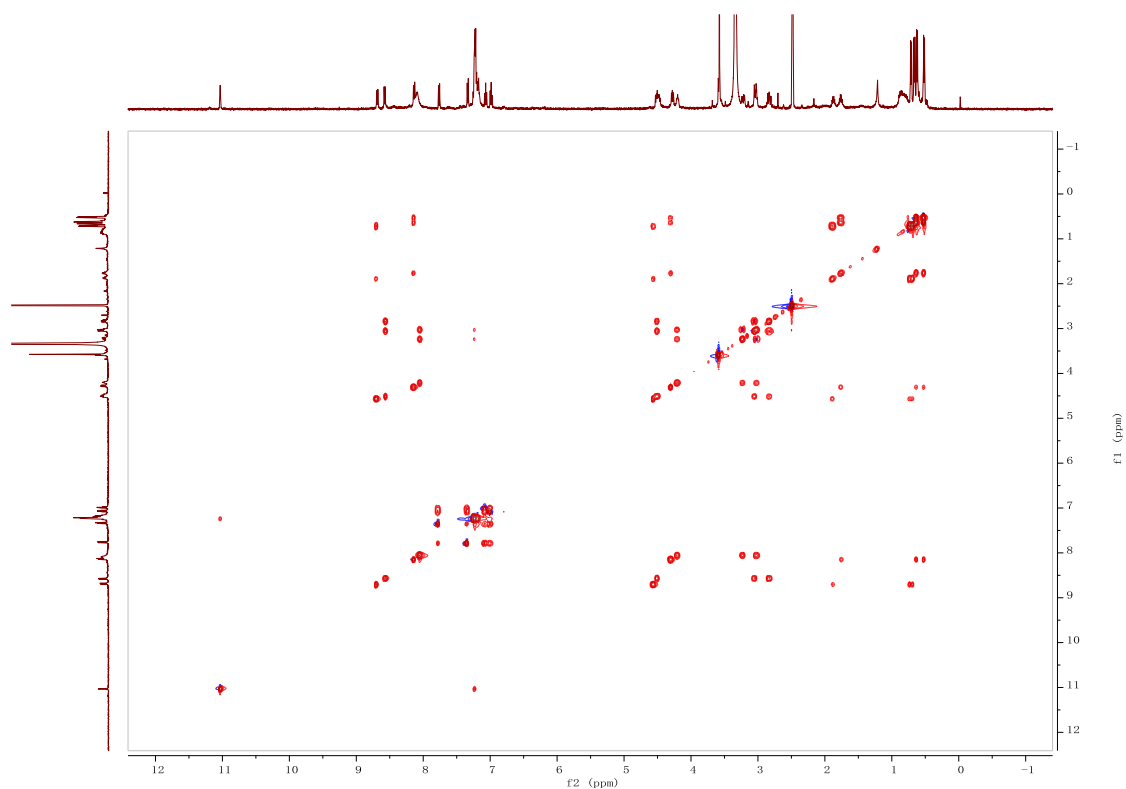

**Figure S19.** TOCSY spectrum (600 MHz, DMSO-*d*<sub>6</sub>) of compound **2**

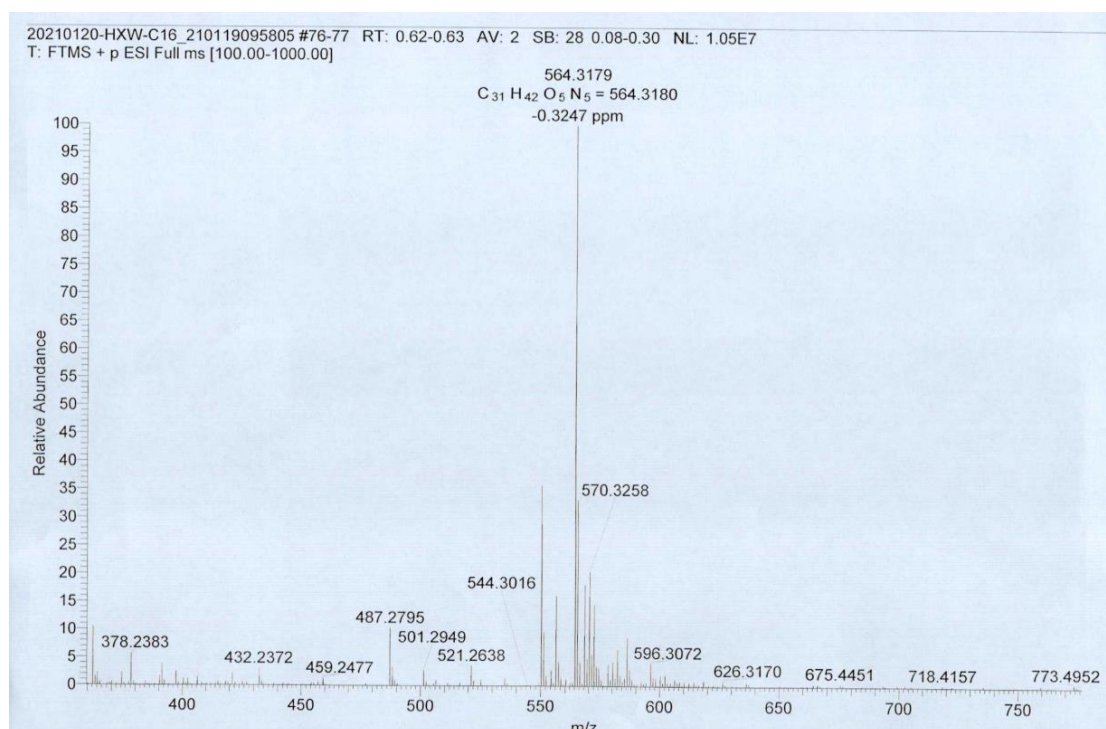

**Figure S20.** HRESIMS spectrum of compound **2**

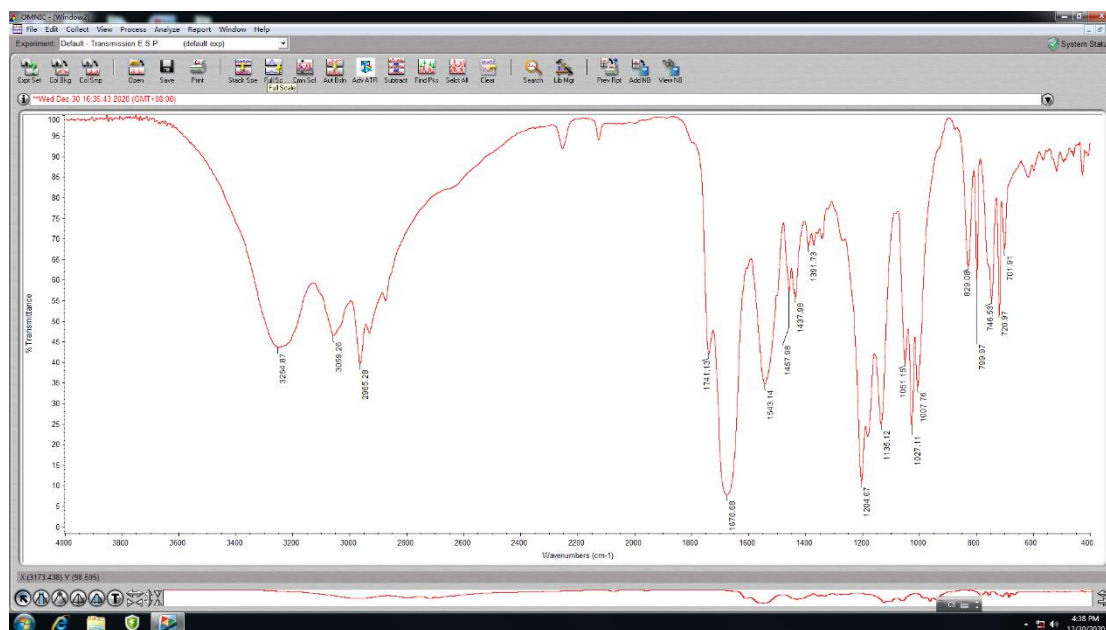

**Figure S21.** IR spectrum of compound **2**

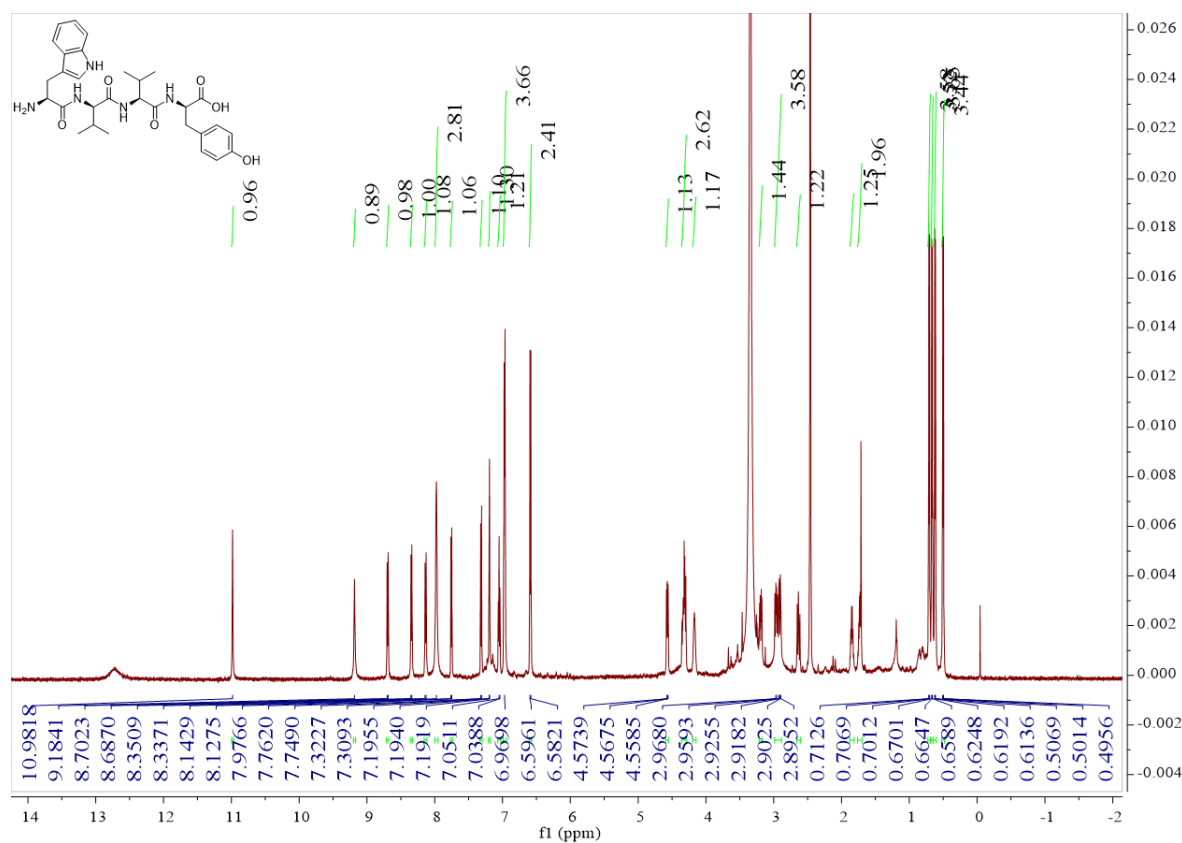

**Figure S22.** <sup>1</sup>H-NMR spectrum (600 MHz, DMSO-*d*<sub>6</sub>) of compound **3**

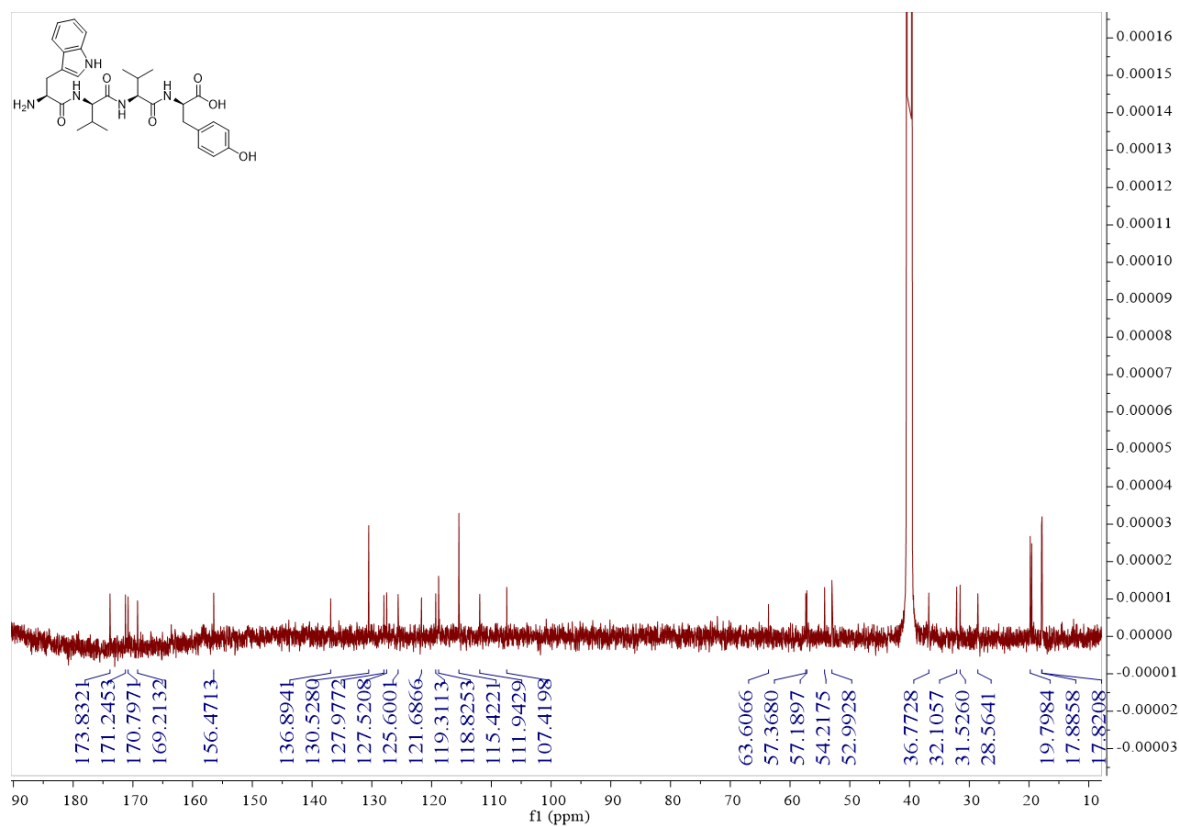

**Figure S23.** <sup>13</sup>C-NMR spectrum (150 MHz, DMSO-*d*<sub>6</sub>) of compound **3**

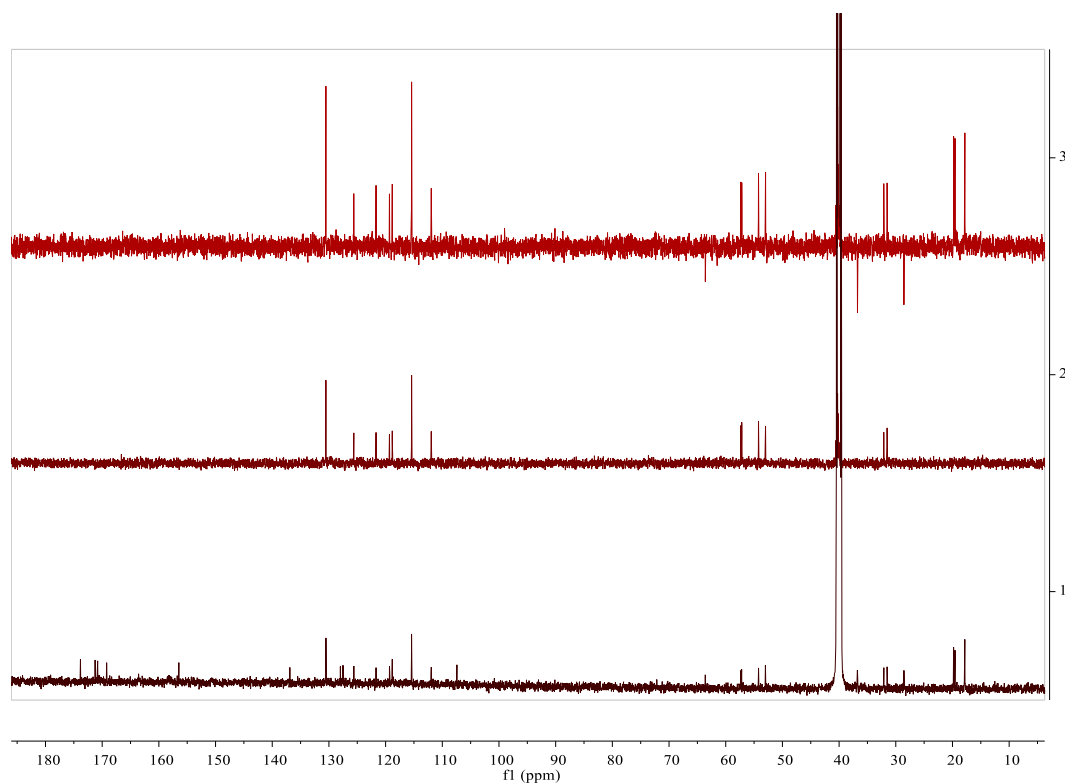

**Figure S24.** DEPT (150 MHz, DMSO- $d_6$ ) spectrum of compound **3**

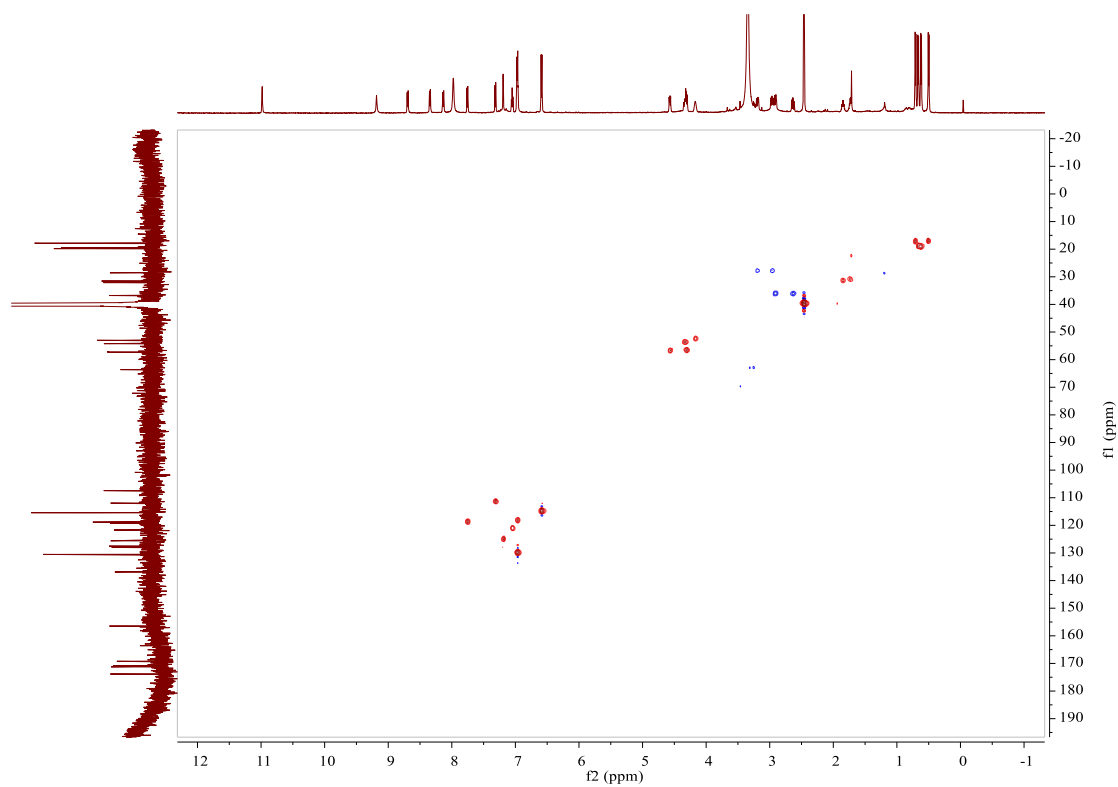

**Figure S25.** HSQC spectrum (600 MHz, DMSO- $d_6$ ) of compound **3**

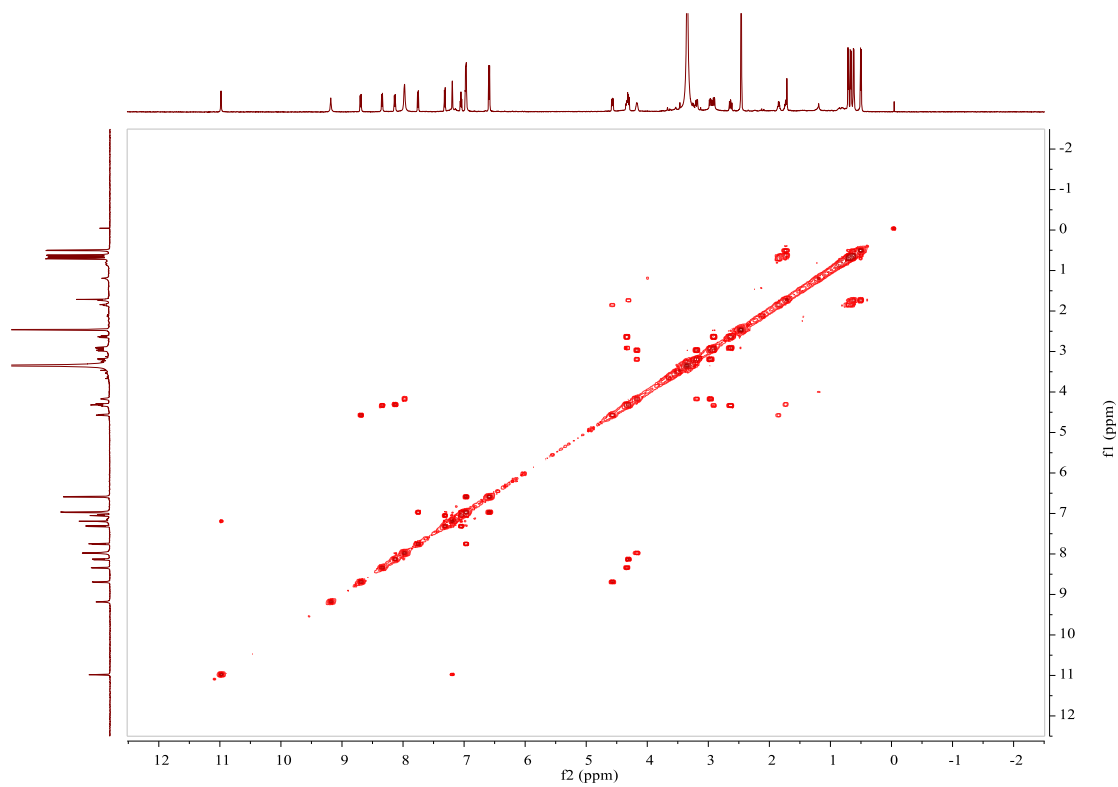

**Figure S26.**  $^1\text{H}$ - $^1\text{H}$  COSY spectrum (600 MHz,  $\text{DMSO-}d_6$ ) of compound **3**

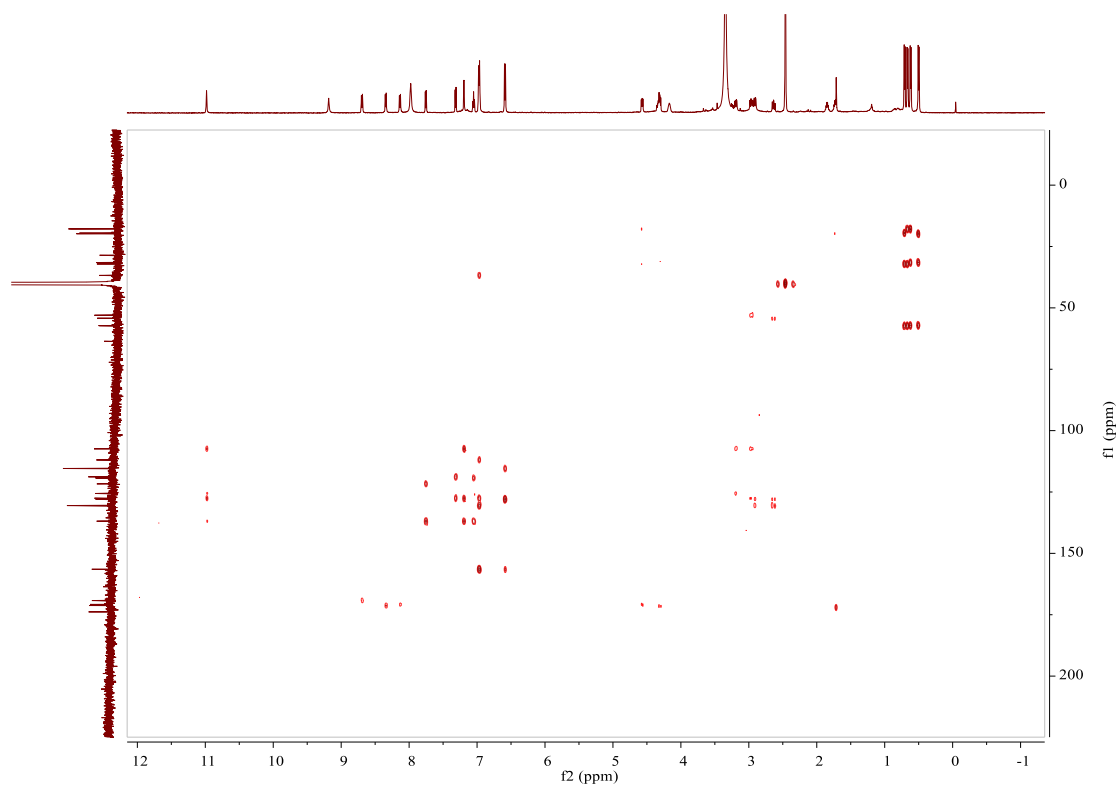

**Figure S27.** HMBC spectrum (600 MHz,  $\text{DMSO-}d_6$ ) of compound **3**



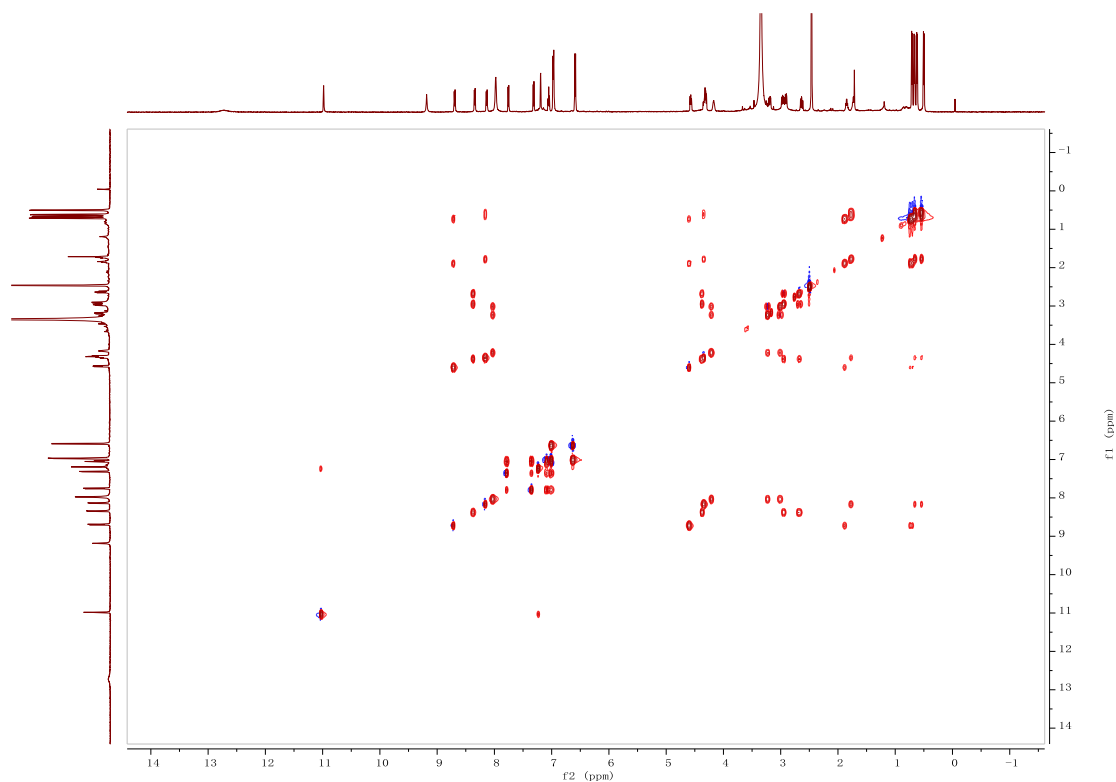

**Figure S28.** TOCSY spectrum (600 MHz, DMSO- $d_6$ ) of compound **3**

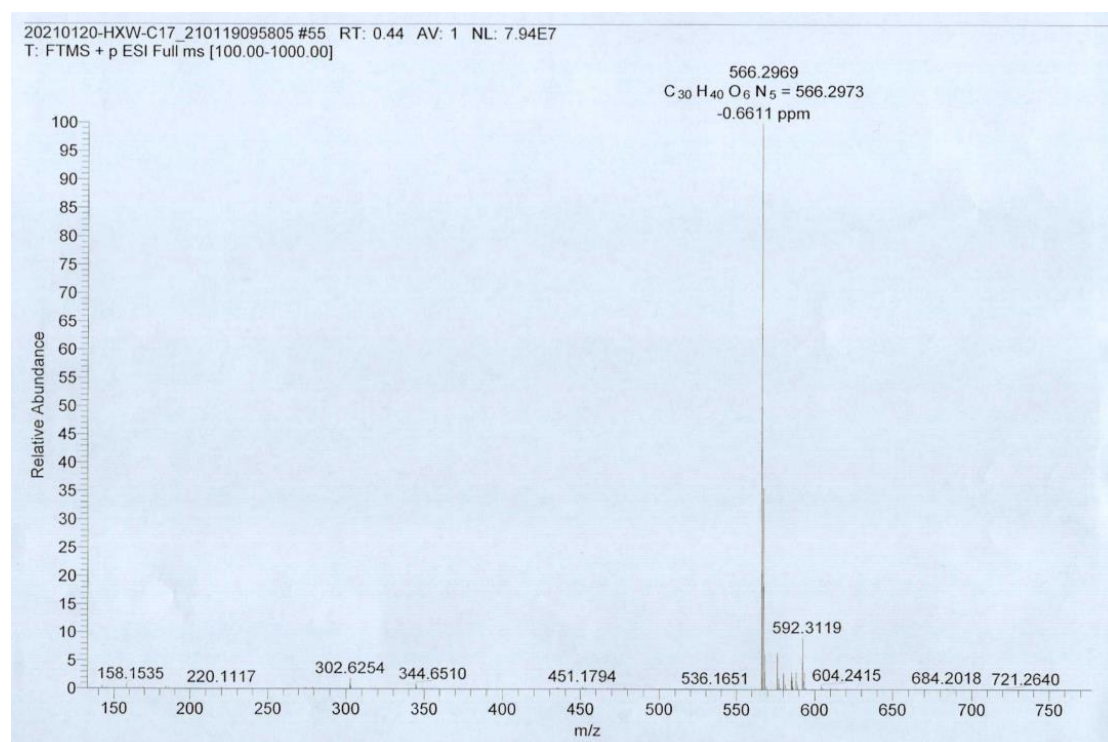

**Figure S29.** HRESIMS spectrum of compound **3**

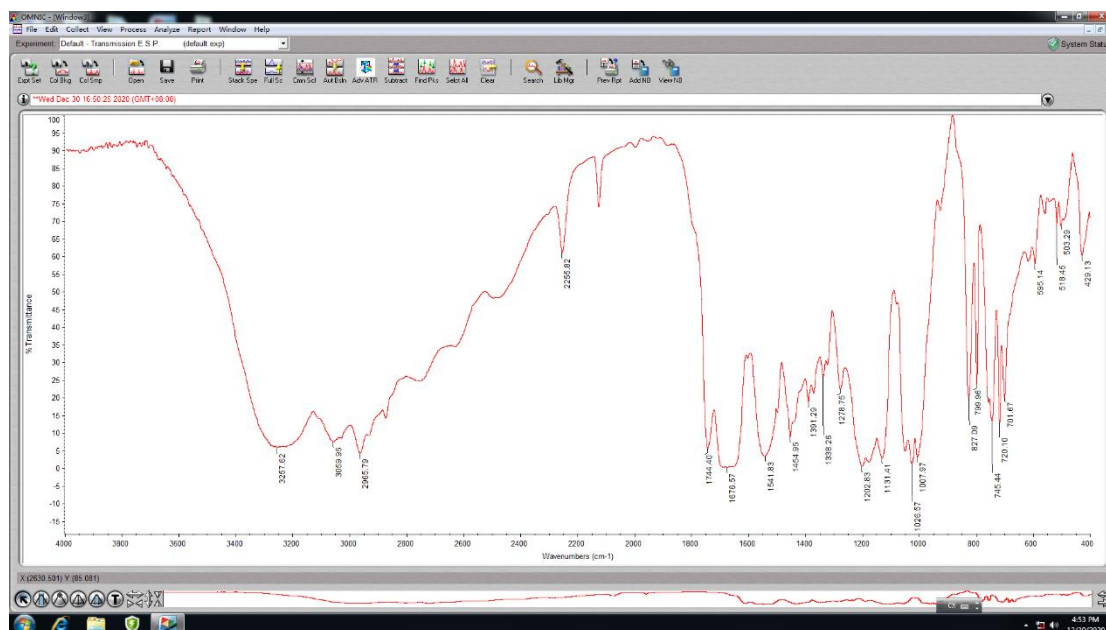

**Figure S30.** IR spectrum of compound **3**

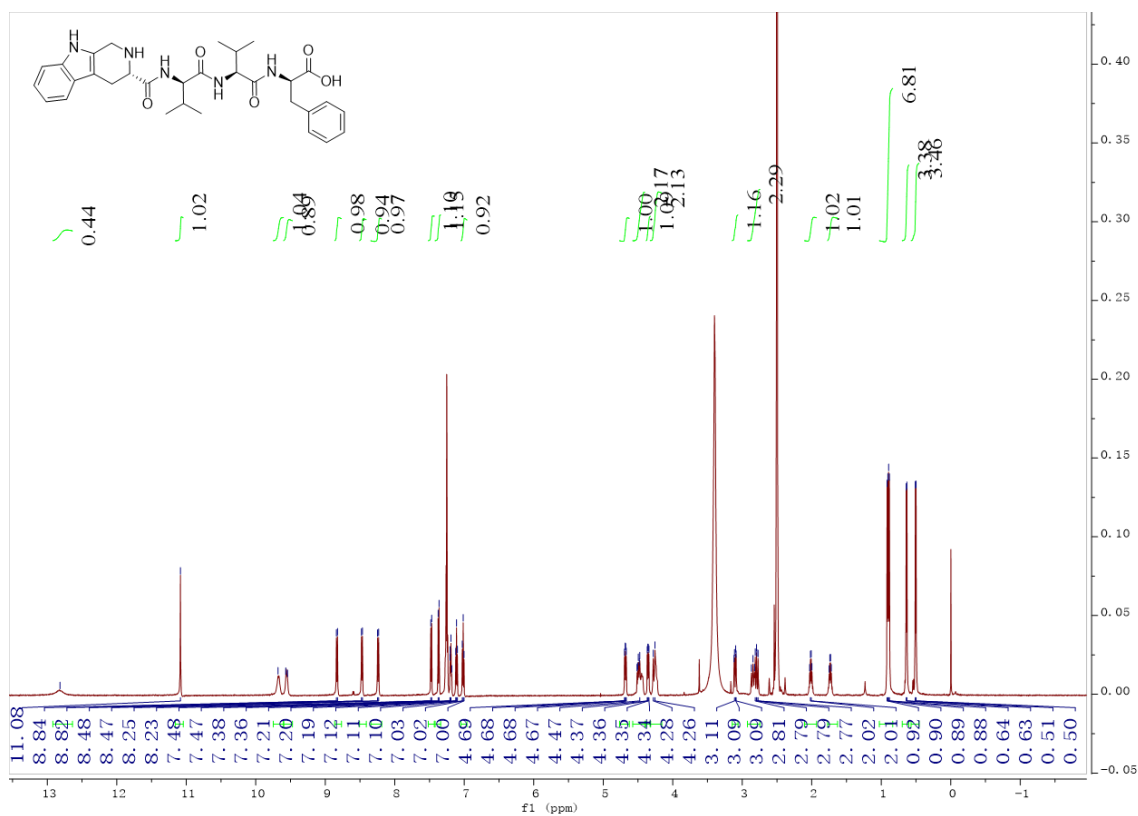

**Figure S31.** <sup>1</sup>H-NMR spectrum (600 MHz, DMSO-*d*<sub>6</sub>) of compound **4**

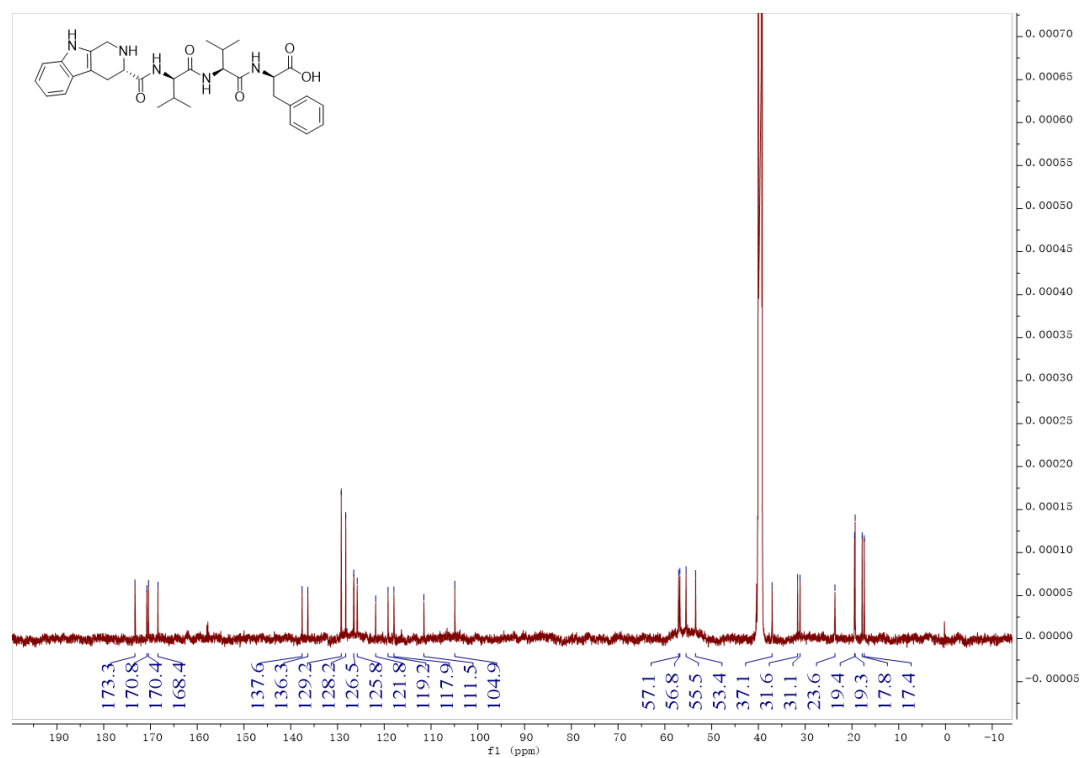

**Figure S32.** <sup>13</sup>C-NMR spectrum (150 MHz, DMSO-*d*<sub>6</sub>) of compound **4**

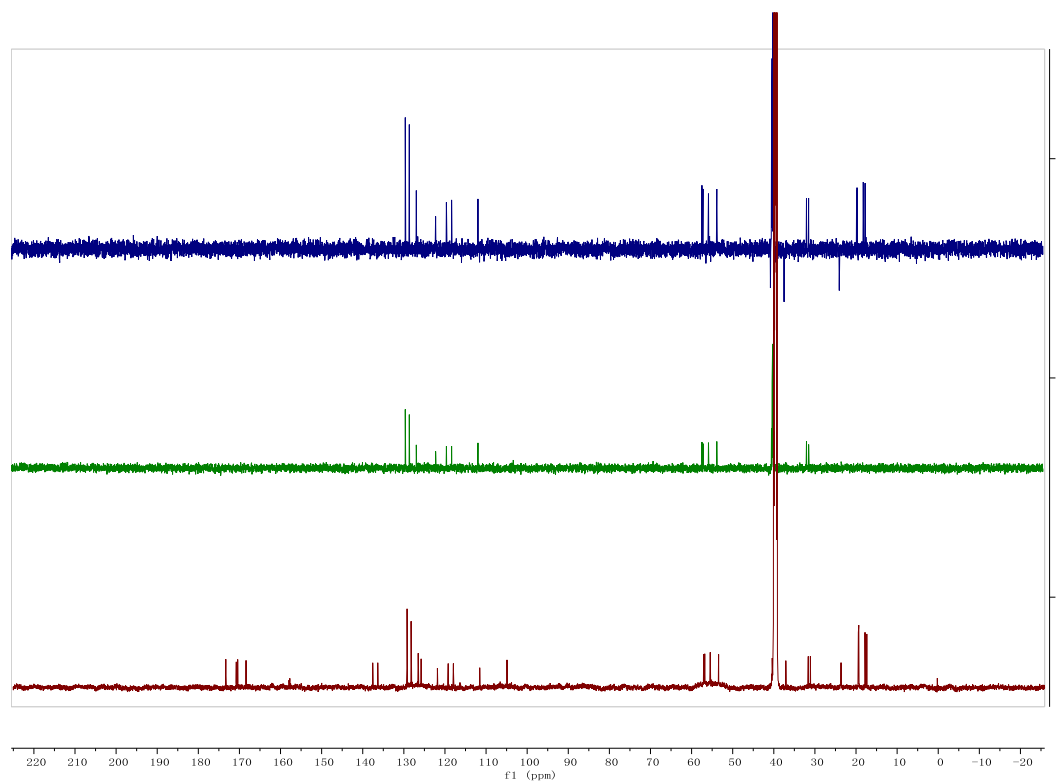

**Figure S33.** DEPT (150 MHz, DMSO-*d*<sub>6</sub>) spectrum of compound **4**

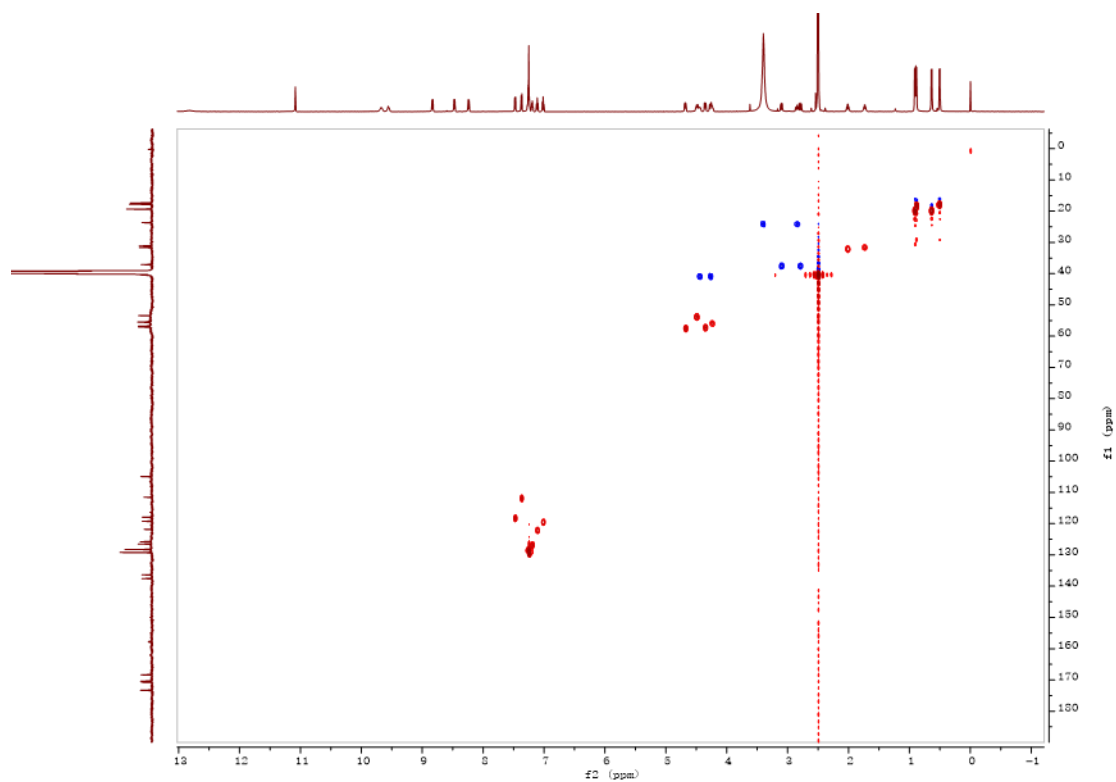

**Figure S34.** HSQC spectrum (600 MHz, DMSO-*d*<sub>6</sub>) of compound **4**

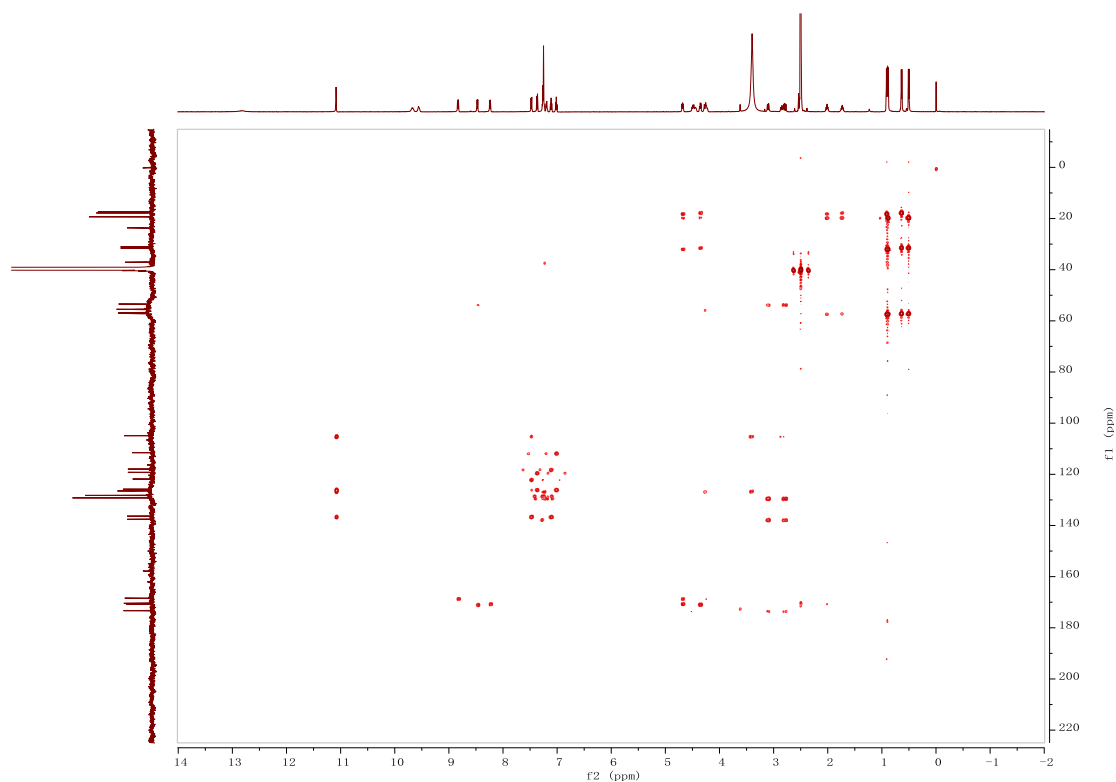

**Figure S35.** HMBC spectrum (600 MHz, DMSO-*d*<sub>6</sub>) of compound **4**

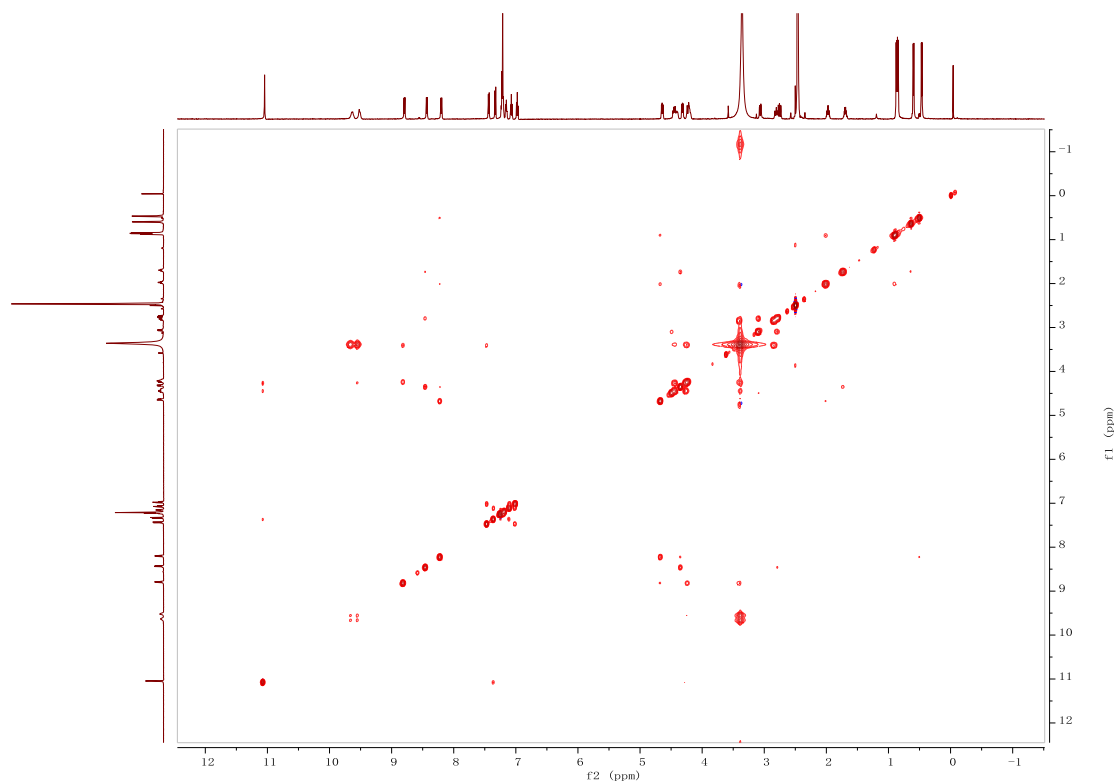

**Figure S36.** NOESY spectrum (600 MHz, DMSO-*d*<sub>6</sub>) of compound **4**

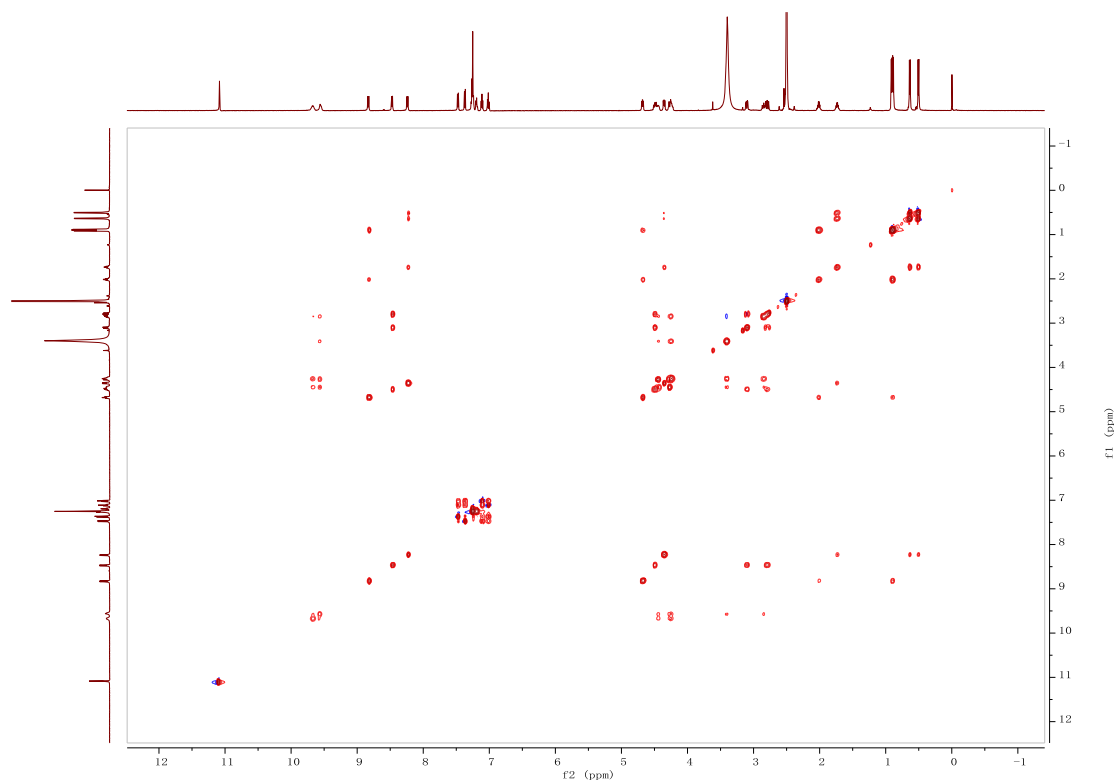

**Figure S37.** TOCSY spectrum (600 MHz, DMSO-*d*<sub>6</sub>) of compound **4**

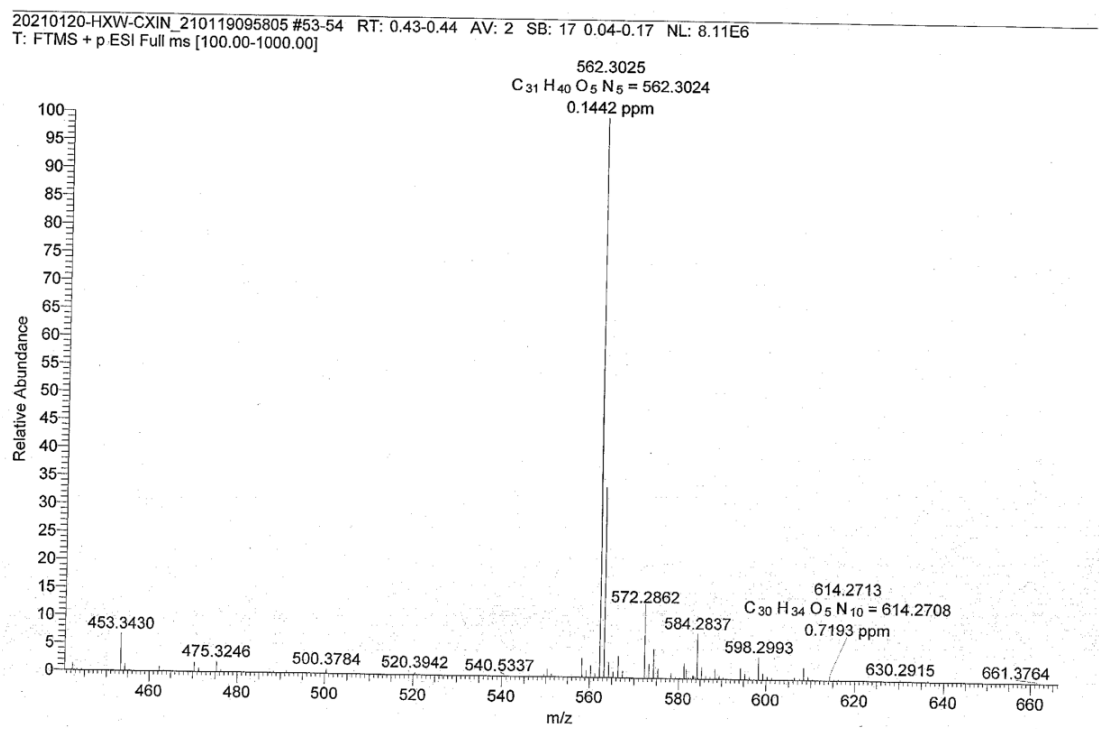

**Figure S38.** HRESIMS spectrum of compound **4**

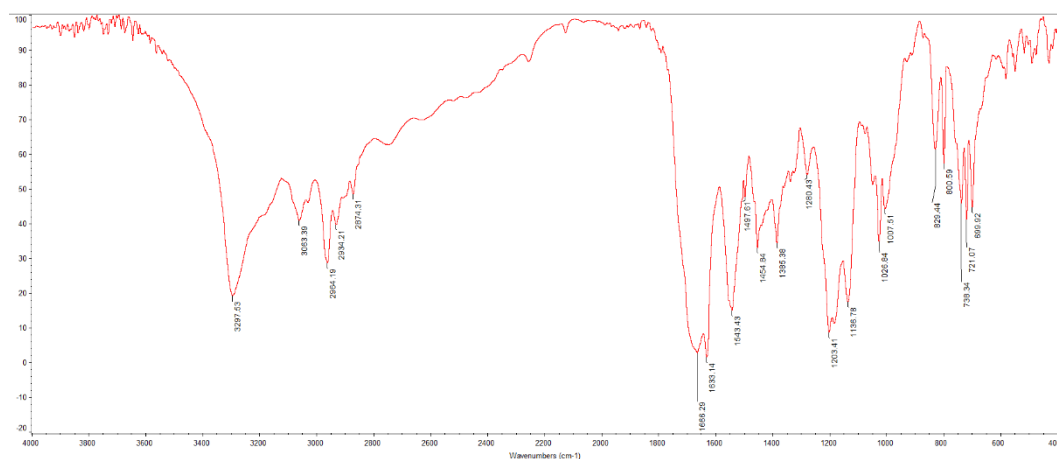

**Figure S39.** IR spectrum of compound **4**

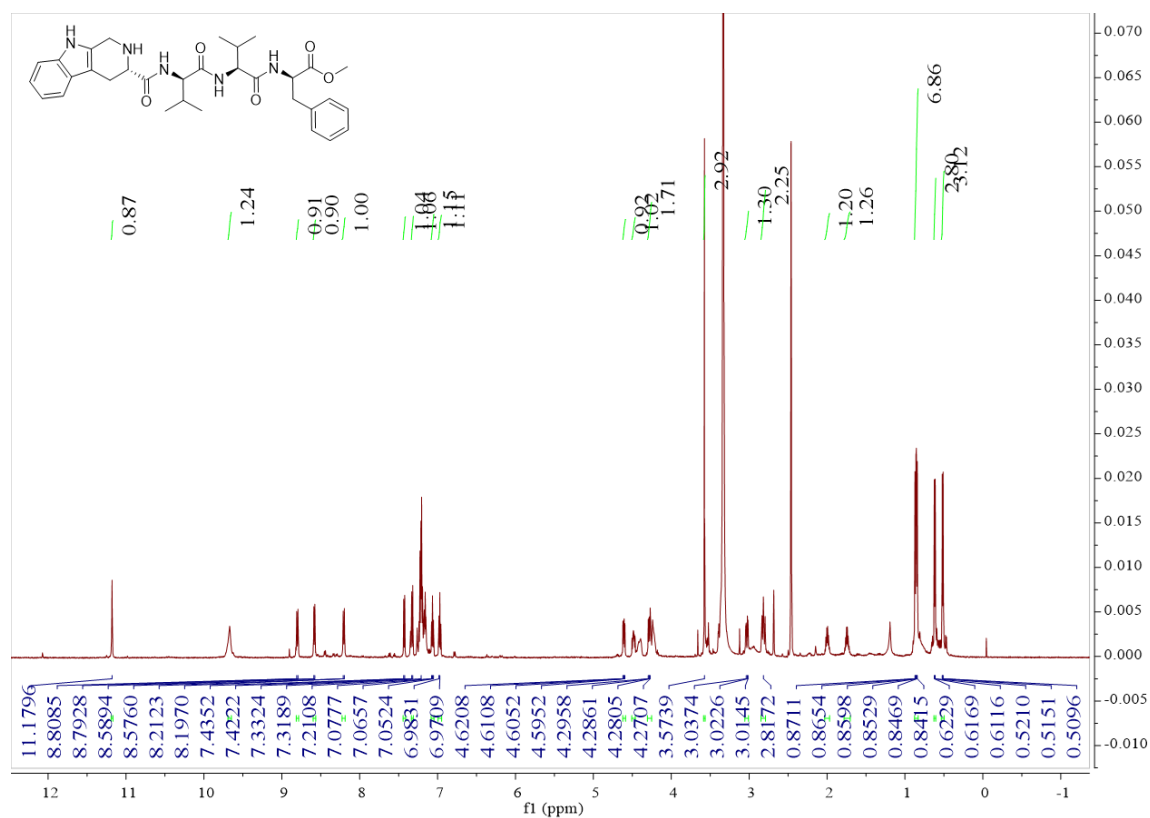

**Figure S40.** <sup>1</sup>H-NMR spectrum (600 MHz, DMSO-*d*<sub>6</sub>) of compound **5**

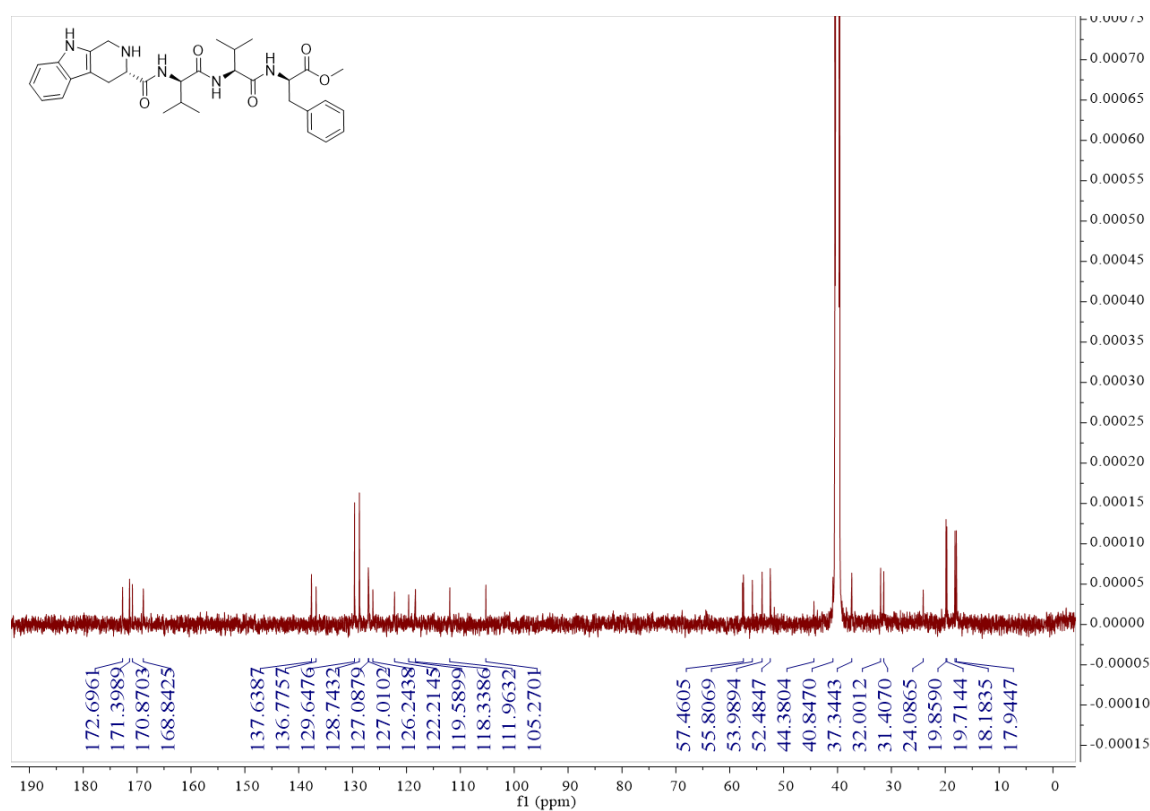

**Figure S41.** <sup>13</sup>C-NMR spectrum (150 MHz, DMSO-*d*<sub>6</sub>) of compound **5**

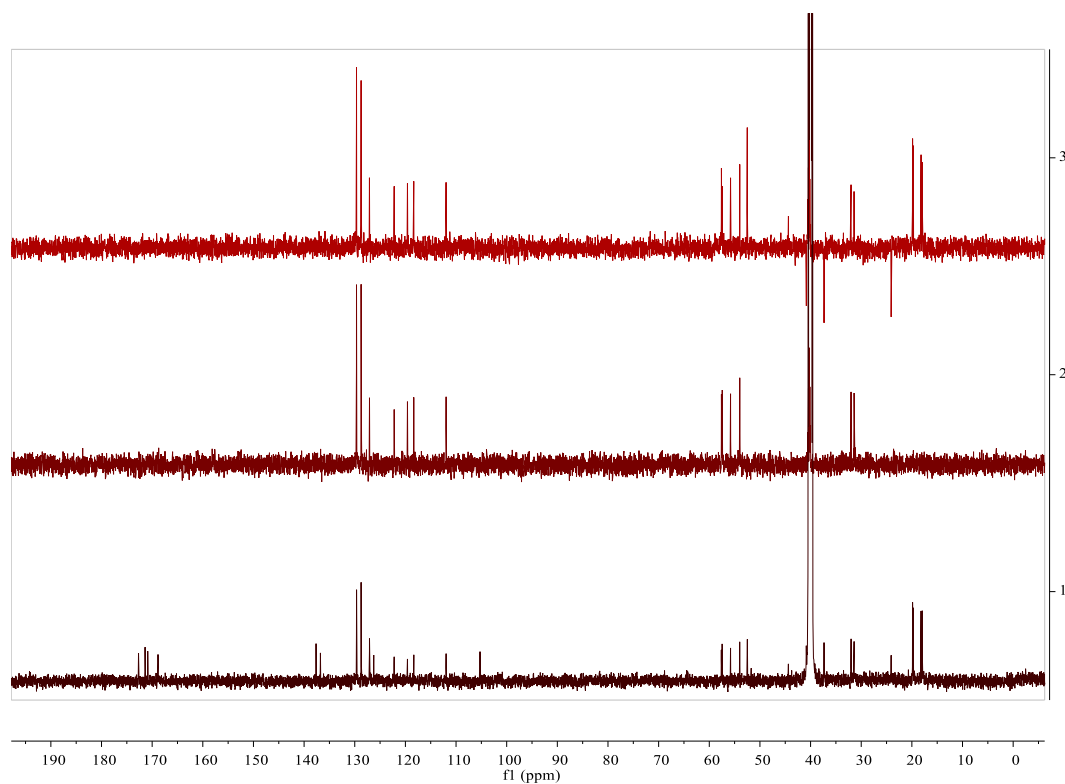

**Figure S42.** DEPT (150 MHz, DMSO- $d_6$ ) spectrum of compound **5**

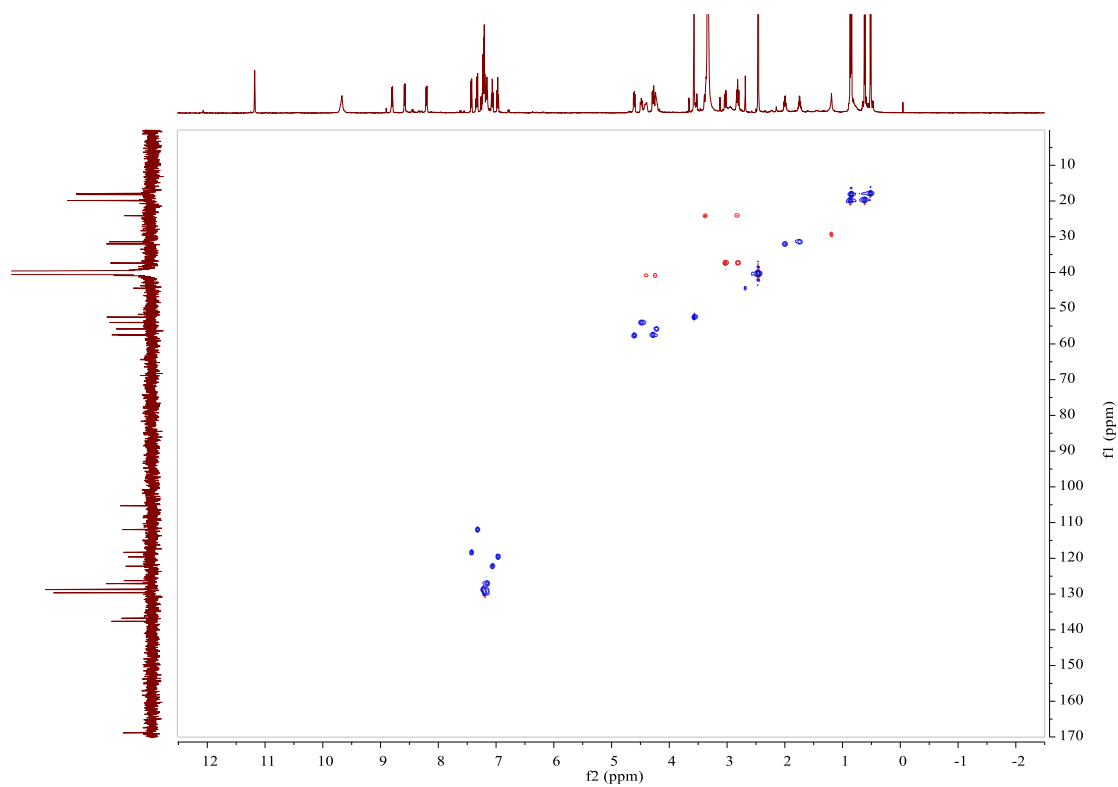

**Figure S43.** HSQC spectrum (600 MHz, DMSO- $d_6$ ) of compound **5**



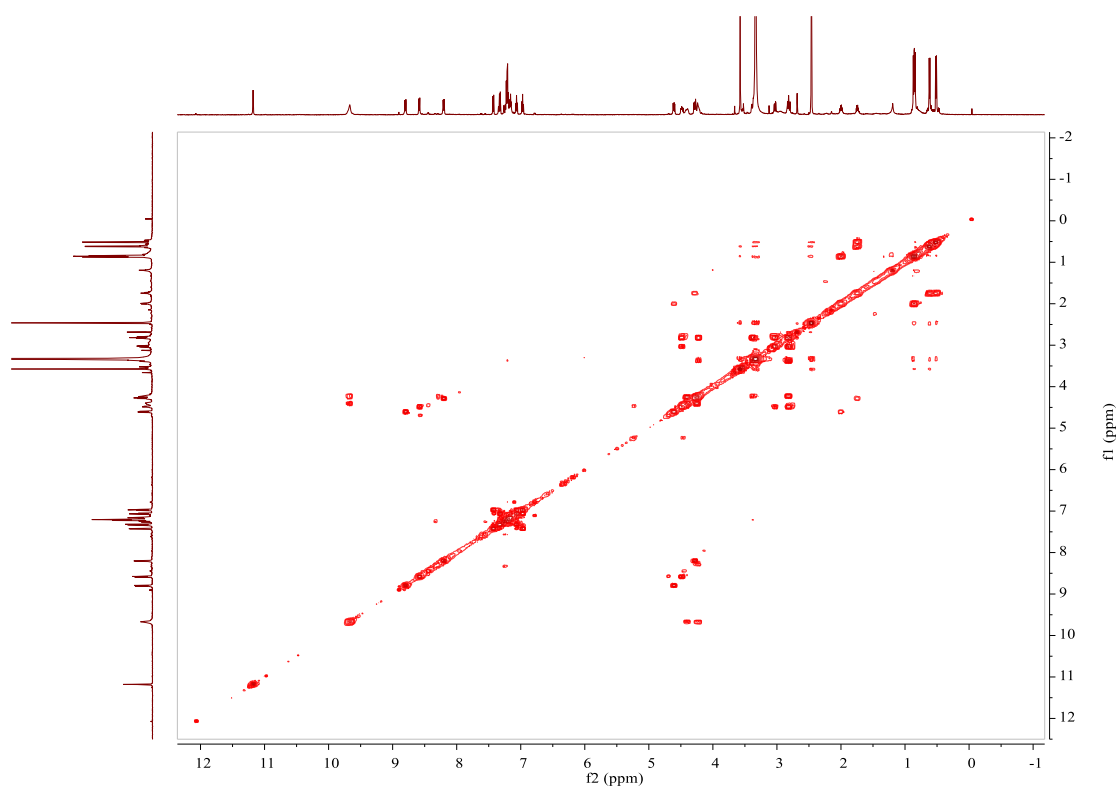

**Figure S44.**  $^1\text{H}$ - $^1\text{H}$  COSY spectrum (600 MHz,  $\text{DMSO}-d_6$ ) of compound **5**

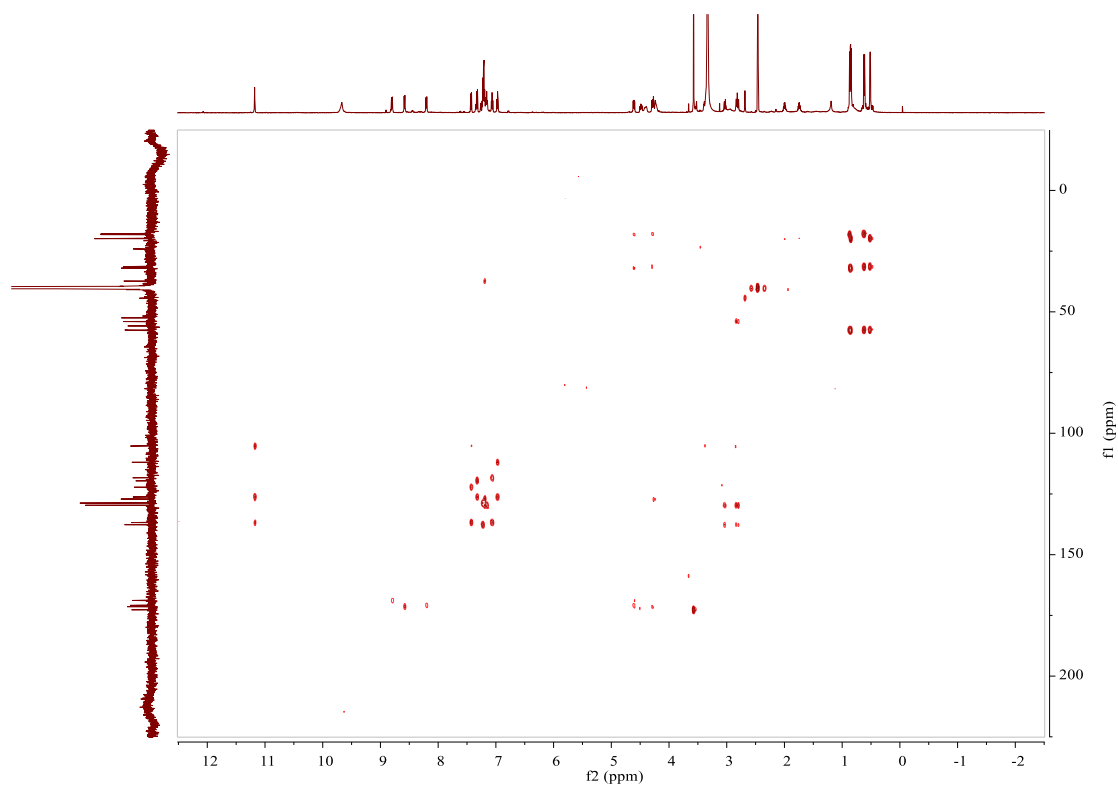

**Figure S45.** HMBC spectrum (600 MHz,  $\text{DMSO}-d_6$ ) of compound **5**

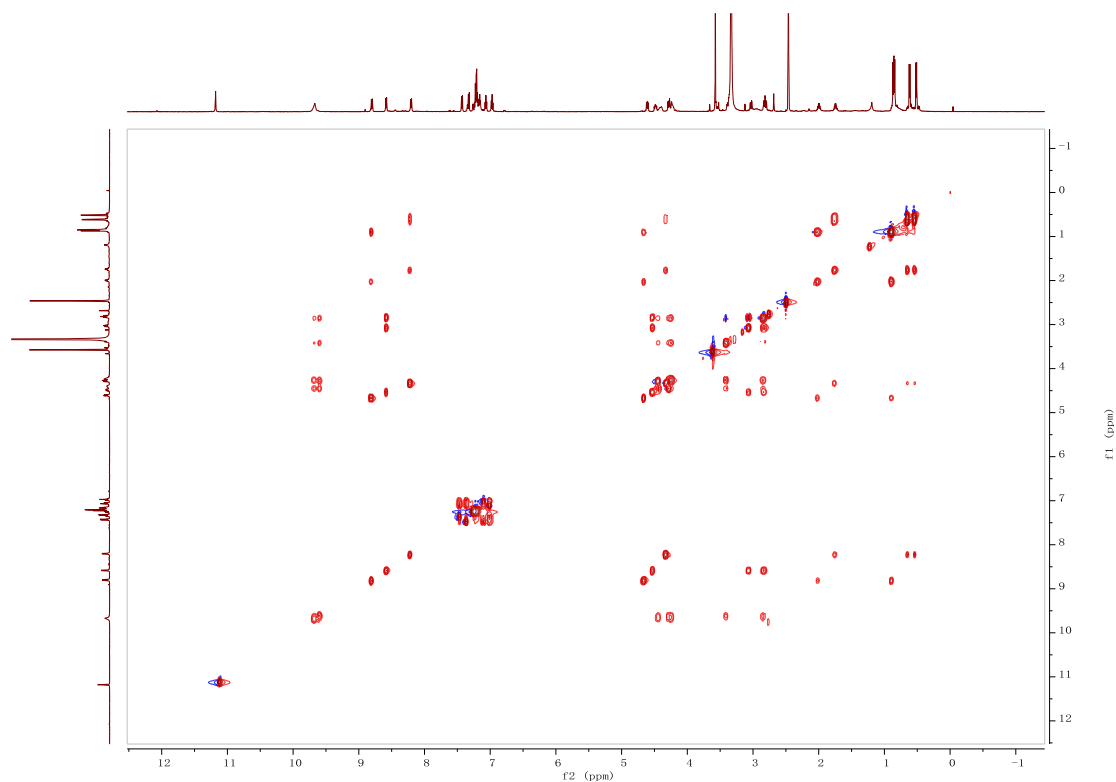

**Figure S46.** TOCSY spectrum (600 MHz, DMSO- $d_6$ ) of compound **5**

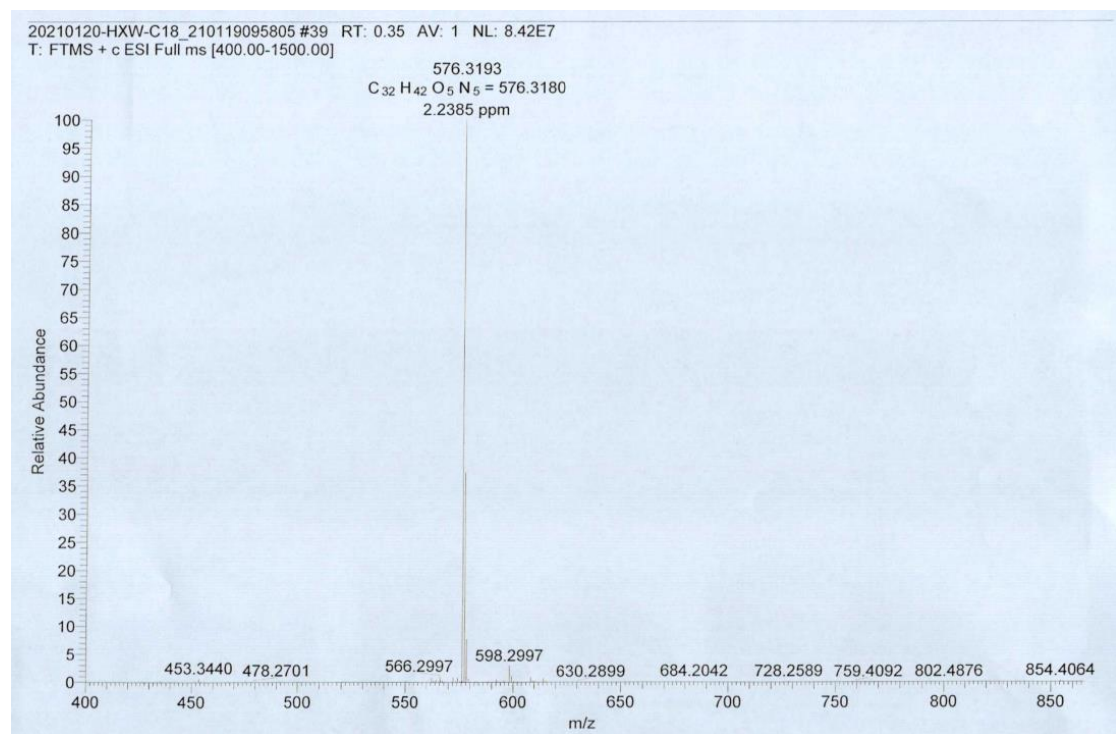

**Figure S47.** HRESIMS spectrum of compound **5**

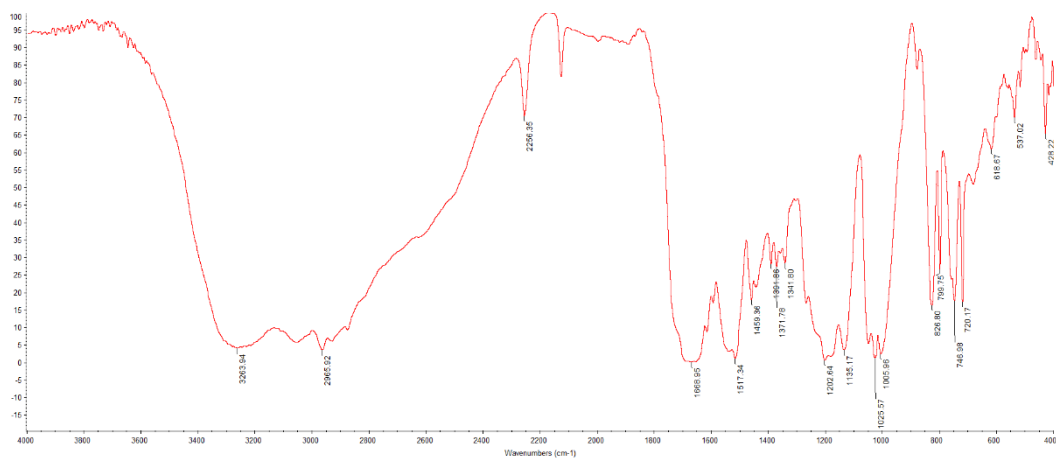

**Figure S48.** IR spectrum of compound **5**

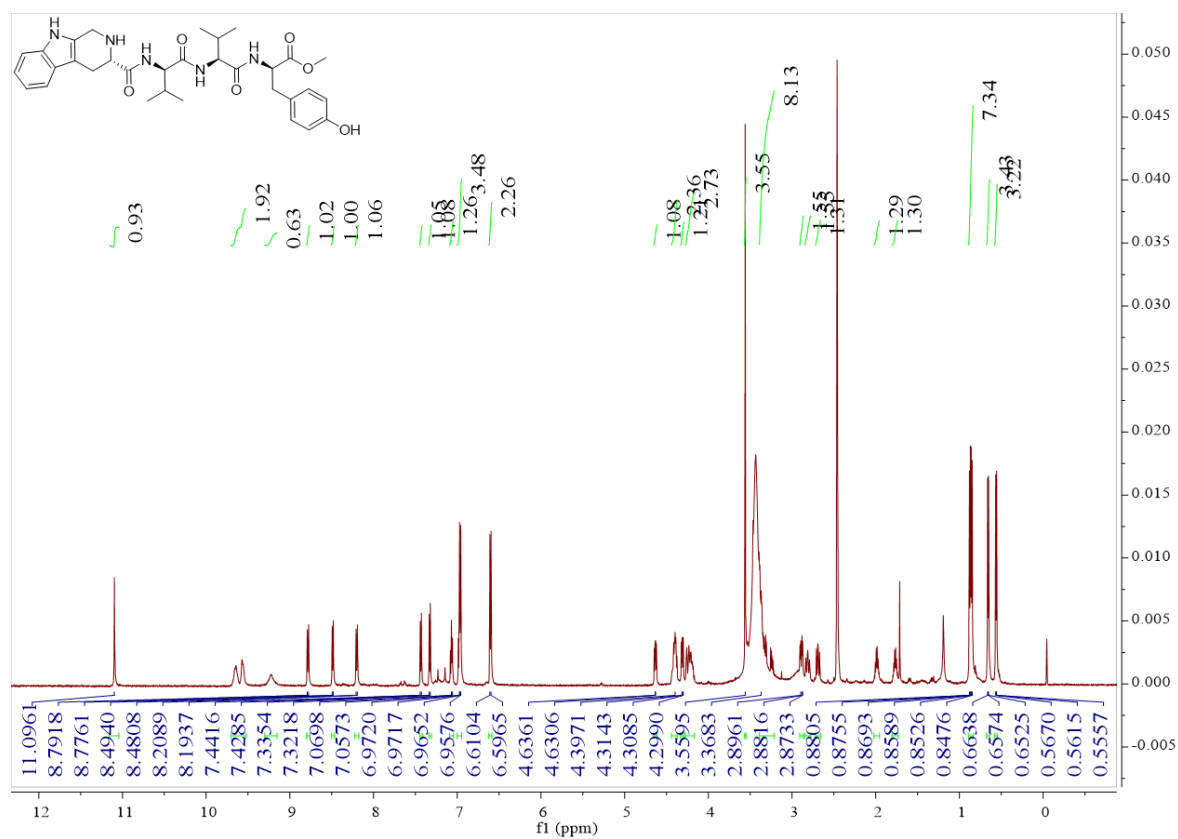

**Figure S49.**  $^1\text{H}$ -NMR spectrum (600 MHz,  $\text{DMSO}-d_6$ ) of compound **6**

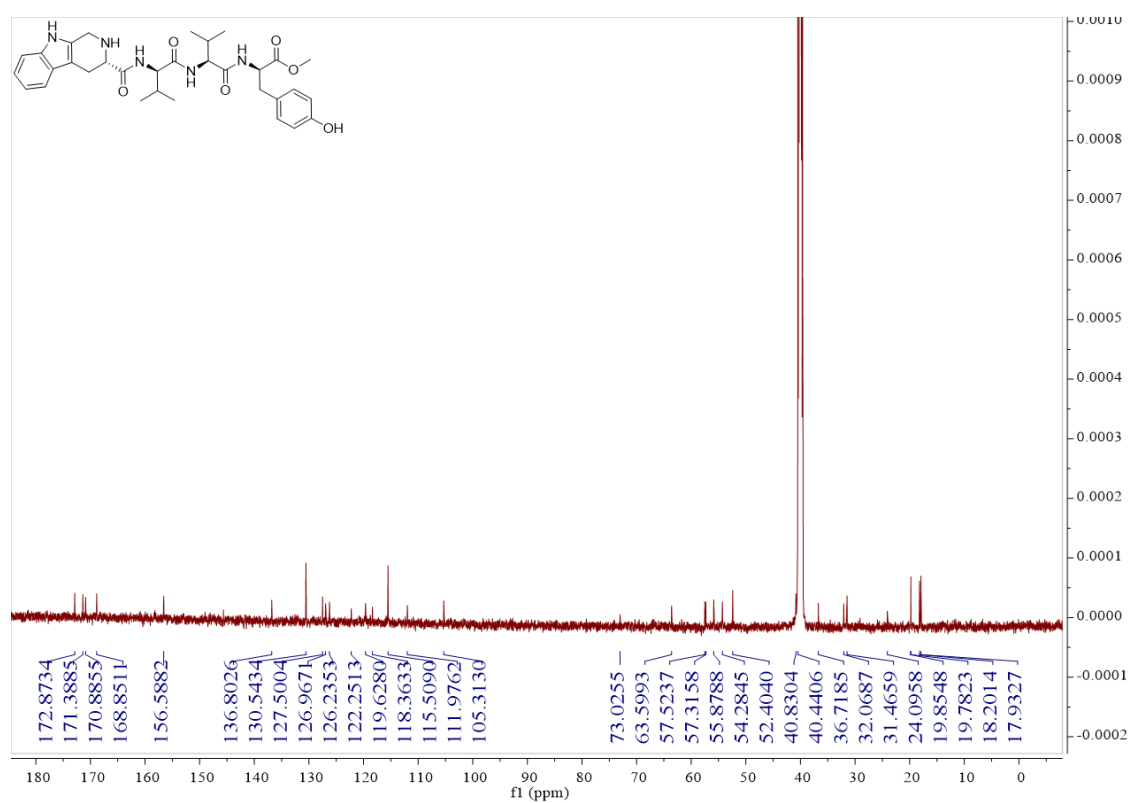

**Figure S50.** <sup>13</sup>C-NMR spectrum (150 MHz, DMSO-*d*<sub>6</sub>) of compound **6**

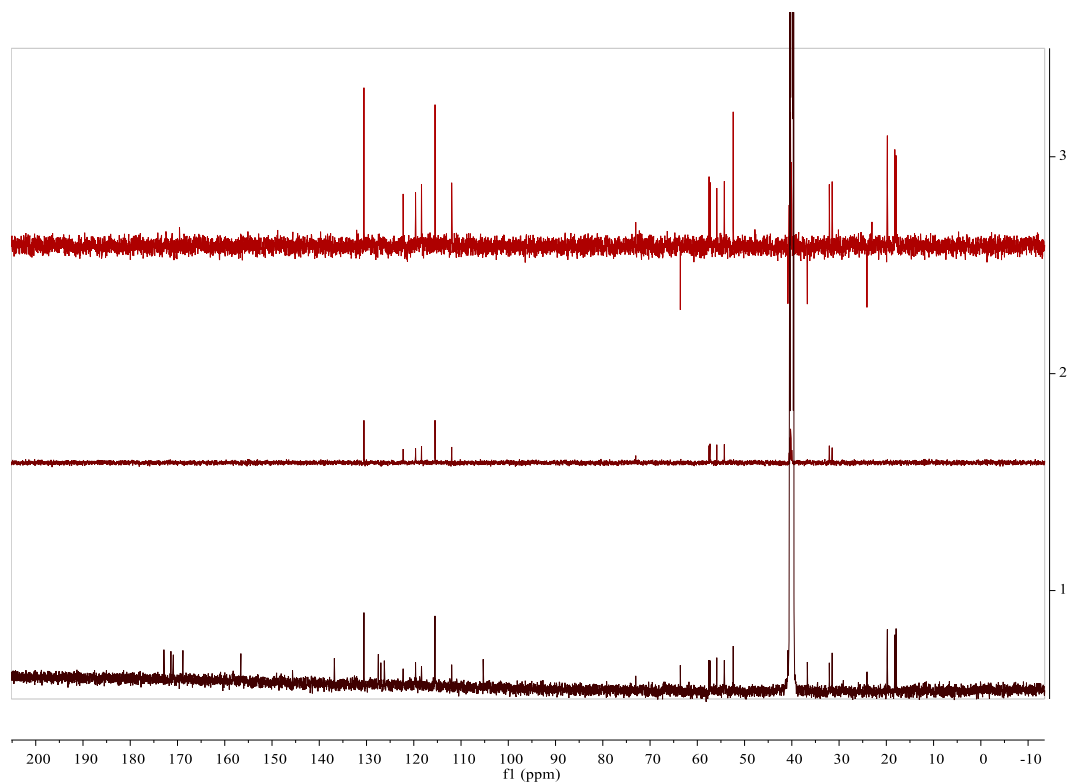

**Figure S51.** DEPT (150 MHz, DMSO-*d*<sub>6</sub>) spectrum of compound **6**

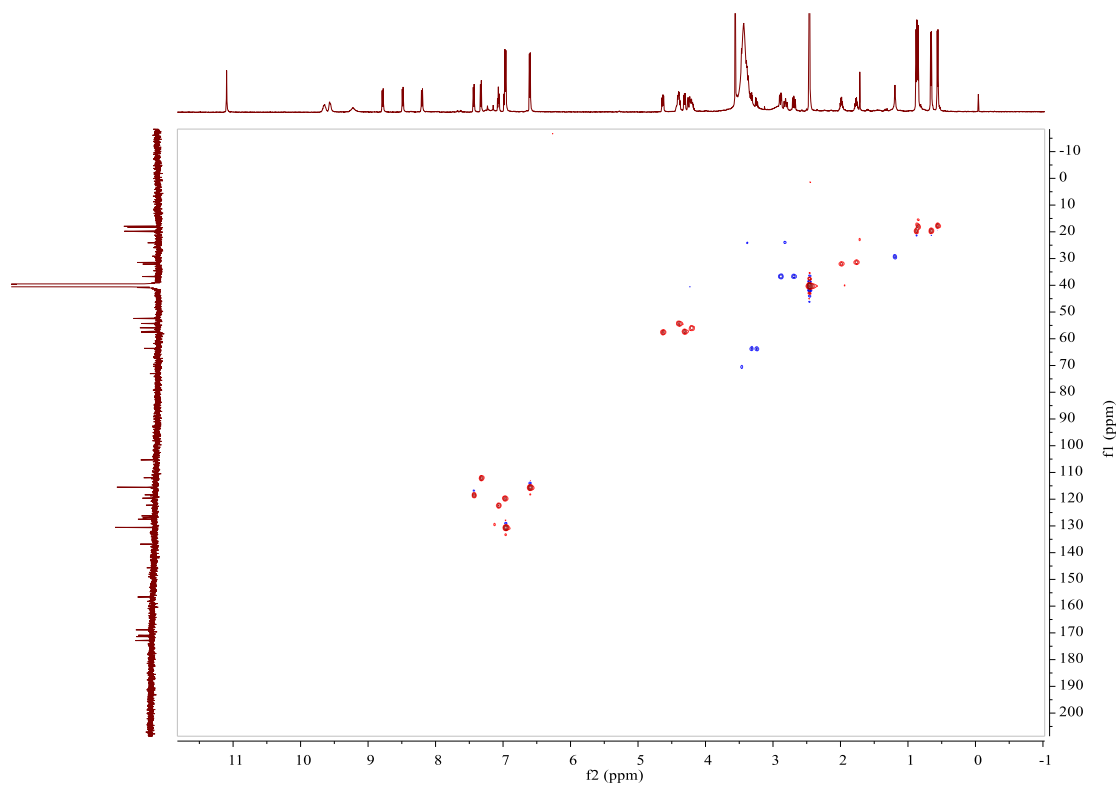

**Figure S52.** HSQC spectrum (600 MHz,  $\text{DMSO-}d_6$ ) of compound **6**

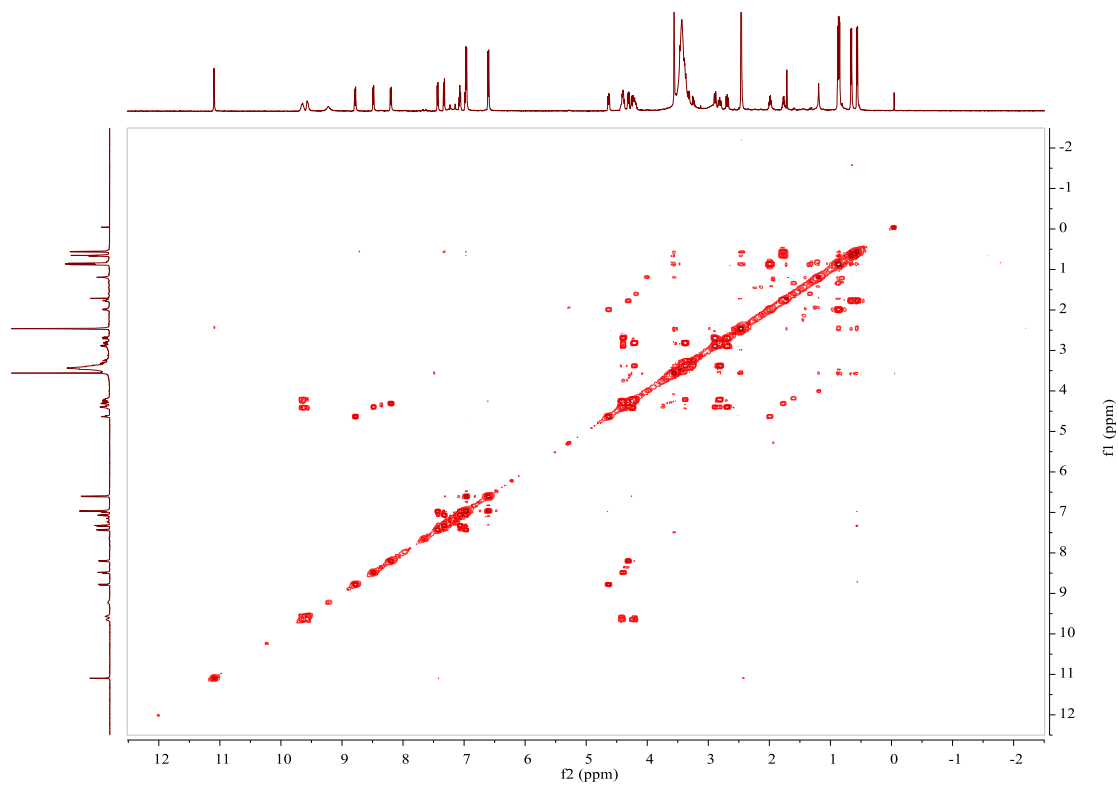

**Figure S53.**  $^1\text{H}$ - $^1\text{H}$  COSY spectrum (600 MHz,  $\text{DMSO-}d_6$ ) of compound **6**

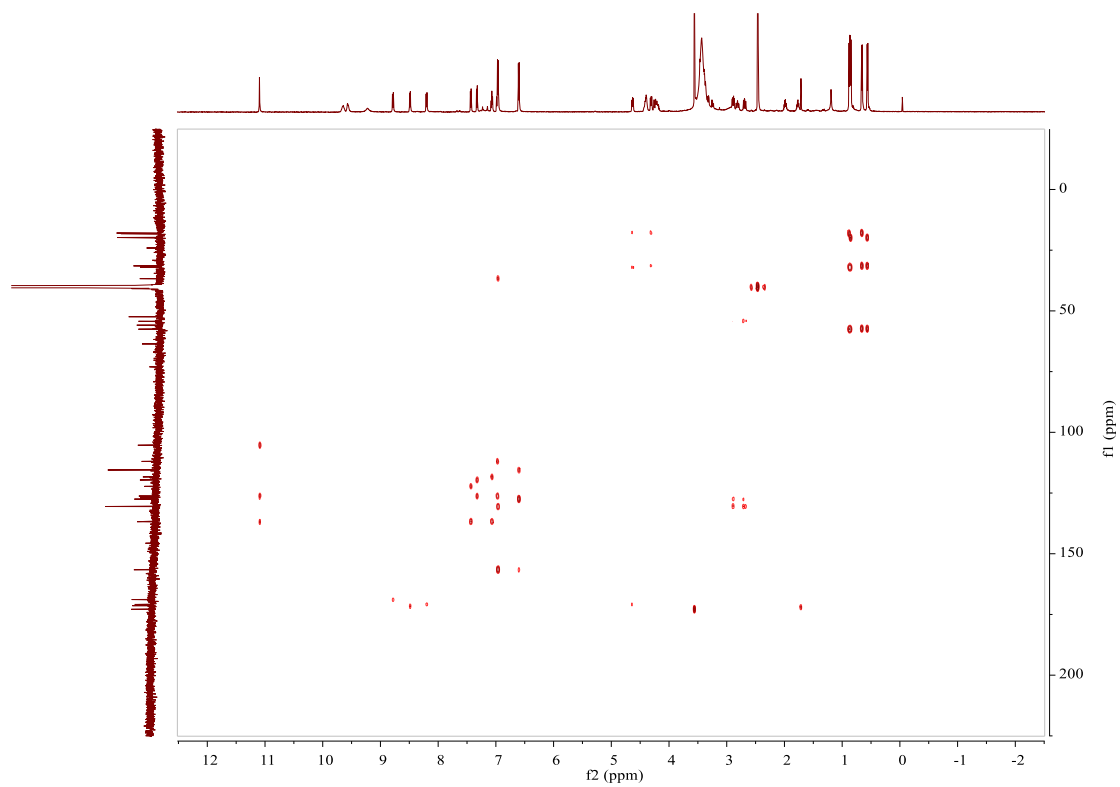

**Figure S54.** HMBC spectrum (600 MHz, DMSO- $d_6$ ) of compound **6**

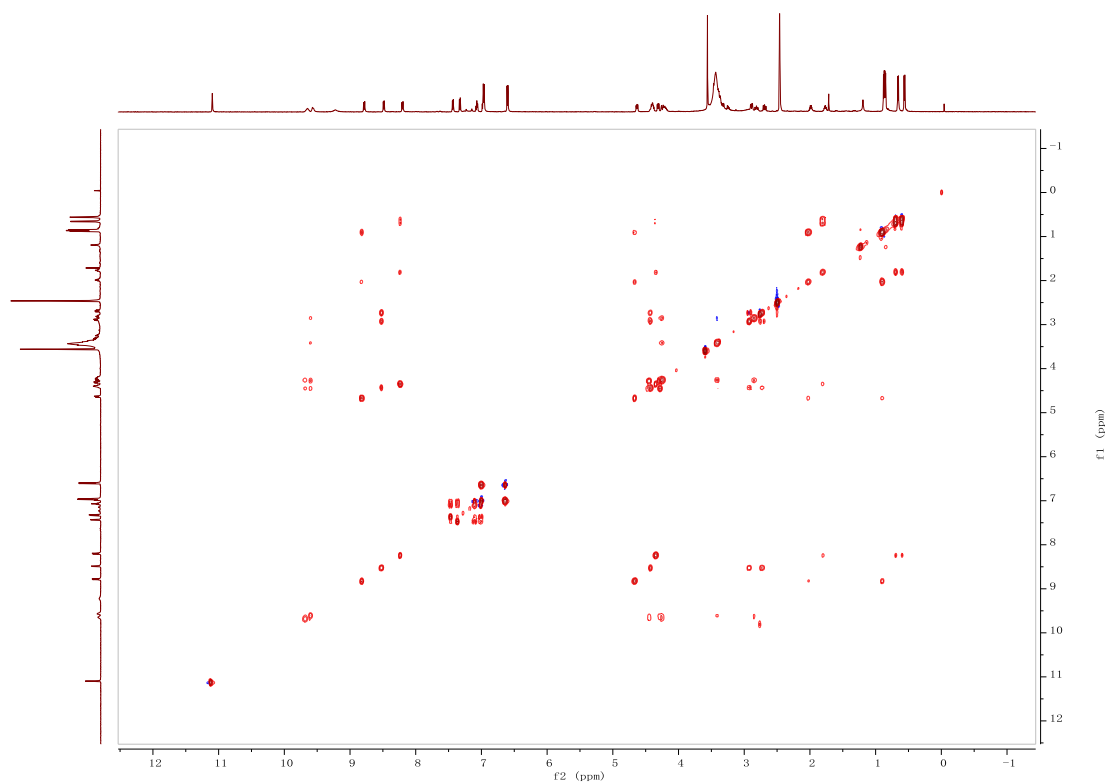

**Figure S55.** TOCSY spectrum (600 MHz, DMSO- $d_6$ ) of compound **6**

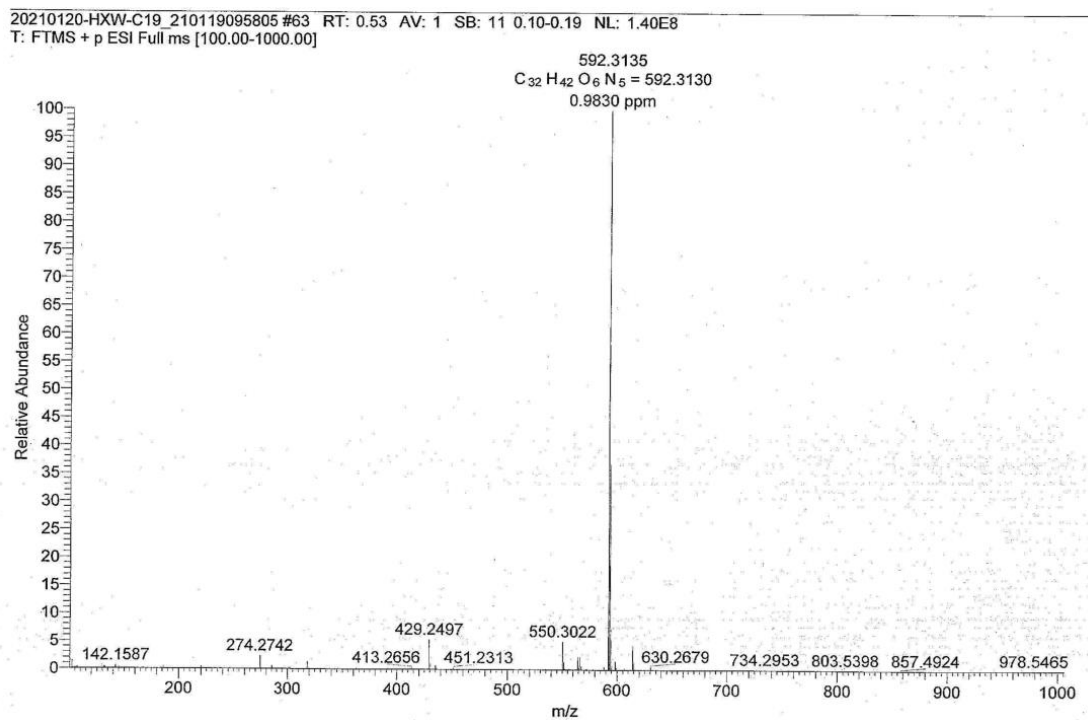

**Figure S56.** HRESIMS spectrum of compound **6**

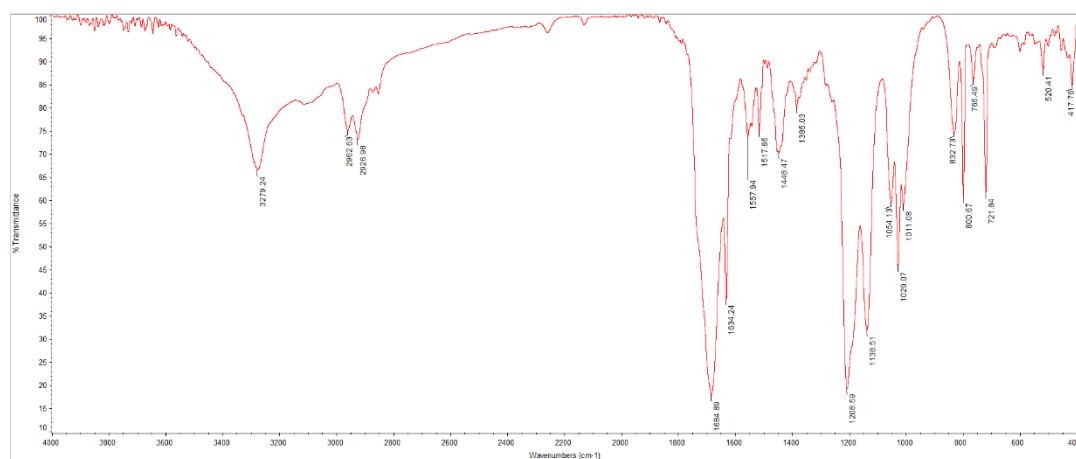

**Figure S57.** IR spectrum of compound **6**

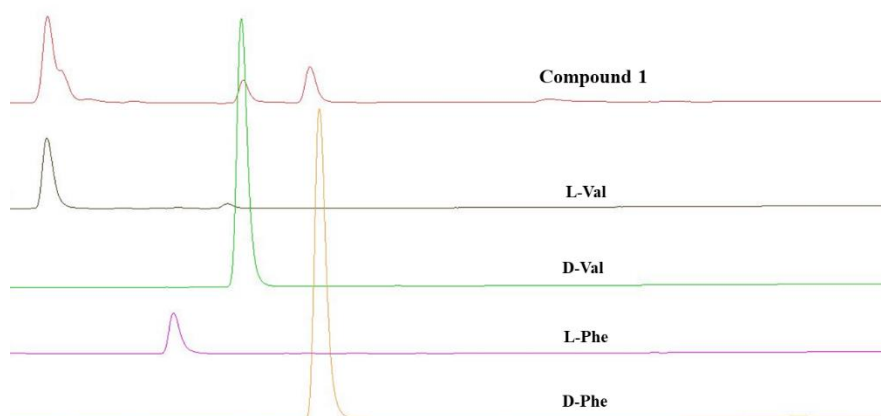

**Figure S58.** Advanced Marfey's acid hydrolytic analysis of compound **1**

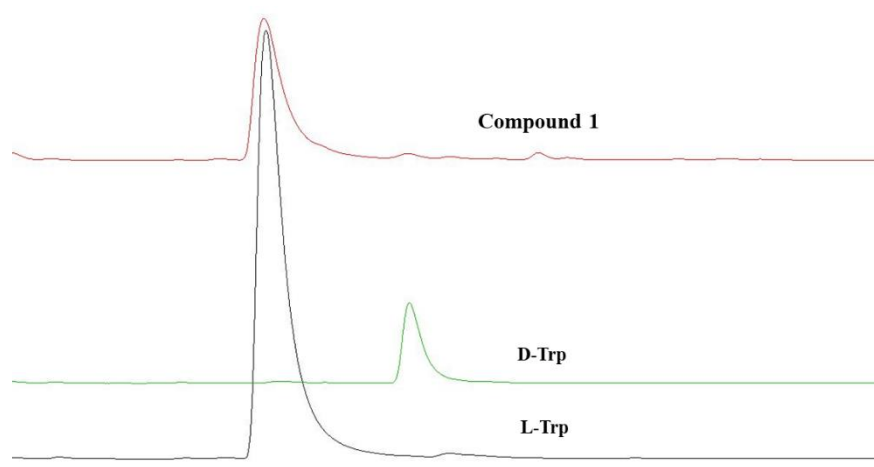

**Figure S59.** Advanced Marfey's alkaline hydrolytic analysis of compound **1**

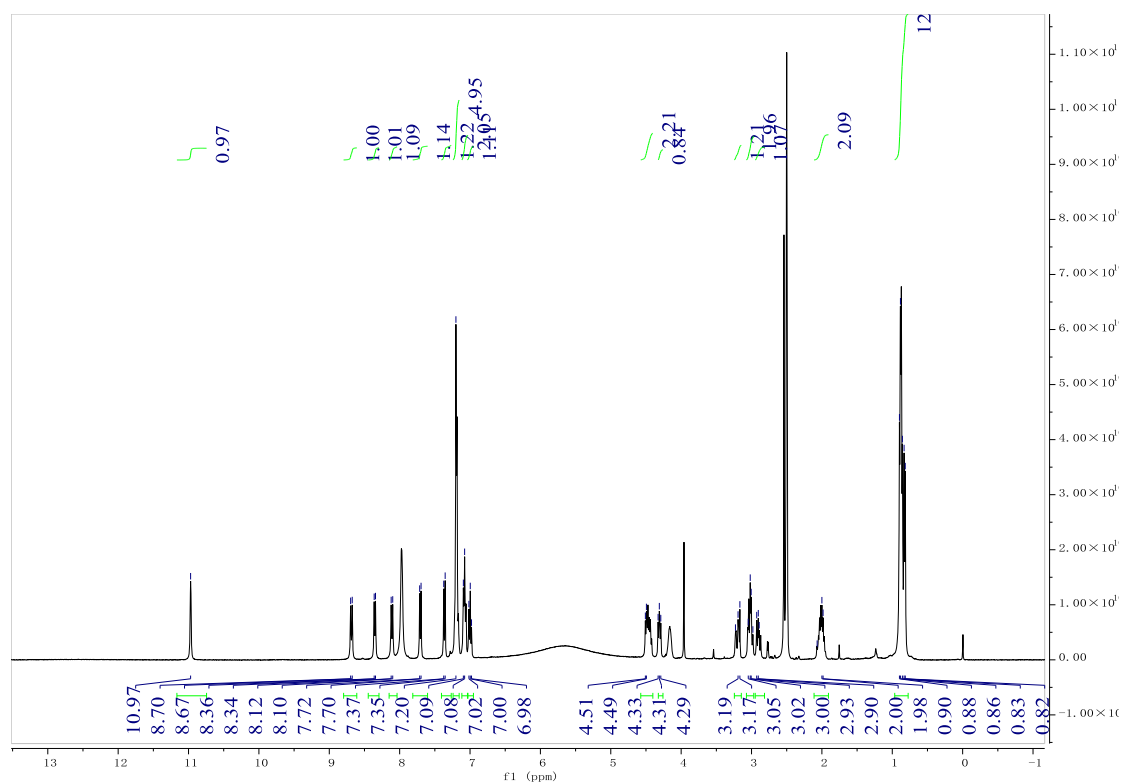

**Figure S60.**  $^1\text{H}$ -NMR spectrum of **1a** (400 MHz,  $\text{DMSO}-d_6$ )



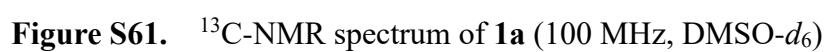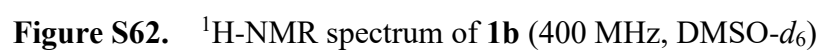

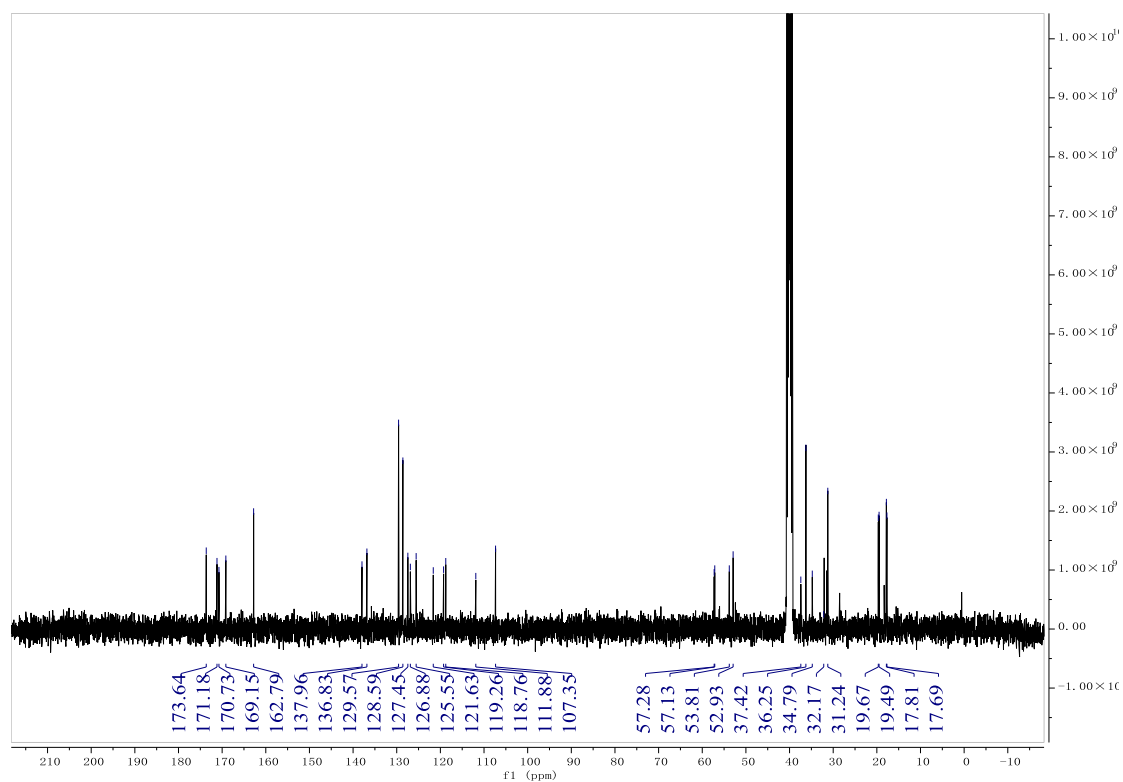

**Figure S63.**  $^{13}\text{C}$ -NMR spectrum of **1b** (100 MHz, DMSO- $d_6$ )

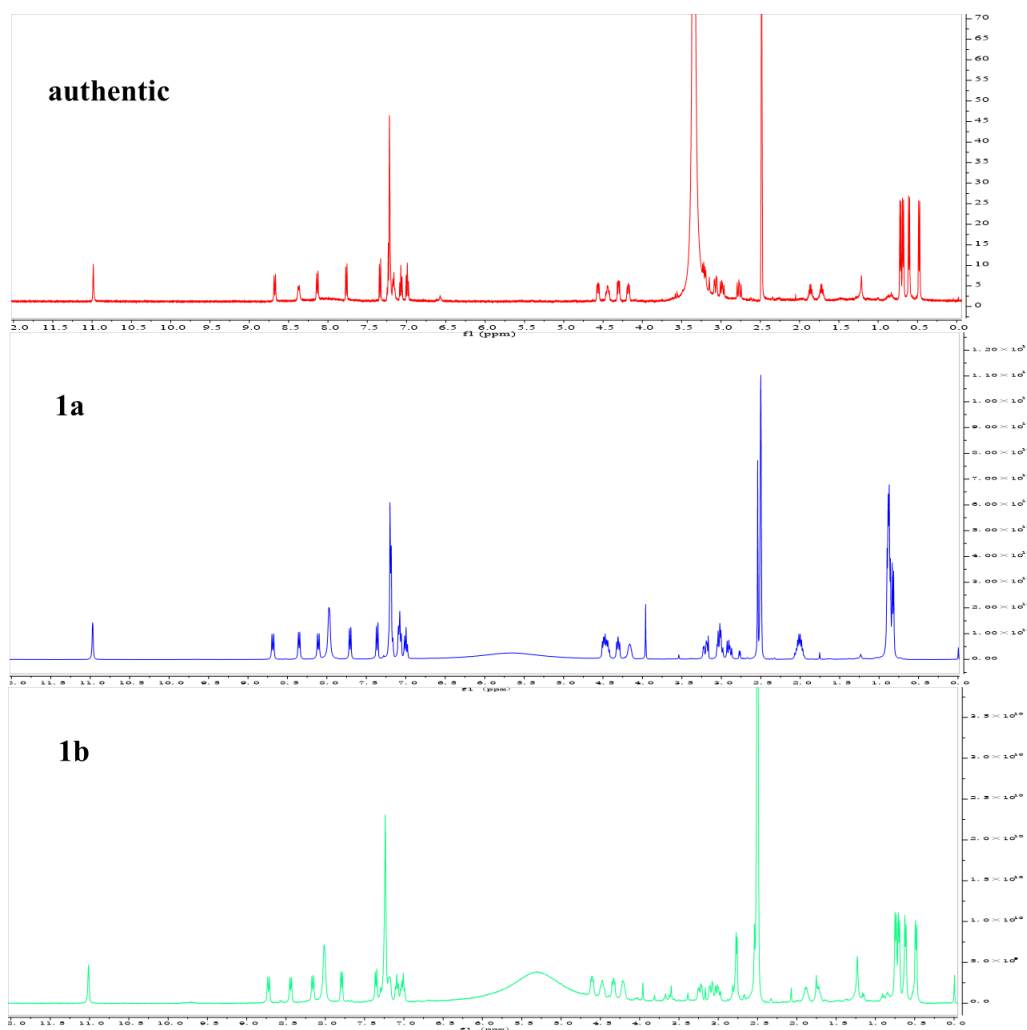

**Figure S64.** Comparison of  $^1\text{H}$ -NMR spectra of authentic **1**, **1a**, and **1b**

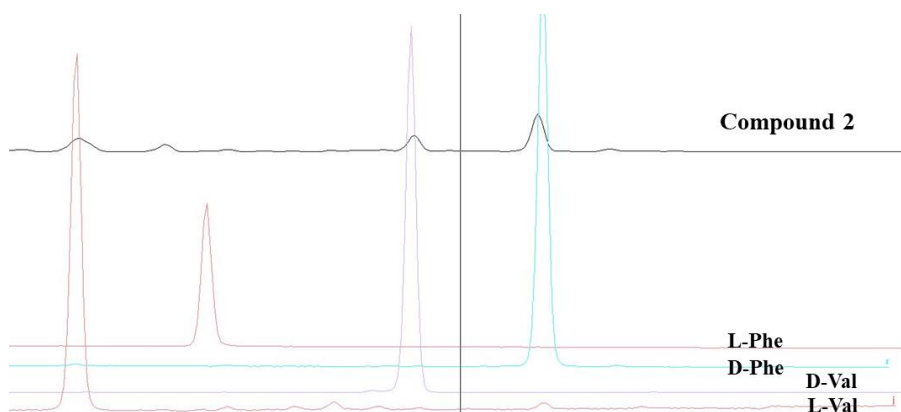

**Figure S65.** Advanced Marfey's acid hydrolytic analysis of compound **2**

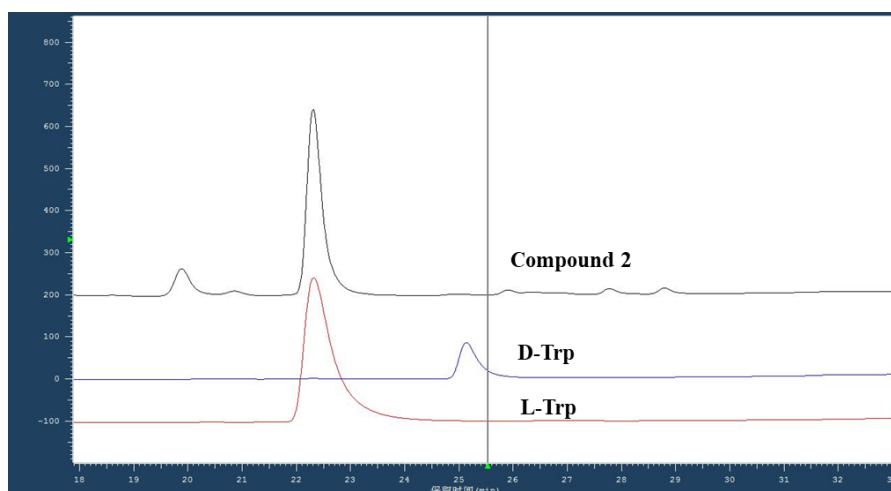

**Figure S66.** Advanced Marfey's alkaline hydrolytic analysis of compound **2**

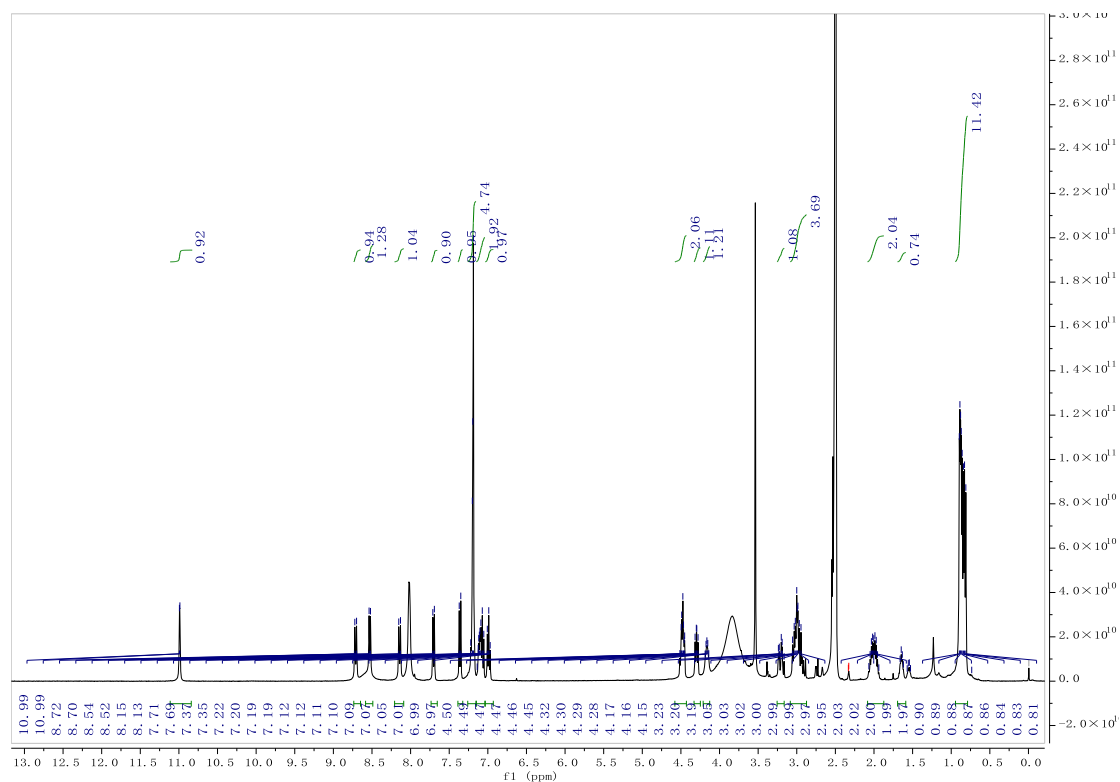

**Figure S67.**  $^1\text{H}$ -NMR spectrum of **2a** (400 MHz,  $\text{DMSO}-d_6$ )

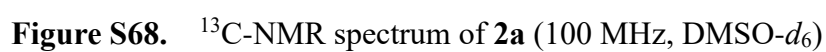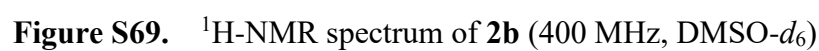

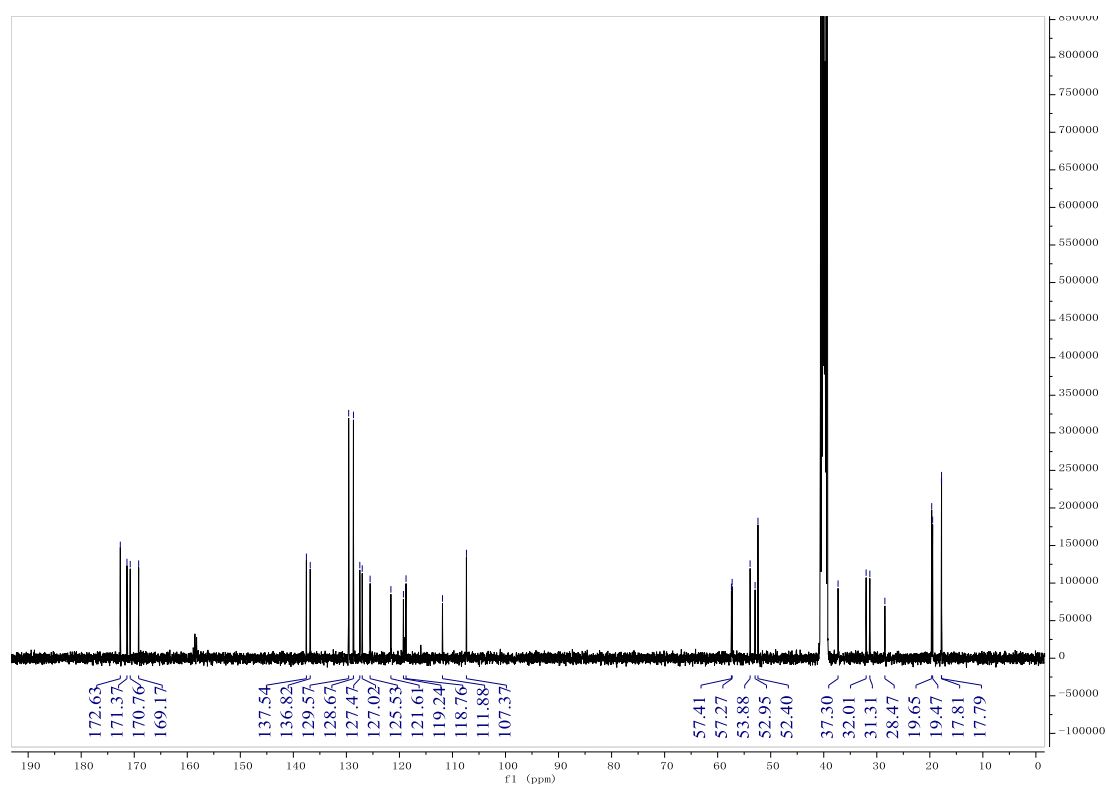

**Figure S70.**  $^{13}\text{C}$ -NMR spectrum of **2b** (100 MHz, DMSO- $d_6$ )

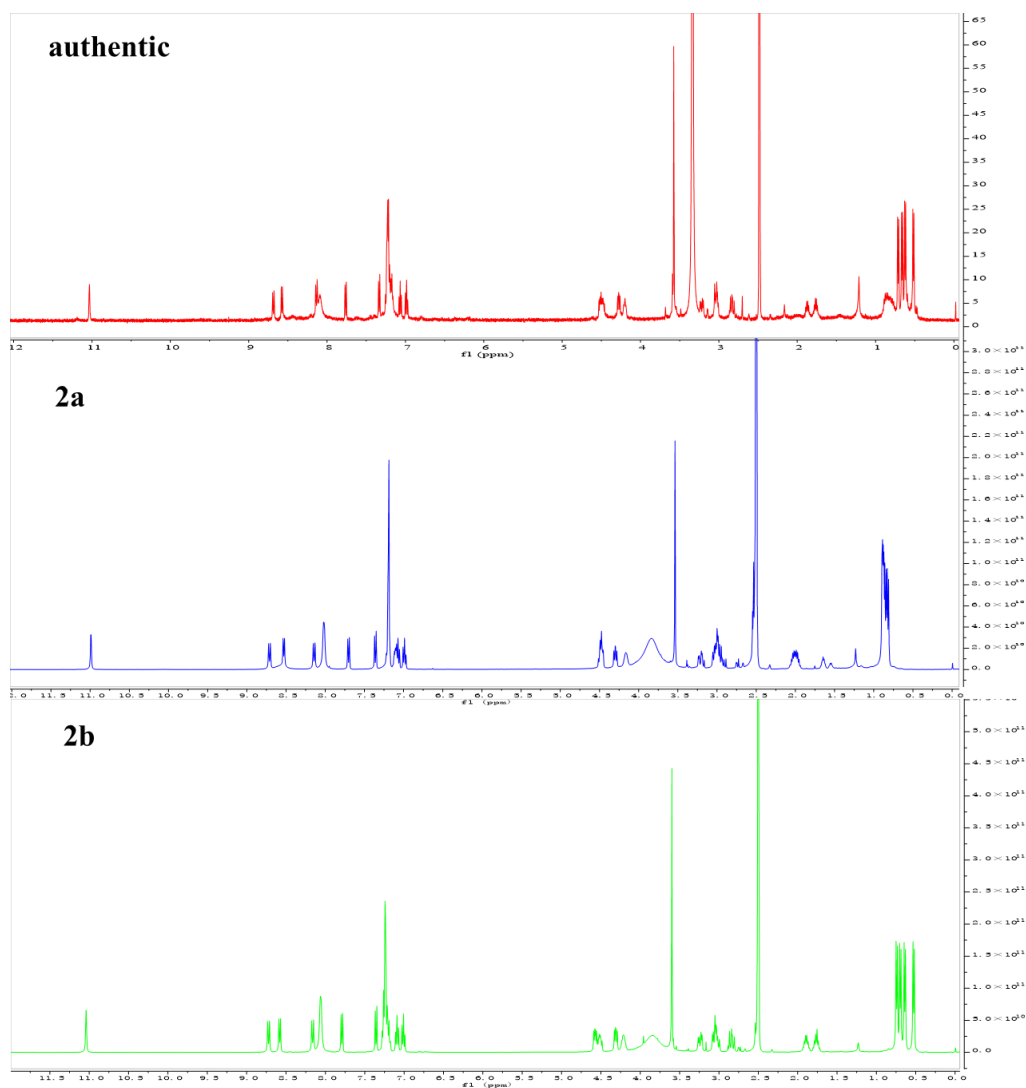

**Figure S71.** Comparison of  $^1\text{H}$ -NMR spectra of authentic **2**, **2a**, and **2b**

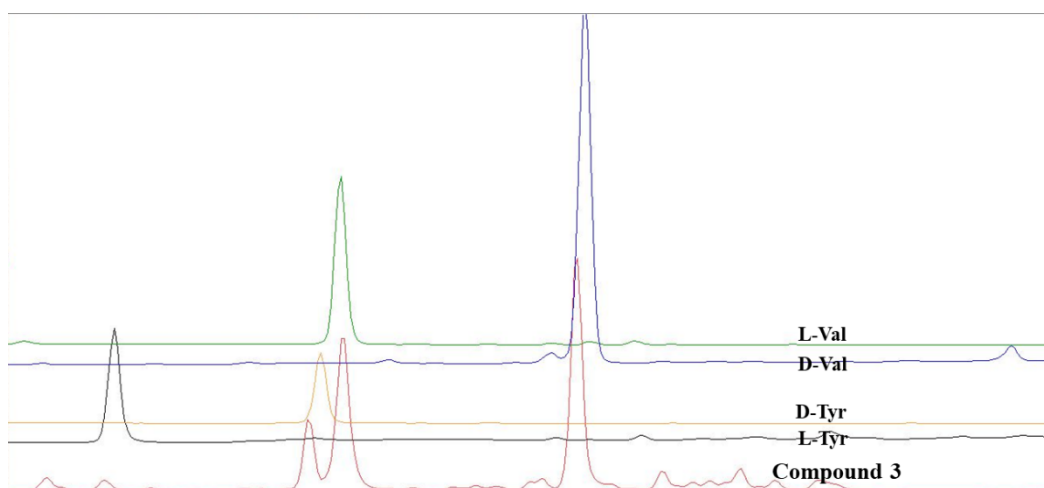

**Figure S72.** Advanced Marfey's acid hydrolytic analysis of compound **3**

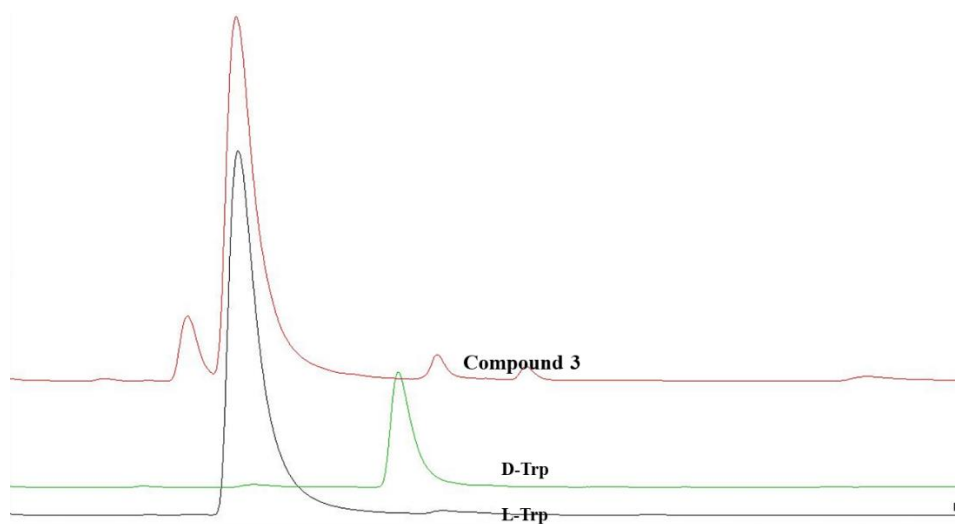

**Figure S73.** Advanced Marfey's alkaline hydrolytic analysis of compound **3**

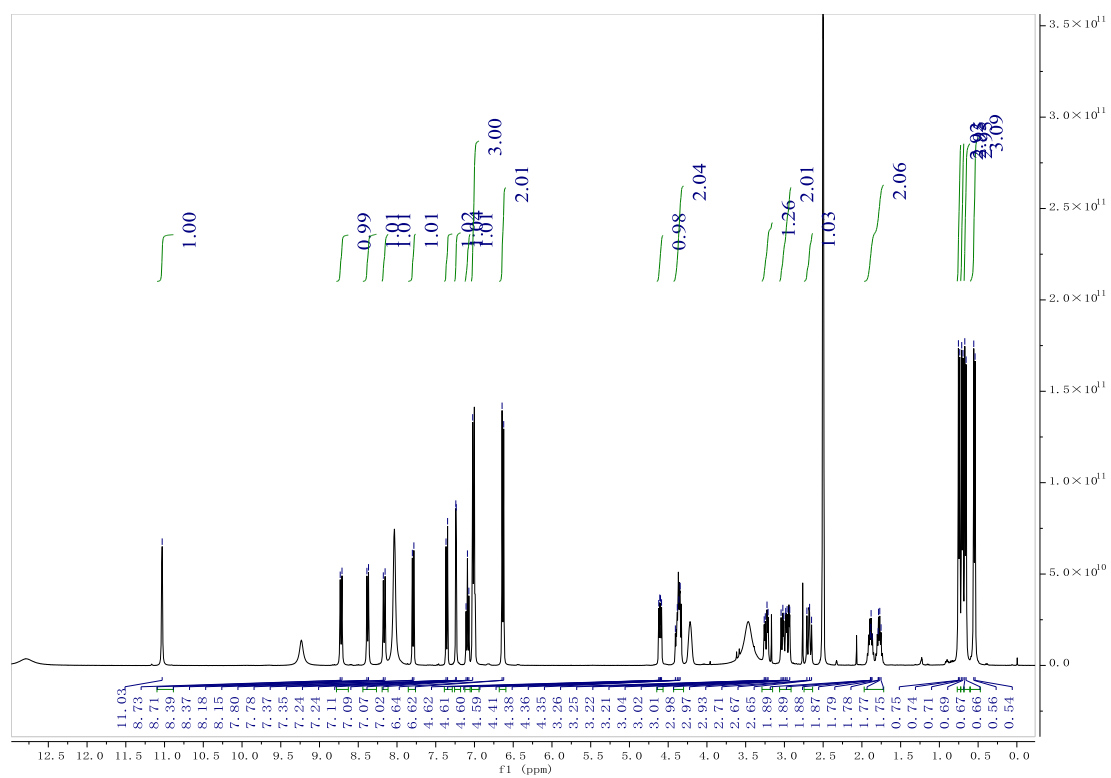

**Figure S74.**  $^1\text{H}$ -NMR spectrum of synthetic **3** (400 MHz,  $\text{DMSO-}d_6$ )



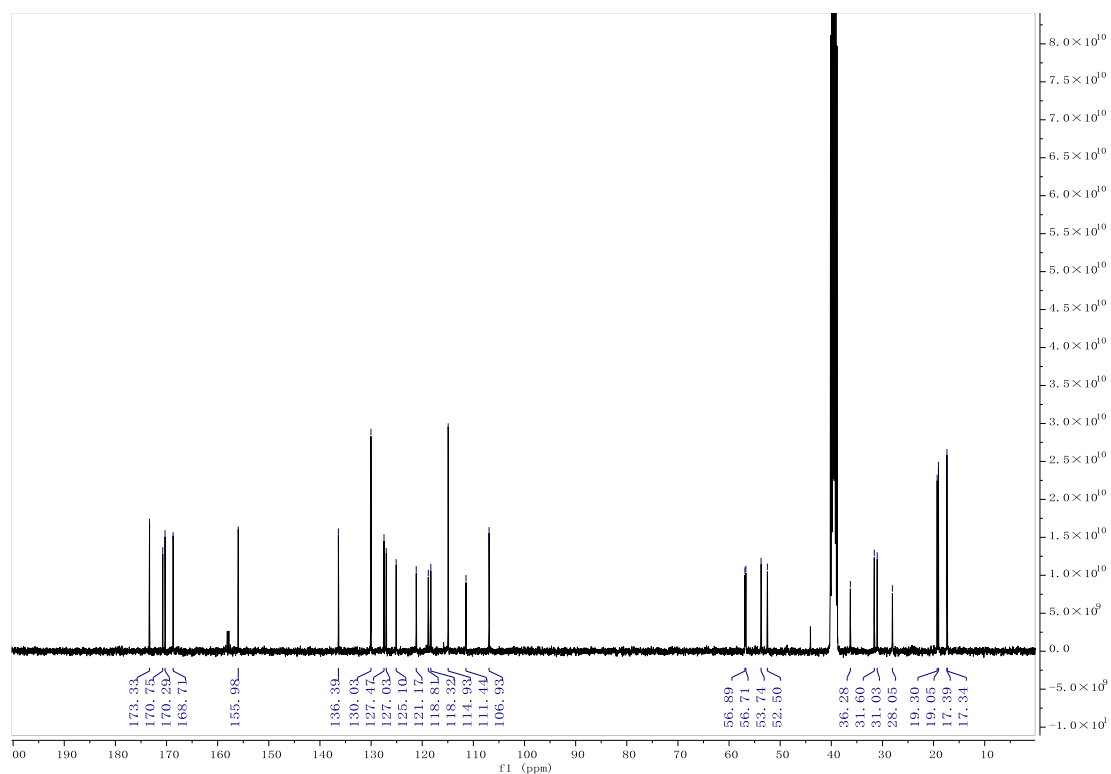

**Figure S75.** <sup>13</sup>C-NMR spectrum of synthetic **3** (100 MHz, DMSO-*d*<sub>6</sub>)

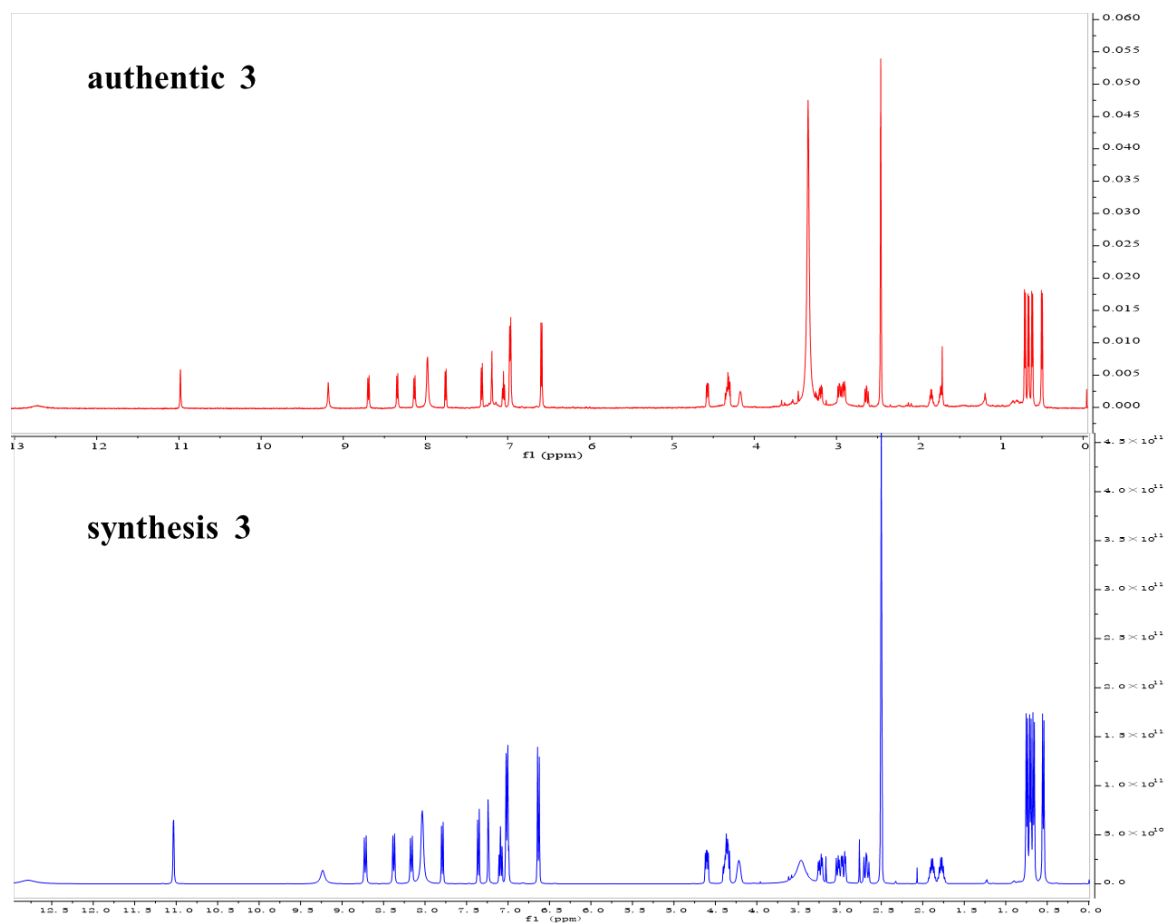

**Figure S76.** Comparison of <sup>1</sup>H-NMR spectra of **3** with synthetic **3**

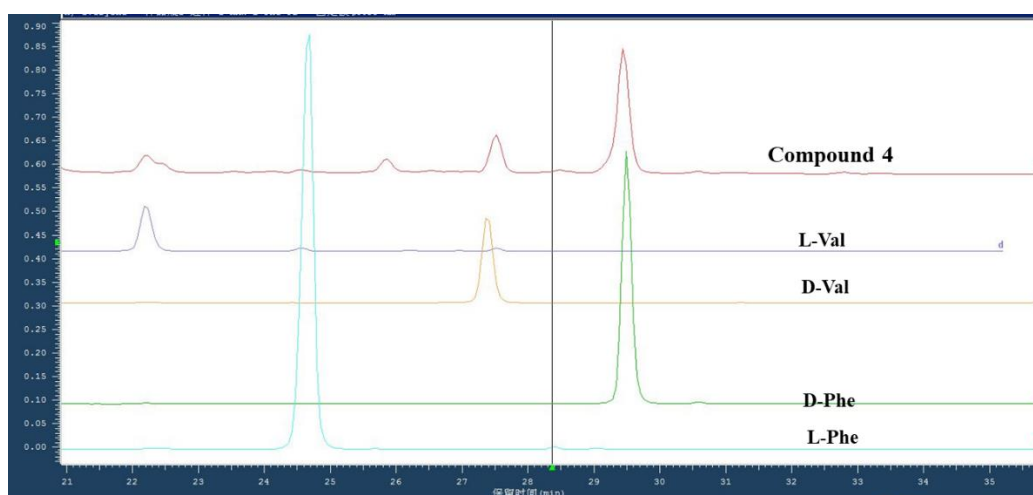

**Figure S77.** Advanced Marfey's acid hydrolytic analysis of compound **4**

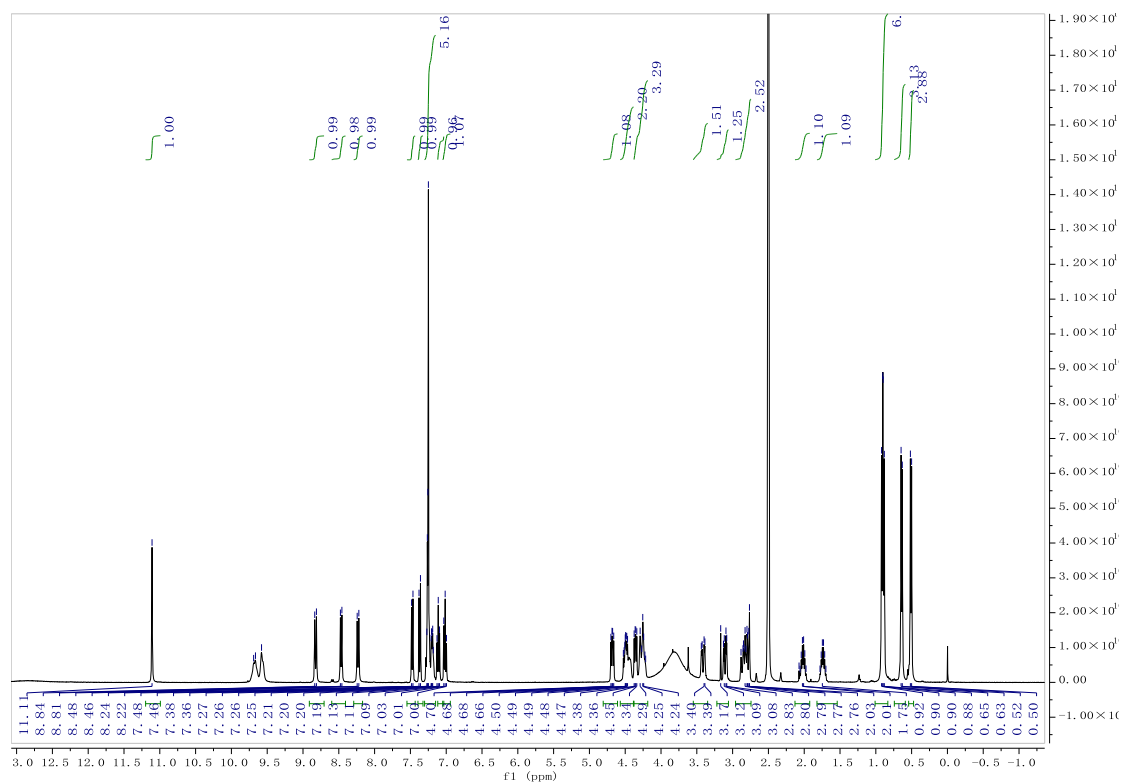

**Figure S78.**  $^1\text{H}$ -NMR spectrum of synthetic **4** (400 MHz,  $\text{DMSO}-d_6$ )

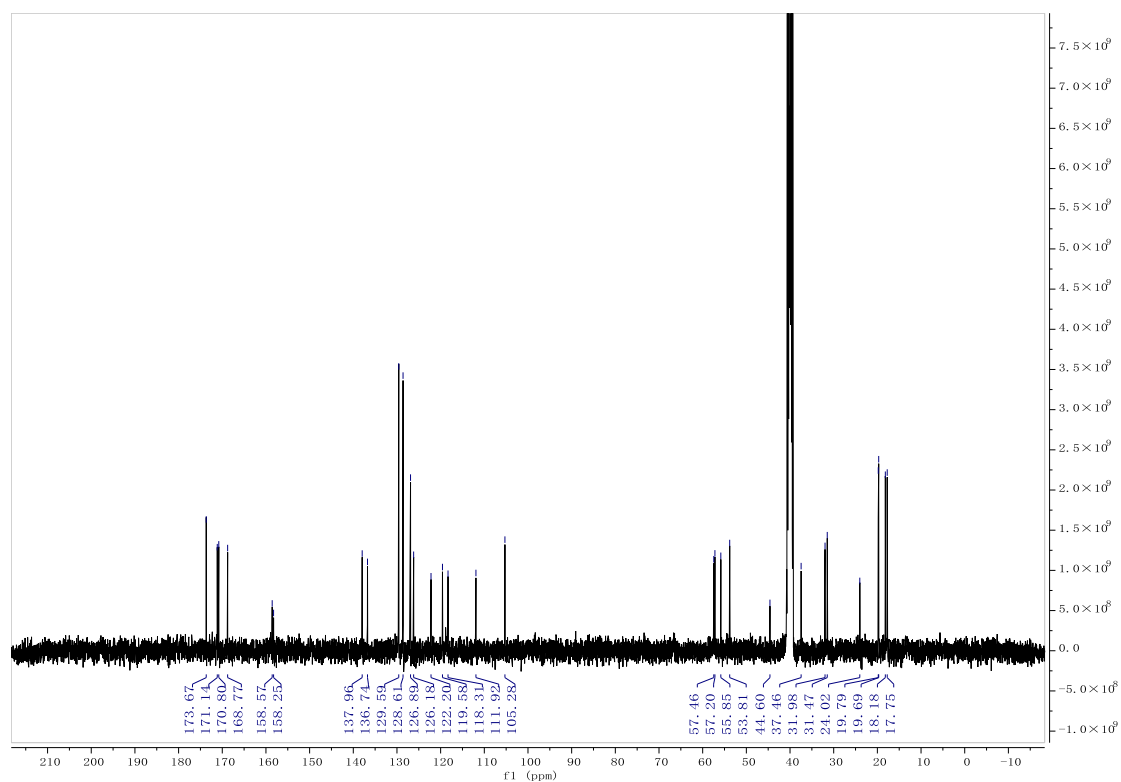

**Figure S79.**  $^{13}\text{C}$ -NMR spectrum of synthetic **4** (100 MHz,  $\text{DMSO}-d_6$ )

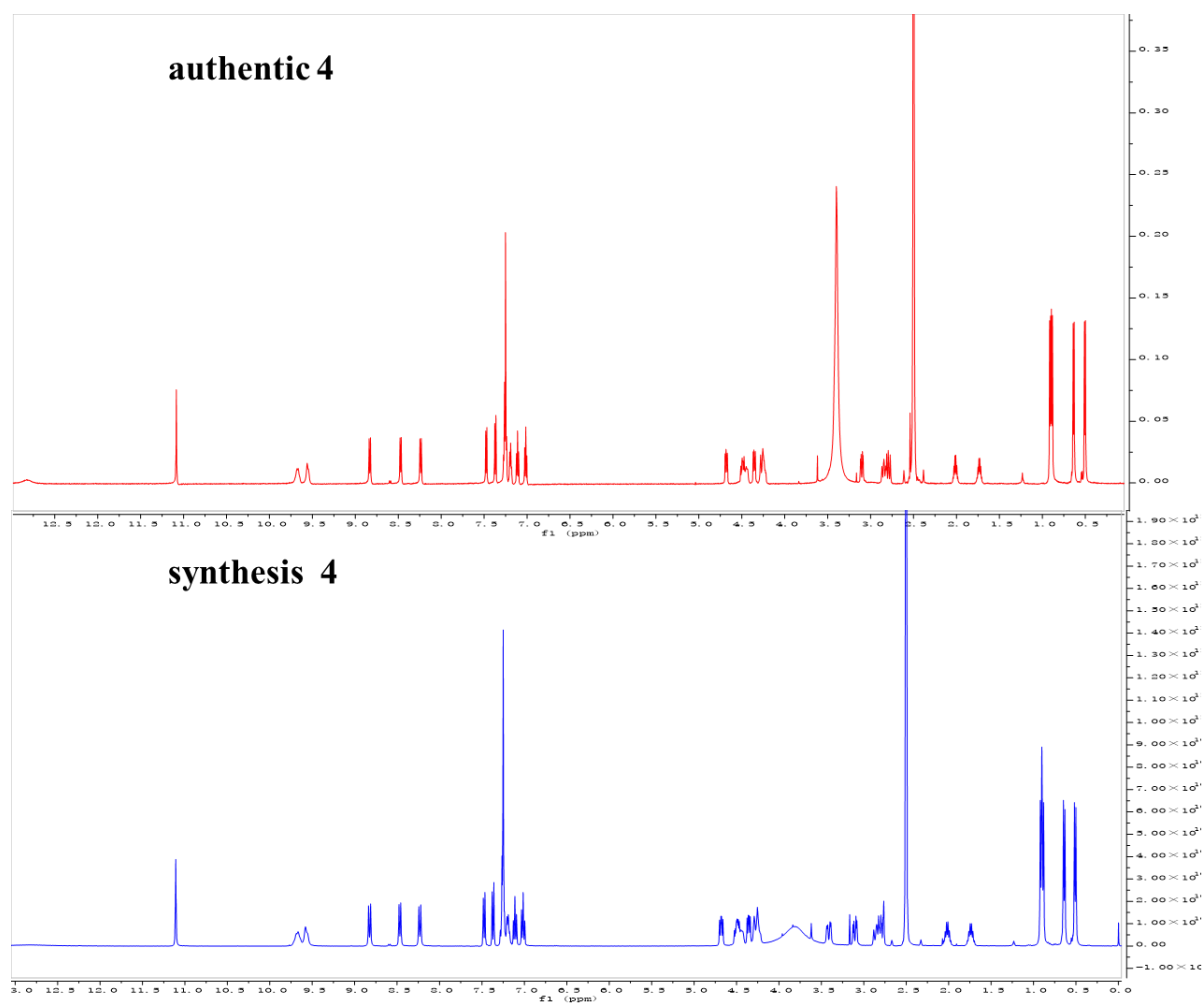

**Figure S80.** Comparison of <sup>1</sup>H-NMR spectra of **4**, with synthetic **4**

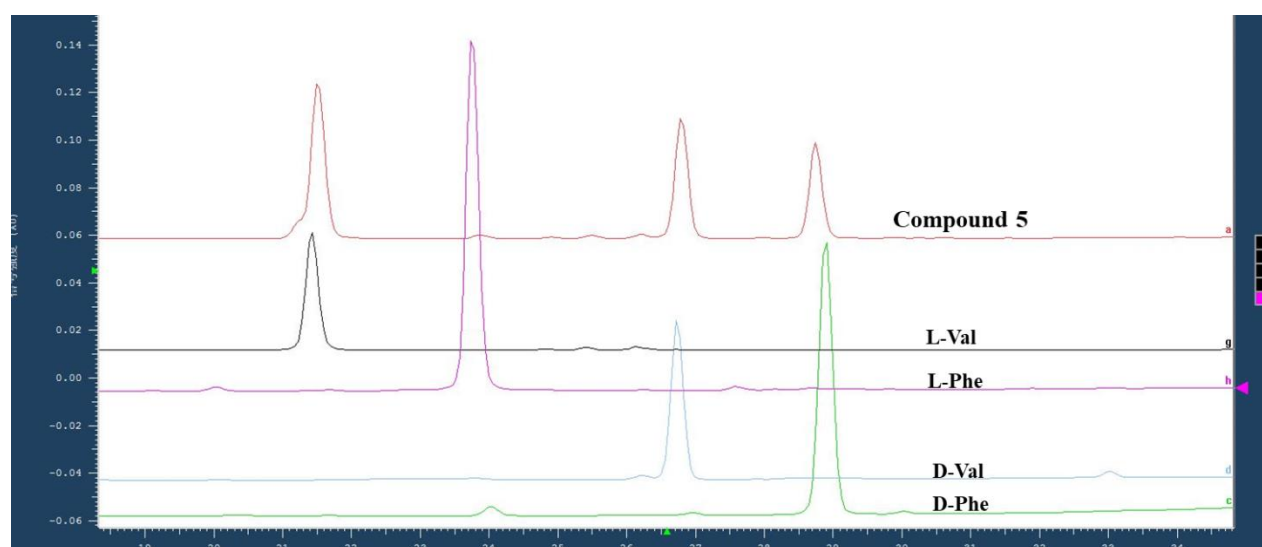

**Figure S81.** Advanced Marfey's acid hydrolytic analysis of compound **5**

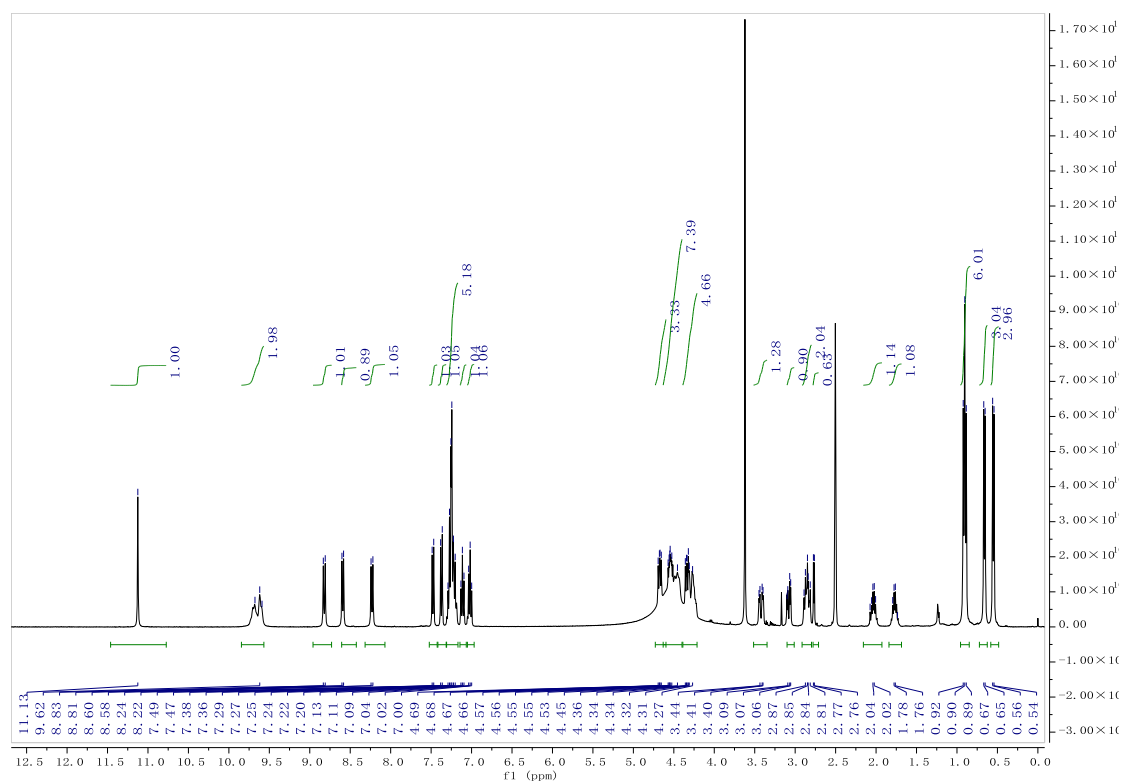

**Figure S82.** <sup>1</sup>H-NMR spectrum of synthetic **5** (400 MHz, DMSO-*d*<sub>6</sub>)

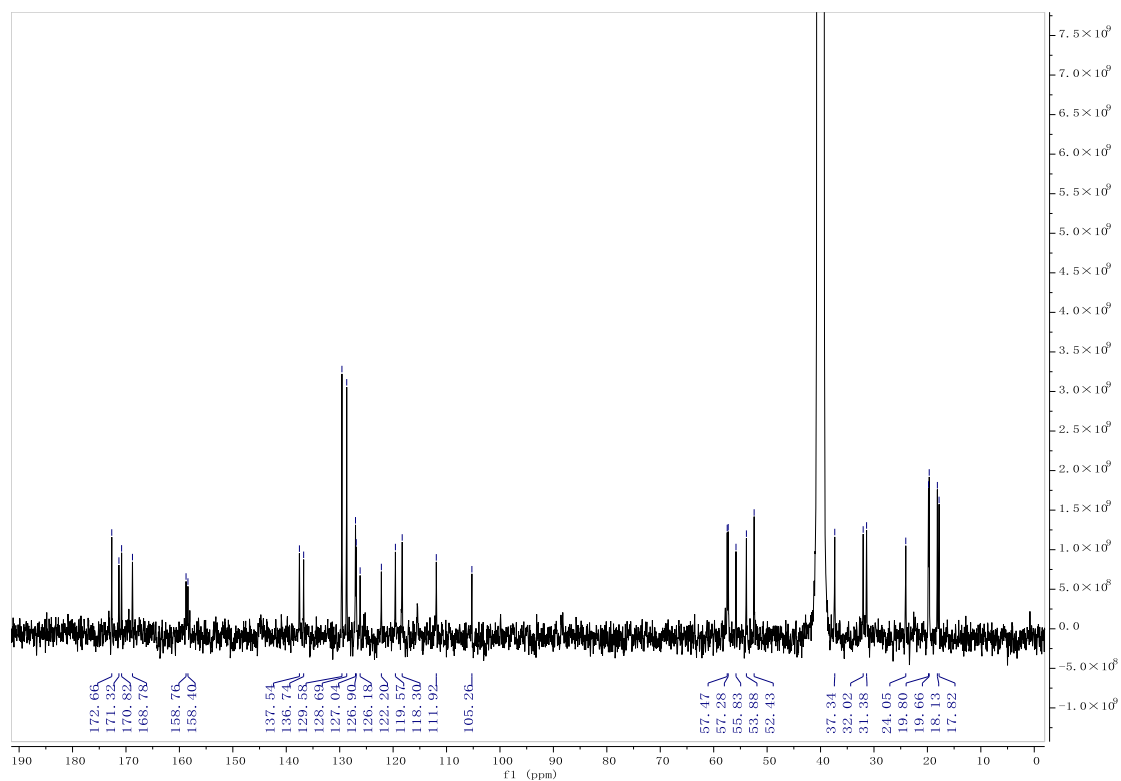

**Figure S83.** <sup>13</sup>C-NMR spectrum of synthetic **5** (100 MHz, DMSO-*d*<sub>6</sub>)

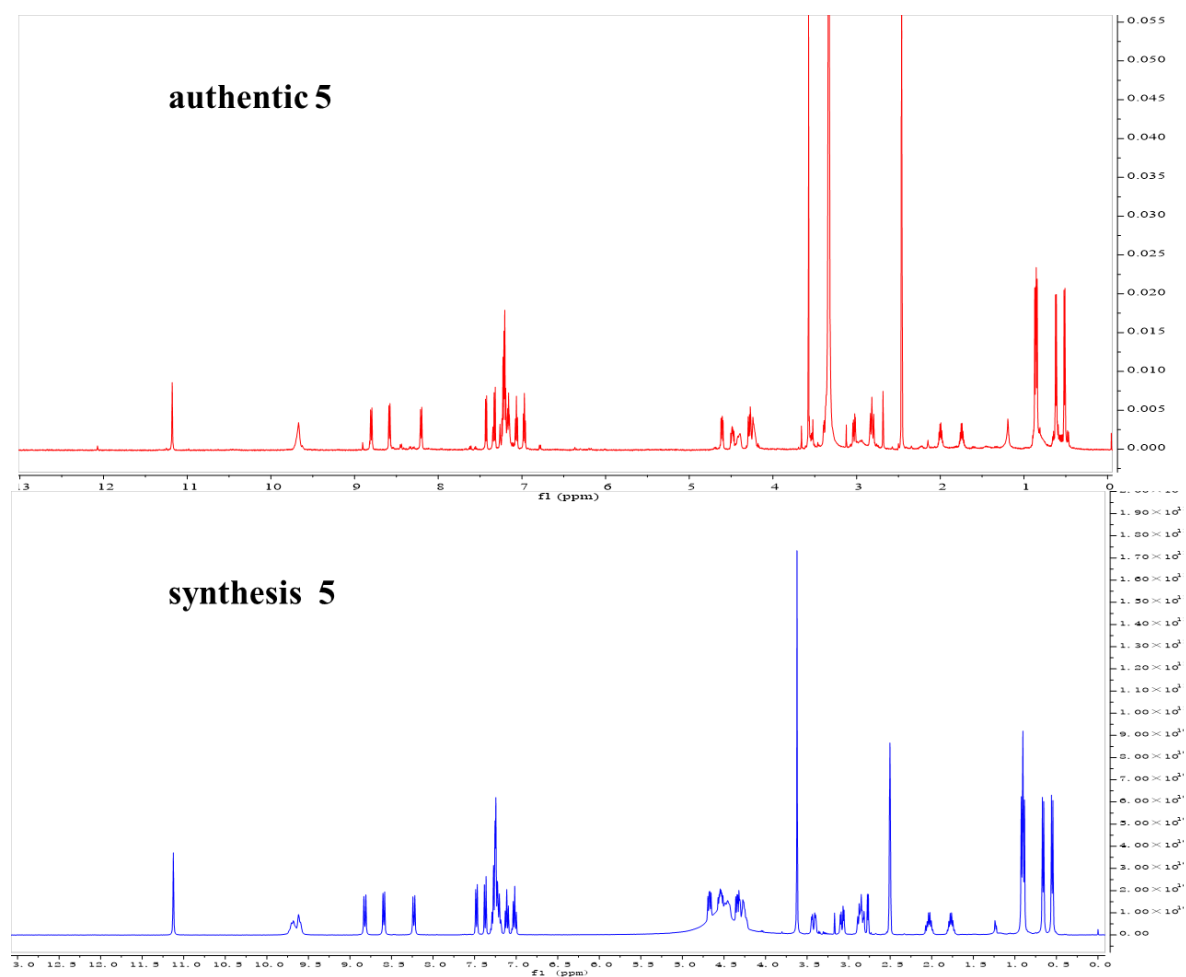

**Figure S84.** Comparison of <sup>1</sup>H-NMR spectra of **5** with synthetic **5**

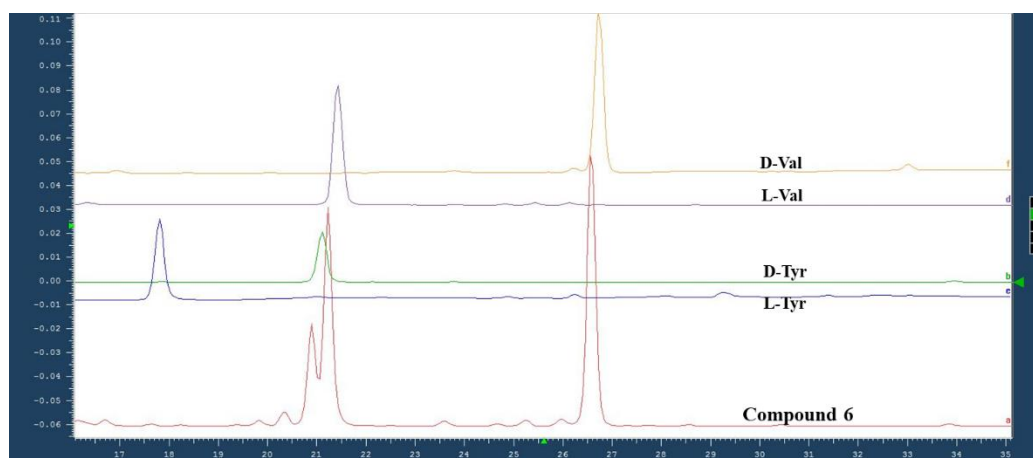

**Figure S85.** Advanced Marfey's acid hydrolytic analysis of compound **6**

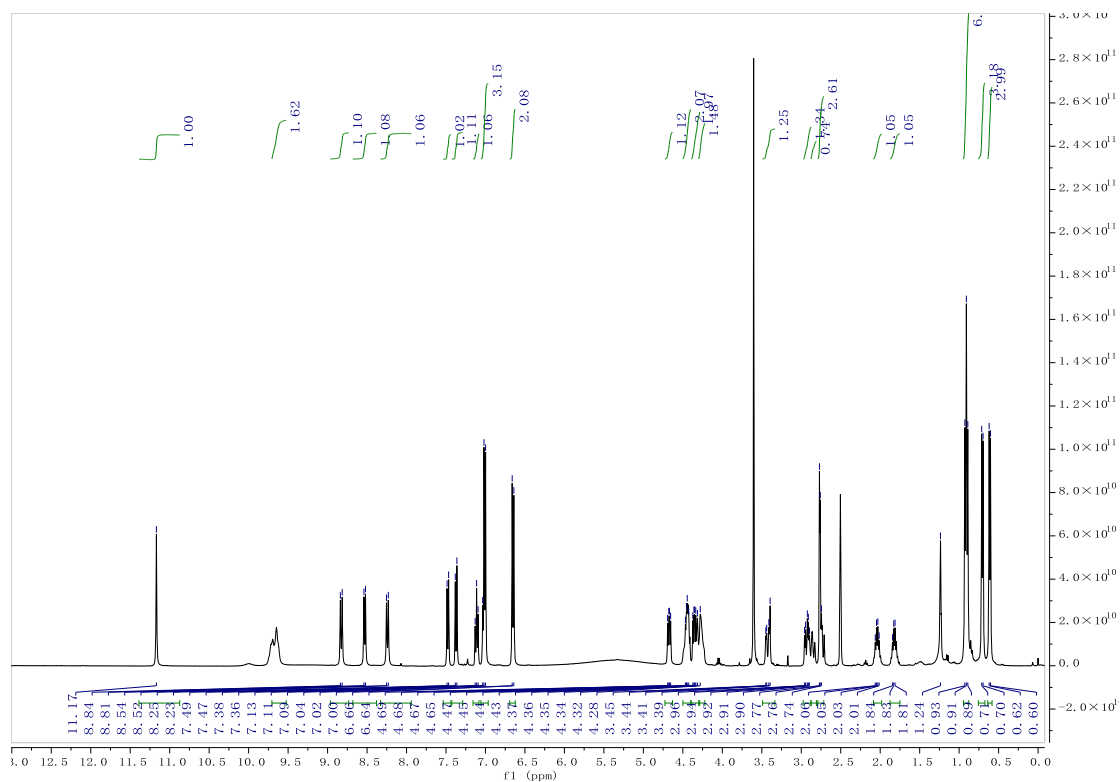

**Figure S86.**  $^1\text{H}$ -NMR spectrum of synthetic **6** (400 MHz,  $\text{DMSO}-d_6$ )

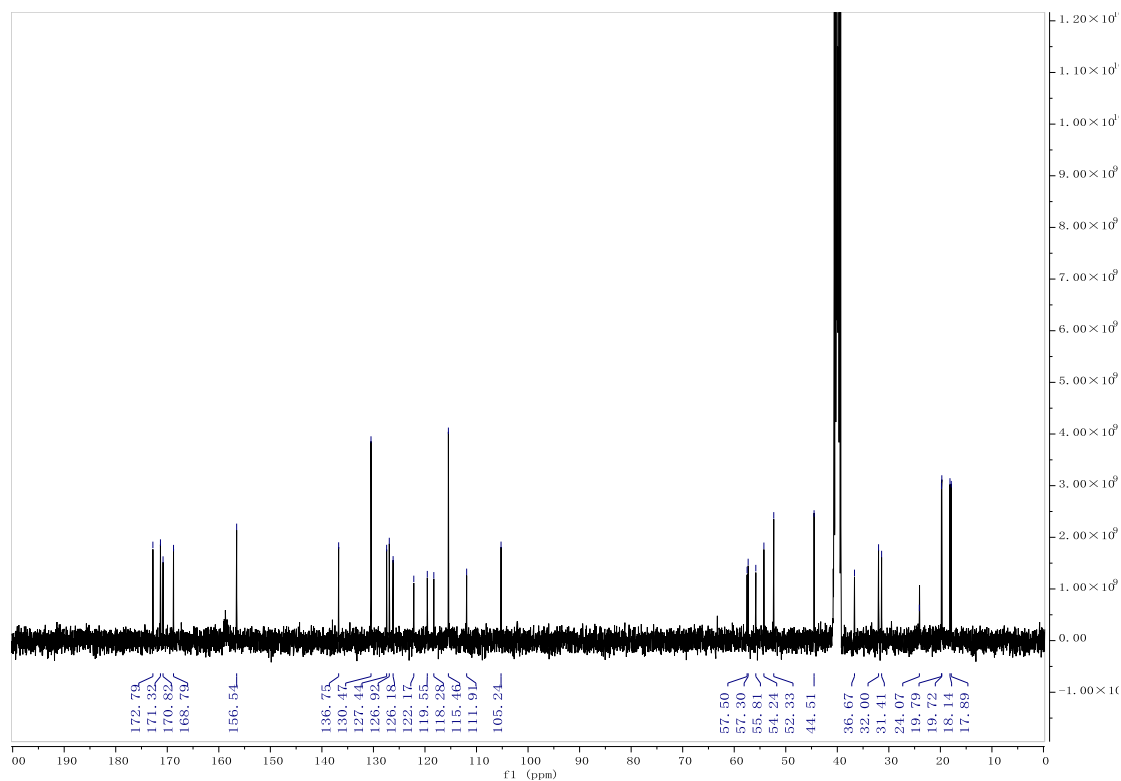

**Figure S87.**  $^{13}\text{C}$ -NMR spectrum of synthetic **6** (100 MHz,  $\text{DMSO}-d_6$ )

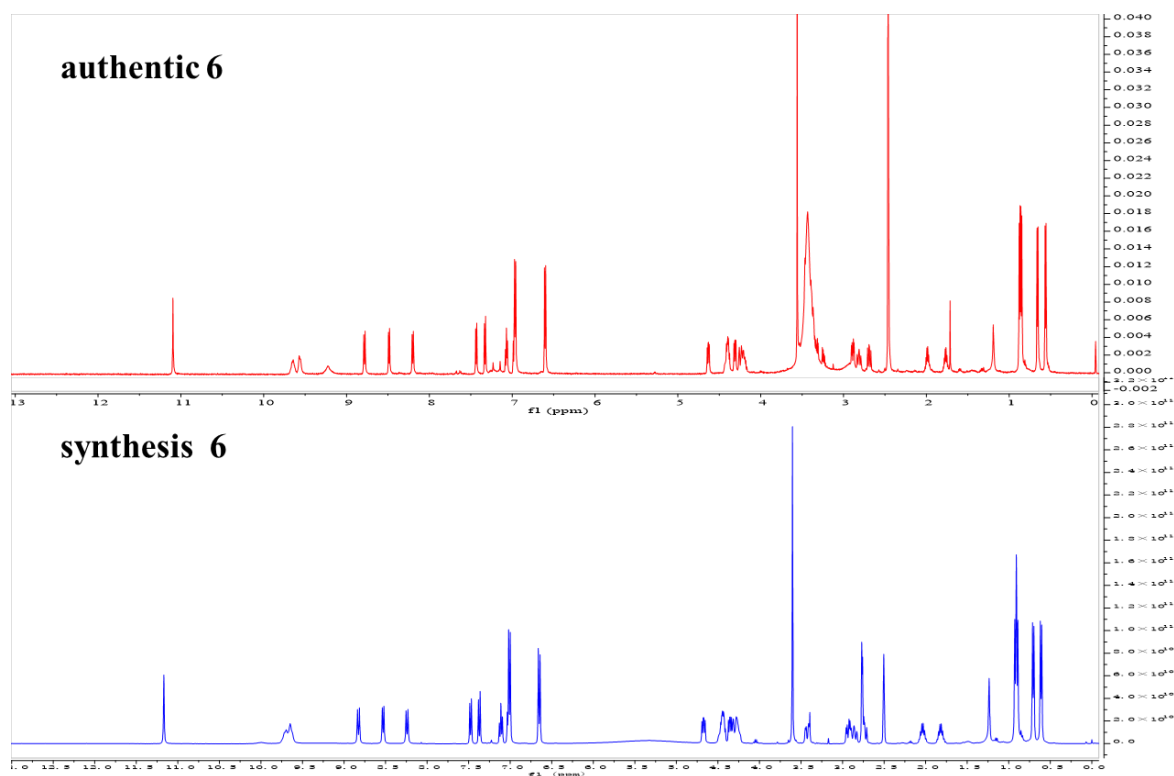

**Figure S88.** Comparison of  $^1\text{H}$ -NMR spectra of **6** with synthetic **6**

**Table S1.** Table of compounds (**1-6**) ( $100\ \mu\text{M}$ ) inhibition of ACh-evoked peak current amplitude mediated by human (h)  $\alpha 1\beta 1\epsilon\delta$ ,  $\alpha 1\beta 1\gamma\delta$ ,  $\alpha 3\beta 2$ ,  $\alpha 3\beta 4$ ,  $\alpha 4\beta 2$ ,  $\alpha 7$  and  $\alpha 9\alpha 10$  nAChRs. Whole-cell currents at h $\alpha 1\beta 1\epsilon\delta$  and h $\alpha 1\beta 1\gamma\delta$  were activated by  $5\ \mu\text{M}$  ACh, h $\alpha 3\beta 2$  and h $\alpha 9\alpha 10$  were activated by  $6\ \mu\text{M}$  ACh, and h $\alpha 3\beta 4$ , h $\alpha 4\beta 2$ , and h $\alpha 7$  were activated by 300, 3, and  $100\ \mu\text{M}$  ACh, respectively (mean  $\pm$  SD,  $n = 6 - 11$ ).

| Compounds | Relative current amplitude          |                                   |                       |                       |                       |                   |                         |
|-----------|-------------------------------------|-----------------------------------|-----------------------|-----------------------|-----------------------|-------------------|-------------------------|
|           | (h) $\alpha 1\beta 1\epsilon\delta$ | (h) $\alpha 1\beta 1\gamma\delta$ | (h) $\alpha 3\beta 2$ | (h) $\alpha 3\beta 4$ | (h) $\alpha 4\beta 2$ | (h) $\alpha 7$    | (h) $\alpha 9\alpha 10$ |
| <b>1</b>  | $0.190 \pm 0.056$                   | $0.664 \pm 0.062$                 | $0.435 \pm 0.071$     | $0.462 \pm 0.069$     | $0.637 \pm 0.053$     | $0.293 \pm 0.074$ | $0.103 \pm 0.027$       |
| <b>2</b>  | $0.024 \pm 0.011$                   | $0.017 \pm 0.014$                 | $0.236 \pm 0.069$     | $0.071 \pm 0.028$     | $0.301 \pm 0.039$     | $0.566 \pm 0.072$ | $0.075 \pm 0.036$       |
| <b>3</b>  | $0.648 \pm 0.067$                   | $0.861 \pm 0.084$                 | $0.451 \pm 0.056$     | $0.675 \pm 0.040$     | $0.793 \pm 0.078$     | $0.368 \pm 0.088$ | $0.509 \pm 0.041$       |
| <b>4</b>  | $0.757 \pm 0.065$                   | $0.985 \pm 0.019$                 | $0.924 \pm 0.069$     | $0.670 \pm 0.049$     | $0.972 \pm 0.057$     | $0.228 \pm 0.049$ | $0.824 \pm 0.064$       |
| <b>5</b>  | $0.392 \pm 0.069$                   | $0.799 \pm 0.063$                 | $0.656 \pm 0.074$     | $0.656 \pm 0.051$     | $0.837 \pm 0.061$     | $0.399 \pm 0.061$ | $0.374 \pm 0.073$       |
| <b>6</b>  | $0.618 \pm 0.047$                   | $0.802 \pm 0.096$                 | $0.579 \pm 0.077$     | $0.777 \pm 0.053$     | $0.938 \pm 0.076$     | $0.838 \pm 0.066$ | $0.760 \pm 0.062$       |



**Table S2.** Free binding energy estimation and molecular interactions of compounds

| 1-6        |                                  |                                                                                                                                                                                           |
|------------|----------------------------------|-------------------------------------------------------------------------------------------------------------------------------------------------------------------------------------------|
| ligand     | free bindingenergy<br>(kcal/mol) | molecular interaction                                                                                                                                                                     |
| compound 1 | -4.0                             | Trp <sup>1</sup> : H-donor with PHE106(B)<br>Phe <sup>4</sup> : H-acceptor with SER84(B)                                                                                                  |
| compound 2 | -4.2                             | Trp <sup>1</sup> : H-donor with SER180(A) and ARG48(B); pi-H<br>with GLN50(B)<br>Val <sup>3</sup> : H-donor with ASP49(A)<br>Phe <sup>4</sup> -OCH <sub>3</sub> :H-acceptor with ARG48(B) |
| compound 3 | -3.9                             | Trp <sup>1</sup> : H-donor with ALA108(B)<br>Val <sup>2</sup> : H-acceptor with LYS85(B)                                                                                                  |
| compound 4 | -2.8                             | Val <sup>3</sup> : H-acceptor with ASN109(B)<br>Phe <sup>4</sup> : pi-H with ASP96(A)                                                                                                     |
| compound 5 | -3.1                             | Val <sup>3</sup> :H-pi with PHE144(A)<br>Phe <sup>4</sup> -OCH <sub>3</sub> : pi-H with ARG214(A)                                                                                         |
| compound 6 | -3.4                             | Val <sup>3</sup> : H-pi with PHE144(A)                                                                                                                                                    |
